# Supplementary material for: TP53 engagement with the genome occurs in distinct local chromatin environments via pioneer factor activity
Source: PubMed Central journal article supplement — Genome Res. 2015 Feb;25(2):179–88. doi: 10.1101/gr.181883.114 (PMC4315292; doi:10.1101/gr.181883.114), 2015-02

**A**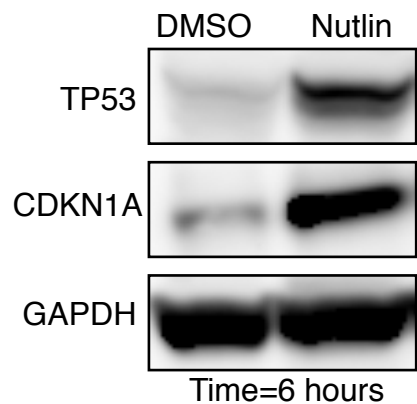**B**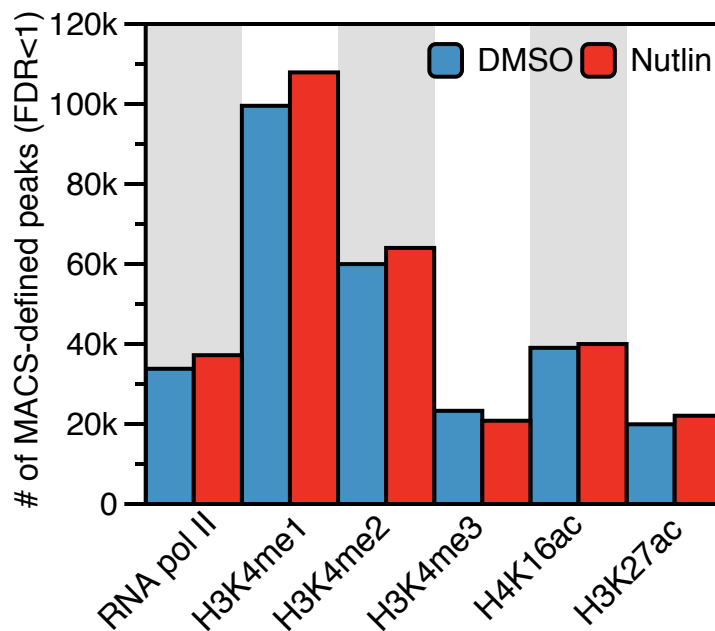**C**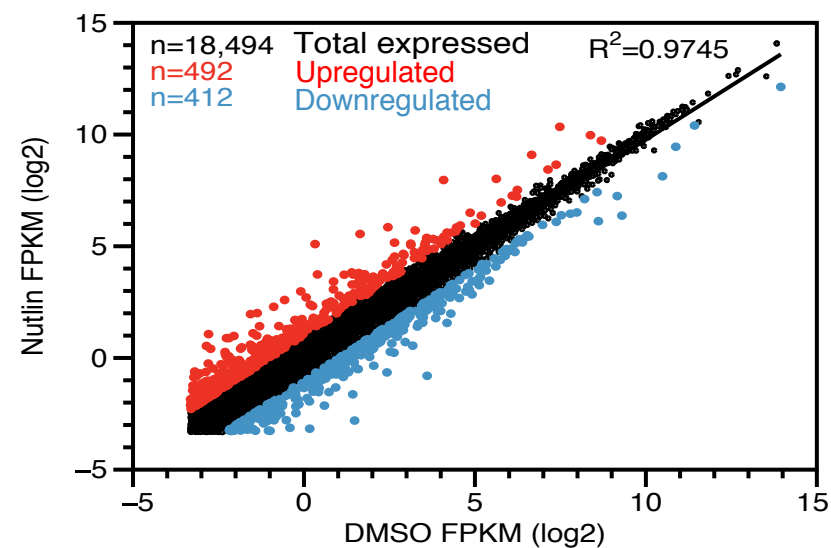**D**

|               | Gene Ontology Term (Top 5)          | p-value  |
|---------------|-------------------------------------|----------|
| Upregulated   | Cellular response to stress         | 4.90E-05 |
|               | Regulation of programmed cell death | 2.00E-04 |
|               | Programmed cell death               | 2.00E-04 |
|               | Response to DNA damage stimulus     | 2.00E-04 |
|               | Apoptotic process                   | 2.00E-04 |
| Downregulated | Cell cycle phase                    | 5.22E-78 |
|               | Cell cycle process                  | 1.16E-75 |
|               | Cell cycle                          | 2.23E-75 |
|               | mitotic cell cycle                  | 5.19E-65 |
|               | M phase                             | 5.29E-54 |

**E**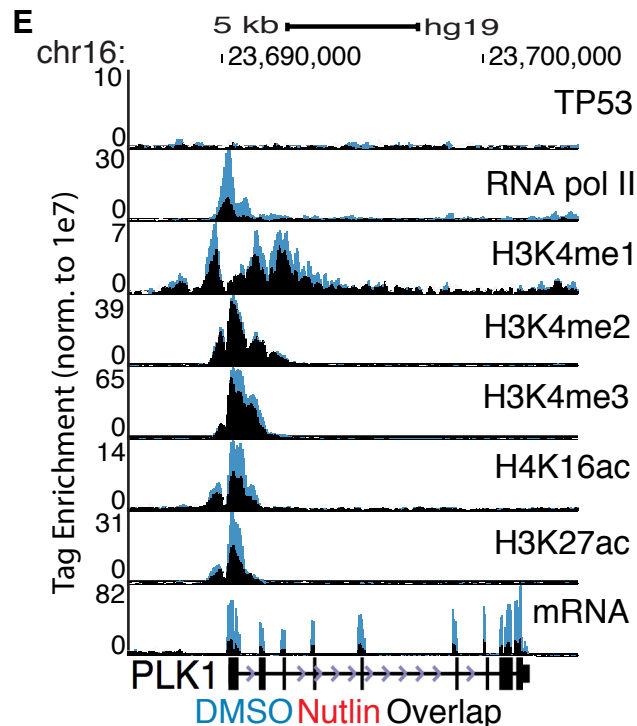

Supplement: supp_gr.181883.114_FigureS1.pdf [file supp_gr.181883.114_FigureS1.pdf]
