# Supplementary material for: TP53 engagement with the genome occurs in distinct local chromatin environments via pioneer factor activity
Source: HighWire-hosted journal article supplement (doi:10.1101/gr.181883.114), 2014-11-12
Supplement: Table_S1.docx [file Table_S1.docx]

| Table S1: Sequencing and Alignment Statistics | | | |  |  |
| --- | --- | --- | --- | --- | --- |
|  |  |  |  |  |  |
| **Sample** | **Uniquely Mapped Reads** | **Raw Reads** | **% Uniquely Aligned** | **Read Type** | **Read Length** |
|
| RNA pol II DMSO | 58,608,415 | 60,271,673 | 97.24 | SE | 50 |
|
| RNA pol II Nutlin | 49,270,394 | 50,794,628 | 97.00 | SE | 50 |
|
| H4me3 DMSO | 128,224,975 | 129,367,844 | 99.12 | SE | 50 |
|
| H4me3 Nutlin | 20,539,854 | 20,731,770 | 99.07 | SE | 50 |
|
| H3 DMSO | 58,956,237 | 59,803,030 | 98.58 | SE | 50 |
|
| H3 Nutlin | 62,285,472 | 63,157,308 | 98.62 | SE | 50 |
|
| H4K16ac DMSO | 84,438,599 | 85,433,539 | 98.84 | SE | 50 |
|
| H4K16ac Nutlin | 89,384,247 | 90,544,853 | 98.72 | SE | 50 |
|
| H3K27ac DMSO | 51,693,109 | 53,108,116 | 97.34 | SE | 100 |
|
| H3K27ac Nutlin | 52,952,727 | 54,520,169 | 97.13 | SE | 100 |
|
| H3K4me1 DMSO | 71,851,995 | 74,603,351 | 96.31 | SE | 50 |
|
| H3K4me1 Nutlin | 74,233,396 | 78,444,080 | 94.63 | SE | 50 |
|
| H3K4me2 DMSO | 75,793,952 | 79,261,418 | 95.63 | SE | 75 |
|
| H3K4me2 Nutlin | 63,349,636 | 69,502,416 | 91.15 | SE | 75 |
|
| ATAC DMSO | 140,970,281 | 155,961,869 | 90.39 | SE | 75/100 |
|
| ATAC Nutlin | 142,524,378 | 155,868,384 | 91.44 | SE | 75/100 |
|
| Input DMSO | 149,887,552 | 152,741,833 | 98.13 | SE | 50 |
|
| Input Nutlin | 151,285,418 | 154,084,432 | 98.18 | SE | 50 |
|
| TP53 DMSO | 117,913,821 | 121,883,390 | 96.74 | SE | 50 |
|
| TP53 Nutlin | 87,920,766 | 91,507,866 | 96.08 | SE | 50 |
|
| RNA DMSO | 92,332,315 | 112,337,036 | 82.19 | PE | 50 |
|
| RNA Nutlin | 203,902,138 | 250,762,950 | 81.31 | PE | 50 |
|
