# Supplementary material for: TP53 engagement with the genome occurs in distinct local chromatin environments via pioneer factor activity
Source: HighWire-hosted journal article supplement (doi:10.1101/gr.181883.114), 2014-11-12
Supplement: Table_S2.docx [file Table_S2.docx]

Table S2: Number of MACS-defined peaks

|  |  |  |
| --- | --- | --- |
|  | DMSO | Nutlin |
| RNA pol II | 33806 | 37197 |
| H3K4me1 | 99550 | 107900 |
| H3K4me2 | 59976 | 64017 |
| H3K4me3 | 23295 | 20811 |
| H3K27ac | 39040 | 39989 |
| H4K16ac | 19926 | 22065 |
| ATAC | 55804 | 57930 |
| TP53 | 23 | 4415 |
