# Supplementary material for: TP53 engagement with the genome occurs in distinct local chromatin environments via pioneer factor activity
Source: HighWire-hosted journal article supplement (doi:10.1101/gr.181883.114), 2014-11-12
Supplement: Table_S3.docx [file Table_S3.docx]

Table S3: TP53 binding site meta-analysis for hg18 mapped data

| **Manuscript** | **Cell Line** | **Treatment** | **# of called peaks** | **% with p53 motif** | **GEO/ArrayExpress** |
| --- | --- | --- | --- | --- | --- |
|
| Akmedir et al | hES | Doxorubicin | 3920 | 88.21 | GSM981236 |
|
| Akmedir et al | hES | Retinoic Acid | 4395 | 38.89 | GSM981237 |
|
| McDade et al | NHEK | Adriamycin | 5111 | 95.91 | GSM1366690 |
|
| McDade et al | NHEK | Cisplatin | 9577 | 91.17 | GSM1366691 |
|
| McDade et al | NHEK | Adriamycin | 10424 | 83.83 | GSM1366696 |
|
| McDade et al | NHEK | Cisplatin | 16157 | 82.05 | GSM1366697 |
|
| Menendez et al | U2OS | Doxorubicin | 2800 | 81.04 | GSM1133484 |
|
| Menendez et al | U2OS | Nutlin | 14273 | 59.1 | GSM1133486 |
|
| Nikulenkov et al | MCF7 | 5-FU | 1431 | 71.84 | N/A |
|
| Nikulenkov et al | MCF7 | Nutlin | 7521 | 42.19 | N/A |
|
| Nikulenkov et al | MCF7 | RITA | 2055 | 78.64 | N/A |
|
| Schlereth et al | Saos2 | p53 OE | 6212 | 84.85 | E-MTAB-1394 |
|
| Schlereth et al | Saos2 | p53 OE | 7892 | 71.24 | E-MTAB-1394 |
|
| Zeron-Medina at al | Lympoblastoid | Doxorubicin | 26635 | 34.99 | GSM1142696 |
|
|
