# Supplementary material for: TP53 engagement with the genome occurs in distinct local chromatin environments via pioneer factor activity
Source: HighWire-hosted journal article supplement (doi:10.1101/gr.181883.114), 2014-11-12
Supplement: Table_S4.docx [file Table_S4.docx]

Table S4: Analysis of overlapping TP53 peaks in TP53 meta-analysis for hg18 mapped data

|  | **# of overlapping peaks** | | |
| --- | --- | --- | --- |
| **Manuscript** | **H3K4me3+** | **H3K4me1+** | **H3K4me1-** |
| Akmedir et al | 277 | 493 | 801 |
| Akmedir et al | 212 | 274 | 600 |
| McDade et al | 218 | 672 | 1016 |
| McDade et al | 391 | 915 | 1158 |
| McDade et al | 382 | 859 | 1139 |
| McDade et al | 436 | 1014 | 1193 |
| Menendez et al | 155 | 506 | 754 |
| Menendez et al | 501 | 1026 | 1182 |
| Nikulenkov et al | 151 | 264 | 381 |
| Nikulenkov et al | 320 | 512 | 779 |
| Nikulenkov et al | 201 | 356 | 542 |
| Schlereth et al | 198 | 617 | 897 |
| Schlereth et al | 370 | 658 | 854 |
| Zeron-Medina at al | 591 | 712 | 997 |
| # of peaks considered | 835 | 1227 | 1237 |
