# Supplementary material for: TP53 engagement with the genome occurs in distinct local chromatin environments via pioneer factor activity
Source: HighWire-hosted journal article supplement (doi:10.1101/gr.181883.114), 2014-11-12
Supplement: Table_S5.docx [file Table_S5.docx]

Table S5: Order of clustering for Figure 5C

| 1 (Left) | wgEncodeAwgDnaseUwCaco2UniPk.narrowPeak.bed |
| --- | --- |
| 2 | wgEncodeAwgDnaseDukeHuh7UniPk.narrowPeak.bed |
| 3 | wgEncodeAwgDnaseDukeHuh75UniPk.narrowPeak.bed |
| 4 | wgEncodeAwgDnaseDukeLncapandrogenUniPk.narrowPeak.bed |
| 5 | wgEncodeAwgDnaseDukePanisletsUniPk.narrowPeak.bed |
| 6 | wgEncodeAwgDnaseUwSknshraUniPk.narrowPeak.bed |
| 7 | wgEncodeAwgDnaseUwTh2UniPk.narrowPeak.bed |
| 8 | wgEncodeAwgDnaseDukeCllUniPk.narrowPeak.bed |
| 9 | wgEncodeAwgDnaseUwCd20UniPk.narrowPeak.bed |
| 10 | wgEncodeAwgDnaseDukeHepatocytesUniPk.narrowPeak.bed |
| 11 | wgEncodeAwgDnaseDukeGm12891UniPk.narrowPeak.bed |
| 12 | wgEncodeAwgDnaseDukeGm19239UniPk.narrowPeak.bed |
| 13 | wgEncodeAwgDnaseDukeGm18507UniPk.narrowPeak.bed |
| 14 | wgEncodeAwgDnaseDukeGm19238UniPk.narrowPeak.bed |
| 15 | wgEncodeAwgDnaseDukeGm12892UniPk.narrowPeak.bed |
| 16 | wgEncodeAwgDnaseUwGm06990UniPk.narrowPeak.bed |
| 17 | wgEncodeAwgDnaseUwPanc1UniPk.narrowPeak.bed |
| 18 | wgEncodeAwgDnaseDukeHsmmembUniPk.narrowPeak.bed |
| 19 | wgEncodeAwgDnaseDukeGlioblaUniPk.narrowPeak.bed |
| 20 | wgEncodeAwgDnaseDukeStellateUniPk.narrowPeak.bed |
| 21 | wgEncodeAwgDnaseDukeHelas3ifna4hUniPk.narrowPeak.bed |
| 22 | wgEncodeAwgDnaseDukeMcf7hypoxiaUniPk.narrowPeak.bed |
| 23 | wgEncodeAwgDnaseDukeT47dUniPk.narrowPeak.bed |
| 24 | wgEncodeAwgDnaseDukeIshikawaestradiolUniPk.narrowPeak.bed |
| 25 | wgEncodeAwgDnaseDukeIshikawatamoxifenUniPk.narrowPeak.bed |
| 26 | wgEncodeAwgDnaseDukeTh0UniPk.narrowPeak.bed |
| 27 | wgEncodeAwgDnaseUwMonocytescd14ro01746UniPk.narrowPeak.bed |
| 28 | wgEncodeAwgDnaseUwNb4UniPk.narrowPeak.bed |
| 29 | wgEncodeAwgDnaseUwHl60UniPk.narrowPeak.bed |
| 30 | wgEncodeAwgDnaseDukeH9esUniPk.narrowPeak.bed |
| 31 | wgEncodeAwgDnaseDukeIpsUniPk.narrowPeak.bed |
| 32 | wgEncodeAwgDnaseDuke8988tUniPk.narrowPeak.bed |
| 33 | wgEncodeAwgDnaseUwdukeHelas3UniPk.narrowPeak.bed |
| 34 | wgEncodeAwgDnaseUwSknmcUniPk.narrowPeak.bed |
| 35 | wgEncodeAwgDnaseDukeUrotheliaUniPk.narrowPeak.bed |
| 36 | wgEncodeAwgDnaseDukeUrotheliaut189UniPk.narrowPeak.bed |
| 37 | wgEncodeAwgDnaseUwBe2cUniPk.narrowPeak.bed |
| 38 | wgEncodeAwgDnaseUwCmkUniPk.narrowPeak.bed |
| 39 | wgEncodeAwgDnaseUwCd34mobilizedUniPk.narrowPeak.bed |
| 40 | wgEncodeAwgDnaseUwJurkatUniPk.narrowPeak.bed |
| 41 | wgEncodeAwgDnaseUwdukeHepg2UniPk.narrowPeak.bed |
| 42 | wgEncodeAwgDnaseDukeChorionUniPk.narrowPeak.bed |
| 43 | wgEncodeAwgDnaseDukeMyometrUniPk.narrowPeak.bed |
| 44 | wgEncodeAwgDnaseDukeProgfibUniPk.narrowPeak.bed |
| 45 | wgEncodeAwgDnaseDukePanisletdUniPk.narrowPeak.bed |
| 46 | wgEncodeAwgDnaseUwHct116UniPk.narrowPeak.bed |
| 47 | wgEncodeAwgDnaseUwdukeMcf7UniPk.narrowPeak.bed |
| 48 | wgEncodeAwgDnaseUwHmvecdlyadUniPk.narrowPeak.bed |
| 49 | wgEncodeAwgDnaseUwHmvecdadUniPk.narrowPeak.bed |
| 50 | wgEncodeAwgDnaseUwHmvecllyUniPk.narrowPeak.bed |
| 51 | wgEncodeAwgDnaseUwHmvecdneoUniPk.narrowPeak.bed |
| 52 | wgEncodeAwgDnaseUwHpaecUniPk.narrowPeak.bed |
| 53 | wgEncodeAwgDnaseUwdukeHuvecUniPk.narrowPeak.bed |
| 54 | wgEncodeAwgDnaseUwHmvecdlyneoUniPk.narrowPeak.bed |
| 55 | wgEncodeAwgDnaseUwHmvecdblneoUniPk.narrowPeak.bed |
| 56 | wgEncodeAwgDnaseUwHrgecUniPk.narrowPeak.bed |
| 57 | wgEncodeAwgDnaseUwHmveclblUniPk.narrowPeak.bed |
| 58 | wgEncodeAwgDnaseUwHmvecdbladUniPk.narrowPeak.bed |
| 59 | wgEncodeAwgDnaseDukeMedulloUniPk.narrowPeak.bed |
| 60 | wgEncodeAwgDnaseDukeHtr8svnUniPk.narrowPeak.bed |
| 61 | wgEncodeAwgDnaseUwdukeA549UniPk.narrowPeak.bed |
| 62 | wgEncodeAwgDnaseDukeGm19240UniPk.narrowPeak.bed |
| 63 | wgEncodeAwgDnaseUwdukeGm12878UniPk.narrowPeak.bed |
| 64 | wgEncodeAwgDnaseUwGm12864UniPk.narrowPeak.bed |
| 65 | wgEncodeAwgDnaseUwGm12865UniPk.narrowPeak.bed |
| 66 | wgEncodeAwgDnaseUwdukeK562UniPk.narrowPeak.bed |
| 67 | wgEncodeAwgDnaseUwdukeTh1UniPk.narrowPeak.bed |
| 68 | wgEncodeAwgDnaseDukeMelanoUniPk.narrowPeak.bed |
| 69 | wgEncodeAwgDnaseDukeOsteoblUniPk.narrowPeak.bed |
| 70 | wgEncodeAwgDnaseDukeFibroblUniPk.narrowPeak.bed |
| 71 | wgEncodeAwgDnaseUwNt2d1UniPk.narrowPeak.bed |
| 72 | wgEncodeAwgDnaseUwH7hescUniPk.narrowPeak.bed |
| 73 | wgEncodeAwgDnaseUwdukeH1hescUniPk.narrowPeak.bed |
| 74 | wgEncodeAwgDnaseUwRptecUniPk.narrowPeak.bed |
| 75 | wgEncodeAwgDnaseUwHrcepicUniPk.narrowPeak.bed |
| 76 | wgEncodeAwgDnaseUwHreUniPk.narrowPeak.bed |
| 77 | wgEncodeAwgDnaseUwHgfUniPk.narrowPeak.bed |
| 78 | wgEncodeAwgDnaseUwAg09319UniPk.narrowPeak.bed |
| 79 | wgEncodeAwgDnaseUwHconfUniPk.narrowPeak.bed |
| 80 | wgEncodeAwgDnaseUwHpfUniPk.narrowPeak.bed |
| 81 | wgEncodeAwgDnaseUwAg04450UniPk.narrowPeak.bed |
| 82 | wgEncodeAwgDnaseUwHacUniPk.narrowPeak.bed |
| 83 | wgEncodeAwgDnaseUwHbmecUniPk.narrowPeak.bed |
| 84 | wgEncodeAwgDnaseUwHcfUniPk.narrowPeak.bed |
| 85 | wgEncodeAwgDnaseUwHcmUniPk.narrowPeak.bed |
| 86 | wgEncodeAwgDnaseUwHpafUniPk.narrowPeak.bed |
| 87 | wgEncodeAwgDnaseUwAoafUniPk.narrowPeak.bed |
| 88 | wgEncodeAwgDnaseDukeAosmcUniPk.narrowPeak.bed |
| 89 | wgEncodeAwgDnaseUwHvmfUniPk.narrowPeak.bed |
| 90 | wgEncodeAwgDnaseUwHaepicUniPk.narrowPeak.bed |
| 91 | wgEncodeAwgDnaseUwAg04449UniPk.narrowPeak.bed |
| 92 | wgEncodeAwgDnaseUwAg10803UniPk.narrowPeak.bed |
| 93 | wgEncodeAwgDnaseUwAg09309UniPk.narrowPeak.bed |
| 94 | wgEncodeAwgDnaseUwBjUniPk.narrowPeak.bed |
| 95 | wgEncodeAwgDnaseUwHffUniPk.narrowPeak.bed |
| 96 | wgEncodeAwgDnaseUwHpdlfUniPk.narrowPeak.bed |
| 97 | wgEncodeAwgDnaseUwNhdfneoUniPk.narrowPeak.bed |
| 98 | wgEncodeAwgDnaseUwHcfaaUniPk.narrowPeak.bed |
| 99 | wgEncodeAwgDnaseUwHmfUniPk.narrowPeak.bed |
| 100 | wgEncodeAwgDnaseUwNhaUniPk.narrowPeak.bed |
| 101 | wgEncodeAwgDnaseUwNhlfUniPk.narrowPeak.bed |
| 102 | wgEncodeAwgDnaseUwHnpcepicUniPk.narrowPeak.bed |
| 103 | wgEncodeAwgDnaseUwHcpepicUniPk.narrowPeak.bed |
| 104 | wgEncodeAwgDnaseUwHipepicUniPk.narrowPeak.bed |
| 105 | wgEncodeAwgDnaseUwHaspUniPk.narrowPeak.bed |
| 106 | wgEncodeAwgDnaseUwHrpepicUniPk.narrowPeak.bed |
| 107 | wgEncodeAwgDnaseUwHahUniPk.narrowPeak.bed |
| 108 | wgEncodeAwgDnaseUwSkmcUniPk.narrowPeak.bed |
| 109 | wgEncodeAwgDnaseUwWi38UniPk.narrowPeak.bed |
| 110 | wgEncodeAwgDnaseUwWi38tamoxifentamoxifenUniPk.narrowPeak.bed |
| 111 | wgEncodeAwgDnaseUwdukeHsmmUniPk.narrowPeak.bed |
| 112 | wgEncodeAwgDnaseUwdukeHsmmtubeUniPk.narrowPeak.bed |
| 113 | wgEncodeAwgDnaseDukeFibropUniPk.narrowPeak.bed |
| 114 | wgEncodeAwgDnaseUwdukeLncapUniPk.narrowPeak.bed |
| 115 | wgEncodeAwgDnaseUwWerirb1UniPk.narrowPeak.bed |
| 116 | wgEncodeAwgDnaseUwNhdfadUniPk.narrowPeak.bed |
| 117 | wgEncodeAwgDnaseUwHffmycUniPk.narrowPeak.bed |
| 118 | wgEncodeAwgDnaseDukeHpde6e6e7UniPk.narrowPeak.bed |
| 119 | wgEncodeAwgDnaseDukeRwpe1UniPk.narrowPeak.bed |
| 120 | wgEncodeAwgDnaseDukePhteUniPk.narrowPeak.bed |
| 121 | wgEncodeAwgDnaseUwdukeHmecUniPk.narrowPeak.bed |
| 122 | wgEncodeAwgDnaseUwPrecUniPk.narrowPeak.bed |
| 123 | wgEncodeAwgDnaseUwdukeNhekUniPk.narrowPeak.bed |
| 124 | wgEncodeAwgDnaseUwHeepicUniPk.narrowPeak.bed |
| 125 (Right) | wgEncodeAwgDnaseUwSaecUniPk.narrowPeak.bed |
