# Supplementary material for: TP53 engagement with the genome occurs in distinct local chromatin environments via pioneer factor activity
Source: HighWire-hosted journal article supplement (doi:10.1101/gr.181883.114), 2014-11-12
Supplement: Table_S6.docx [file Table_S6.docx]

Table S6: Order of intersection for Figure S5B – TP53 distal peak intersection with DHSs in various cell types

| **DHS Peak File** | **# of intersecting TP53 distal peaks** | **# of DHSs** | **Normalized %** |
| --- | --- | --- | --- |
| wgEncodeAwgDnaseUwSaecUniPk.narrowPeak.bed | 990 | 198500 | 0.004987406 |
| wgEncodeAwgDnaseUwHeepicUniPk.narrowPeak.bed | 954 | 209911 | 0.004544783 |
| wgEncodeAwgDnaseUwPrecUniPk.narrowPeak.bed | 718 | 167728 | 0.00428074 |
| wgEncodeAwgDnaseUwdukeNhekUniPk.narrowPeak.bed | 808 | 214369 | 0.003769202 |
| wgEncodeAwgDnaseDukeRwpe1UniPk.narrowPeak.bed | 520 | 154398 | 0.003367919 |
| wgEncodeAwgDnaseUwHffmycUniPk.narrowPeak.bed | 696 | 209928 | 0.003315422 |
| wgEncodeAwgDnaseDukeHpde6e6e7UniPk.narrowPeak.bed | 447 | 141214 | 0.003165409 |
| wgEncodeAwgDnaseDukePhteUniPk.narrowPeak.bed | 678 | 272612 | 0.002487051 |
| wgEncodeAwgDnaseUwdukeHmecUniPk.narrowPeak.bed | 792 | 339865 | 0.002330337 |
| wgEncodeAwgDnaseUwNhdfadUniPk.narrowPeak.bed | 394 | 230752 | 0.001707461 |
| wgEncodeAwgDnaseUwHnpcepicUniPk.narrowPeak.bed | 345 | 212499 | 0.001623537 |
| wgEncodeAwgDnaseUwSkmcUniPk.narrowPeak.bed | 320 | 205571 | 0.00155664 |
| wgEncodeAwgDnaseUwHipepicUniPk.narrowPeak.bed | 324 | 225828 | 0.00143472 |
| wgEncodeAwgDnaseUwGm12865UniPk.narrowPeak.bed | 202 | 143882 | 0.001403928 |
| wgEncodeAwgDnaseUwWi38UniPk.narrowPeak.bed | 233 | 166501 | 0.001399391 |
| wgEncodeAwgDnaseUwGm12864UniPk.narrowPeak.bed | 186 | 137884 | 0.00134896 |
| wgEncodeAwgDnaseUwHaspUniPk.narrowPeak.bed | 263 | 195373 | 0.001346143 |
| wgEncodeAwgDnaseDukeHtr8svnUniPk.narrowPeak.bed | 173 | 129699 | 0.001333858 |
| wgEncodeAwgDnaseUwNhaUniPk.narrowPeak.bed | 251 | 191583 | 0.001310137 |
| wgEncodeAwgDnaseUwHahUniPk.narrowPeak.bed | 260 | 200181 | 0.001298825 |
| wgEncodeAwgDnaseUwHpdlfUniPk.narrowPeak.bed | 222 | 171459 | 0.00129477 |
| wgEncodeAwgDnaseUwHffUniPk.narrowPeak.bed | 249 | 192389 | 0.001294253 |
| wgEncodeAwgDnaseUwHmfUniPk.narrowPeak.bed | 229 | 179541 | 0.001275475 |
| wgEncodeAwgDnaseUwWi38tamoxifenUniPk.narrowPeak.bed | 262 | 205421 | 0.001275429 |
| wgEncodeAwgDnaseUwNhlfUniPk.narrowPeak.bed | 262 | 206309 | 0.00126994 |
| wgEncodeAwgDnaseUwHrgecUniPk.narrowPeak.bed | 174 | 137958 | 0.001261253 |
| wgEncodeAwgDnaseUwNhdfneoUniPk.narrowPeak.bed | 236 | 188057 | 0.001254939 |
| wgEncodeAwgDnaseUwHct116UniPk.narrowPeak.bed | 143 | 114252 | 0.001251619 |
| wgEncodeAwgDnaseUwWerirb1UniPk.narrowPeak.bed | 239 | 191456 | 0.001248329 |
| wgEncodeAwgDnaseUwHmvecdbladUniPk.narrowPeak.bed | 203 | 162702 | 0.00124768 |
| wgEncodeAwgDnaseUwHpfUniPk.narrowPeak.bed | 191 | 154523 | 0.001236062 |
| wgEncodeAwgDnaseUwAg04450UniPk.narrowPeak.bed | 181 | 148226 | 0.001221108 |
| wgEncodeAwgDnaseUwHcpepicUniPk.narrowPeak.bed | 257 | 210465 | 0.001221106 |
| wgEncodeAwgDnaseUwAg04449UniPk.narrowPeak.bed | 200 | 166257 | 0.001202957 |
| wgEncodeAwgDnaseUwBjUniPk.narrowPeak.bed | 195 | 162164 | 0.001202486 |
| wgEncodeAwgDnaseDukeAosmcUniPk.narrowPeak.bed | 200 | 167357 | 0.00119505 |
| wgEncodeAwgDnaseUwAg10803UniPk.narrowPeak.bed | 202 | 171275 | 0.00117939 |
| wgEncodeAwgDnaseUwHcfaaUniPk.narrowPeak.bed | 217 | 184588 | 0.001175591 |
| wgEncodeAwgDnaseUwAoafUniPk.narrowPeak.bed | 197 | 174032 | 0.001131976 |
| wgEncodeAwgDnaseUwRptecUniPk.narrowPeak.bed | 187 | 169414 | 0.001103805 |
| wgEncodeAwgDnaseUwHmveclblUniPk.narrowPeak.bed | 184 | 170076 | 0.001081869 |
| wgEncodeAwgDnaseUwHreUniPk.narrowPeak.bed | 199 | 187214 | 0.001062955 |
| wgEncodeAwgDnaseUwHpafUniPk.narrowPeak.bed | 200 | 188187 | 0.001062773 |
| wgEncodeAwgDnaseUwdukeA549UniPk.narrowPeak.bed | 187 | 176870 | 0.001057274 |
| wgEncodeAwgDnaseUwHvmfUniPk.narrowPeak.bed | 179 | 170492 | 0.001049903 |
| wgEncodeAwgDnaseUwAg09309UniPk.narrowPeak.bed | 211 | 201397 | 0.001047682 |
| wgEncodeAwgDnaseUwHmvecdlyneoUniPk.narrowPeak.bed | 159 | 153233 | 0.001037635 |
| wgEncodeAwgDnaseUwGm06990UniPk.narrowPeak.bed | 96 | 93463 | 0.001027144 |
| wgEncodeAwgDnaseUwAg09319UniPk.narrowPeak.bed | 142 | 141324 | 0.001004783 |
| wgEncodeAwgDnaseUwHconfUniPk.narrowPeak.bed | 154 | 153794 | 0.001001339 |
| wgEncodeAwgDnaseUwHmvecdblneoUniPk.narrowPeak.bed | 168 | 168548 | 0.000996749 |
| wgEncodeAwgDnaseUwHrpepicUniPk.narrowPeak.bed | 223 | 227189 | 0.000981562 |
| wgEncodeAwgDnaseUwHgfUniPk.narrowPeak.bed | 143 | 145986 | 0.000979546 |
| wgEncodeAwgDnaseUwHrcepicUniPk.narrowPeak.bed | 188 | 192212 | 0.000978087 |
| wgEncodeAwgDnaseUwHbmecUniPk.narrowPeak.bed | 191 | 199919 | 0.000955387 |
| wgEncodeAwgDnaseUwHpaecUniPk.narrowPeak.bed | 118 | 124069 | 0.000951084 |
| wgEncodeAwgDnaseUwHaepicUniPk.narrowPeak.bed | 195 | 205124 | 0.000950644 |
| wgEncodeAwgDnaseUwdukeH1hescUniPk.narrowPeak.bed | 244 | 258188 | 0.000945048 |
| wgEncodeAwgDnaseUwdukeGm12878UniPk.narrowPeak.bed | 171 | 183953 | 0.000929585 |
| wgEncodeAwgDnaseUwHcmUniPk.narrowPeak.bed | 179 | 193489 | 0.000925117 |
| wgEncodeAwgDnaseUwHcfUniPk.narrowPeak.bed | 161 | 174781 | 0.000921153 |
| wgEncodeAwgDnaseUwdukeHsmmtubeUniPk.narrowPeak.bed | 284 | 318528 | 0.000891601 |
| wgEncodeAwgDnaseDukeFibropUniPk.narrowPeak.bed | 230 | 258648 | 0.000889239 |
| wgEncodeAwgDnaseUwCmkUniPk.narrowPeak.bed | 118 | 133232 | 0.000885673 |
| wgEncodeAwgDnaseUwNt2d1UniPk.narrowPeak.bed | 160 | 184397 | 0.000867693 |
| wgEncodeAwgDnaseUwdukeHsmmUniPk.narrowPeak.bed | 259 | 305056 | 0.000849024 |
| wgEncodeAwgDnaseDukeGm18507UniPk.narrowPeak.bed | 99 | 117693 | 0.000841172 |
| wgEncodeAwgDnaseDukeUrotheliaUniPk.narrowPeak.bed | 123 | 146333 | 0.000840549 |
| wgEncodeAwgDnaseUwJurkatUniPk.narrowPeak.bed | 132 | 159753 | 0.000826276 |
| wgEncodeAwgDnaseUwHmvecdneoUniPk.narrowPeak.bed | 115 | 141204 | 0.000814425 |
| wgEncodeAwgDnaseUwdukeK562UniPk.narrowPeak.bed | 164 | 202266 | 0.000810813 |
| wgEncodeAwgDnaseUwdukeHuvecUniPk.narrowPeak.bed | 157 | 194101 | 0.000808857 |
| wgEncodeAwgDnaseUwPanc1UniPk.narrowPeak.bed | 93 | 117019 | 0.000794743 |
| wgEncodeAwgDnaseDukeUrotheliaut189UniPk.narrowPeak.bed | 141 | 180383 | 0.00078167 |
| wgEncodeAwgDnaseUwH7hescUniPk.narrowPeak.bed | 205 | 266731 | 0.000768565 |
| wgEncodeAwgDnaseUwSknmcUniPk.narrowPeak.bed | 111 | 146661 | 0.000756847 |
| wgEncodeAwgDnaseUwHacUniPk.narrowPeak.bed | 134 | 180216 | 0.000743552 |
| wgEncodeAwgDnaseUwdukeMcf7UniPk.narrowPeak.bed | 148 | 199549 | 0.000741672 |
| wgEncodeAwgDnaseUwHmvecdadUniPk.narrowPeak.bed | 93 | 125454 | 0.000741308 |
| wgEncodeAwgDnaseUwHl60UniPk.narrowPeak.bed | 119 | 161856 | 0.000735221 |
| wgEncodeAwgDnaseUwHmvecllyUniPk.narrowPeak.bed | 106 | 145038 | 0.000730843 |
| wgEncodeAwgDnaseUwCd34mobilizedUniPk.narrowPeak.bed | 120 | 164217 | 0.00073074 |
| wgEncodeAwgDnaseDukeGm19240UniPk.narrowPeak.bed | 133 | 184267 | 0.000721779 |
| wgEncodeAwgDnaseUwdukeLncapUniPk.narrowPeak.bed | 222 | 308446 | 0.000719737 |
| wgEncodeAwgDnaseUwdukeHepg2UniPk.narrowPeak.bed | 135 | 192959 | 0.00069963 |
| wgEncodeAwgDnaseDukePanisletdUniPk.narrowPeak.bed | 143 | 207301 | 0.000689818 |
| wgEncodeAwgDnaseDukeMyometrUniPk.narrowPeak.bed | 120 | 174042 | 0.000689489 |
| wgEncodeAwgDnaseUwNb4UniPk.narrowPeak.bed | 99 | 143952 | 0.000687729 |
| wgEncodeAwgDnaseDukeChorionUniPk.narrowPeak.bed | 124 | 180605 | 0.000686581 |
| wgEncodeAwgDnaseUwBe2cUniPk.narrowPeak.bed | 120 | 176124 | 0.000681338 |
| wgEncodeAwgDnaseDukeIshikawaestradiolUniPk.narrowPeak.bed | 94 | 140650 | 0.000668326 |
| wgEncodeAwgDnaseDukeIshikawatamoxifenUniPk.narrowPeak.bed | 95 | 143760 | 0.000660824 |
| wgEncodeAwgDnaseDukeMelanoUniPk.narrowPeak.bed | 189 | 286491 | 0.000659707 |
| wgEncodeAwgDnaseDukeProgfibUniPk.narrowPeak.bed | 138 | 211409 | 0.000652763 |
| wgEncodeAwgDnaseUwHmvecdlyadUniPk.narrowPeak.bed | 83 | 127871 | 0.000649092 |
| wgEncodeAwgDnaseDukeLncapandrogenUniPk.narrowPeak.bed | 96 | 148213 | 0.000647716 |
| wgEncodeAwgDnaseUwTh2UniPk.narrowPeak.bed | 59 | 91930 | 0.000641793 |
| wgEncodeAwgDnaseDukeGm12891UniPk.narrowPeak.bed | 91 | 144558 | 0.000629505 |
| wgEncodeAwgDnaseUwCd20UniPk.narrowPeak.bed | 69 | 110633 | 0.000623684 |
| wgEncodeAwgDnaseDukeGm19239UniPk.narrowPeak.bed | 81 | 130097 | 0.000622612 |
| wgEncodeAwgDnaseDukeHsmmembUniPk.narrowPeak.bed | 80 | 131323 | 0.000609185 |
| wgEncodeAwgDnaseUwMonocytescd14ro01746UniPk.narrowPeak.bed | 83 | 136573 | 0.000607734 |
| wgEncodeAwgDnaseUwdukeHelas3UniPk.narrowPeak.bed | 121 | 199188 | 0.000607466 |
| wgEncodeAwgDnaseDukeHuh7UniPk.narrowPeak.bed | 92 | 153887 | 0.000597841 |
| wgEncodeAwgDnaseDukeT47dUniPk.narrowPeak.bed | 90 | 150896 | 0.000596437 |
| wgEncodeAwgDnaseDukeMcf7hypoxiaUniPk.narrowPeak.bed | 91 | 153344 | 0.000593437 |
| wgEncodeAwgDnaseDukeHelas3ifna4hUniPk.narrowPeak.bed | 68 | 117383 | 0.0005793 |
| wgEncodeAwgDnaseDukeGm19238UniPk.narrowPeak.bed | 88 | 152180 | 0.000578263 |
| wgEncodeAwgDnaseUwdukeTh1UniPk.narrowPeak.bed | 179 | 310034 | 0.000577356 |
| wgEncodeAwgDnaseDukeH9esUniPk.narrowPeak.bed | 93 | 163824 | 0.000567682 |
| wgEncodeAwgDnaseDukeGlioblaUniPk.narrowPeak.bed | 93 | 167960 | 0.000553703 |
| wgEncodeAwgDnaseDukeStellateUniPk.narrowPeak.bed | 92 | 166575 | 0.000552304 |
| wgEncodeAwgDnaseDukeTh0UniPk.narrowPeak.bed | 113 | 204817 | 0.000551712 |
| wgEncodeAwgDnaseDukeMedulloUniPk.narrowPeak.bed | 126 | 228510 | 0.000551398 |
| wgEncodeAwgDnaseDukeGm12892UniPk.narrowPeak.bed | 85 | 158618 | 0.000535879 |
| wgEncodeAwgDnaseDukeHuh75UniPk.narrowPeak.bed | 98 | 182986 | 0.00053556 |
| wgEncodeAwgDnaseDuke8988tUniPk.narrowPeak.bed | 105 | 196180 | 0.000535223 |
| wgEncodeAwgDnaseDukeIpsUniPk.narrowPeak.bed | 109 | 203810 | 0.000534812 |
| wgEncodeAwgDnaseUwSknshraUniPk.narrowPeak.bed | 48 | 90398 | 0.000530985 |
| wgEncodeAwgDnaseDukeFibroblUniPk.narrowPeak.bed | 214 | 407256 | 0.000525468 |
| wgEncodeAwgDnaseDukePanisletsUniPk.narrowPeak.bed | 92 | 181241 | 0.000507611 |
| wgEncodeAwgDnaseDukeCllUniPk.narrowPeak.bed | 47 | 97955 | 0.000479812 |
| wgEncodeAwgDnaseDukeOsteoblUniPk.narrowPeak.bed | 175 | 379854 | 0.000460703 |
| wgEncodeAwgDnaseUwCaco2UniPk.narrowPeak.bed | 55 | 123048 | 0.00044698 |
| wgEncodeAwgDnaseDukeHepatocytesUniPk.narrowPeak.bed | 57 | 179285 | 0.00031793 |
