# Supplementary material for: TP53 engagement with the genome occurs in distinct local chromatin environments via pioneer factor activity
Source: HighWire-hosted journal article supplement (doi:10.1101/gr.181883.114), 2014-11-12
Supplement: Table_S7.docx [file Table_S7.docx]

**Table S7: Complete Motif Analysis for p53 TSS sites**

| **Motif Name** | **Consensus** | **P-value** | **Log P-value** | **q-value (Benjamini)** | **# of Target Sequences with Motif(of 916)** | **% of Target Sequences with Motif** | **# of Background Sequences with Motif(of 47364)** | **% of Background Sequences with Motif** |
| --- | --- | --- | --- | --- | --- | --- | --- | --- |
| p53(p53)/Saos-p53-ChIP-Seq(GSE15780)/Homer | RRCATGYCYRGRCATGYYYN | 1.00E-110 | -2.55E+02 | 0 | 98 | 10.70% | 156.3 | 0.33% |
| p53(p53)/Saos-p53-ChIP-Seq/Homer | RRCATGYCYRGRCATGYYYN | 1.00E-110 | -2.55E+02 | 0 | 98 | 10.70% | 156.3 | 0.33% |
| p63(p53)/Keratinocyte-p63-ChIP- Seq(GSE17611)/Homer | NNDRCATGYCYNRRCATGYH | 1.00E-70 | -1.62E+02 | 0 | 110 | 12.01% | 578.3 | 1.21% |
| p53(p53)/mES-cMyc-ChIP-Seq(GSE11431)/Homer | ACATGCCCGGGCAT | 1.00E-45 | -1.04E+02 | 0 | 37 | 4.04% | 48.7 | 0.10% |
| Jun-AP1(bZIP)/K562-cJun-ChIP- Seq(GSE31477)/Homer | GATGASTCATCN | 1.00E-24 | -5.71E+01 | 0 | 42 | 4.59% | 252.7 | 0.53% |
| Atf3(bZIP)/GBM-ATF3-ChIP- Seq(GSE33912)/Homer | DATGASTCATHN | 1.00E-21 | -5.05E+01 | 0 | 62 | 6.77% | 698.1 | 1.46% |
| AP-1(bZIP)/ThioMac-PU.1-ChIP- Seq(GSE21512)/Homer | VTGACTCATC | 1.00E-21 | -5.03E+01 | 0 | 68 | 7.42% | 840.9 | 1.76% |
| BATF(bZIP)/Th17-BATF-ChIP- Seq(GSE39756)/Homer | DATGASTCAT | 1.00E-21 | -5.03E+01 | 0 | 62 | 6.77% | 701.2 | 1.47% |
| Bach2(bZIP)/OCILy7-Bach2-ChIP- Seq(GSE44420)/Homer | TGCTGAGTCA | 1.00E-20 | -4.78E+01 | 0 | 35 | 3.82% | 210.1 | 0.44% |
| MafK(bZIP)/C2C12-MafK-ChIP- Seq(GSE36030)/Homer | GCTGASTCAGCA | 1.00E-09 | -2.12E+01 | 0 | 27 | 2.95% | 327.6 | 0.69% |
| Bach1(bZIP)/K562-Bach1-ChIP- Seq(GSE31477)/Homer | AWWNTGCTGAGTCAT | 1.00E-06 | -1.42E+01 | 0 | 8 | 0.87% | 36.7 | 0.08% |
| NF-E2(bZIP)/K562-NFE2-ChIP- Seq(GSE31477)/Homer | GATGACTCAGCA | 1.00E-04 | -1.14E+01 | 0.0002 | 8 | 0.87% | 53.8 | 0.11% |
| Nrf2(bZIP)/Lymphoblast-Nrf2-ChIP- Seq(GSE37589)/Homer | HTGCTGAGTCAT | 1.00E-04 | -1.14E+01 | 0.0002 | 7 | 0.76% | 38.7 | 0.08% |
| FOXP1(Forkhead)/H9-FOXP1-ChIP- Seq(GSE31006)/Homer | NYYTGTTTACHN | 1.00E-04 | -9.35E+00 | 0.0015 | 23 | 2.51% | 481.8 | 1.01% |
| MafA(bZIP)/Islet-MafA-ChIP- Seq(GSE30298)/Homer | TGCTGACTCA | 1.00E-04 | -9.21E+00 | 0.0016 | 46 | 5.02% | 1314.9 | 2.75% |
| Foxa2(Forkhead)/Liver-Foxa2-ChIP- Seq(GSE25694)/Homer | CYTGTTTACWYW | 1.00E-03 | -8.67E+00 | 0.0027 | 35 | 3.82% | 928.6 | 1.94% |
| TEAD4(TEA)/Tropoblast-Tead4-ChIP- Seq(GSE37350)/Homer | CCWGGAATGY | 1.00E-03 | -8.32E+00 | 0.0035 | 51 | 5.57% | 1567.3 | 3.28% |
| CArG(MADS)/PUER-Srf-ChIP-Seq(Sullivan et al.)/Homer | CCATATATGGNM | 1.00E-03 | -8.08E+00 | 0.0042 | 19 | 2.07% | 394.7 | 0.83% |
| RUNX1(Runt)/Jurkat-RUNX1-ChIP- Seq(GSE29180)/Homer | AAACCACARM | 1.00E-03 | -7.88E+00 | 0.0049 | 51 | 5.57% | 1598.5 | 3.35% |
| Tcfcp2l1(CP2)/mES-Tcfcp2l1-ChIP- Seq(GSE11431)/Homer | NRAACCRGTTYRAACCRGYT | 1.00E-03 | -7.79E+00 | 0.0051 | 14 | 1.53% | 248.2 | 0.52% |
| Fox:Ebox(Forkhead:HLH)/Panc1-Foxa2-ChIP- Seq(GSE47459)/Homer | NNNVCTGWGYAAACASN | 1.00E-03 | -7.20E+00 | 0.0088 | 40 | 4.37% | 1204.1 | 2.52% |
| Smad2(MAD)/ES-SMAD2-ChIP- Seq(GSE29422)/Homer | CTGTCTGG | 1.00E-02 | -6.78E+00 | 0.0127 | 103 | 11.24% | 3958.1 | 8.29% |
| FOXA1(Forkhead)/LNCAP-FOXA1-ChIP- Seq(GSE27824)/Homer | WAAGTAAACA | 1.00E-02 | -6.45E+00 | 0.0169 | 45 | 4.91% | 1459.3 | 3.06% |
| FOXA1(Forkhead)/MCF7-FOXA1-ChIP- Seq(GSE26831)/Homer | WAAGTAAACA | 1.00E-02 | -6.34E+00 | 0.0182 | 38 | 4.15% | 1182.7 | 2.48% |
| STAT5(Stat)/mCD4+-Stat5-ChIP- Seq(GSE12346)/Homer | RTTTCTNAGAAA | 1.00E-02 | -5.36E+00 | 0.0463 | 19 | 2.07% | 502.1 | 1.05% |
| RUNX(Runt)/HPC7-Runx1-ChIP- Seq(GSE22178)/Homer | SAAACCACAG | 1.00E-02 | -5.35E+00 | 0.0463 | 33 | 3.60% | 1050.8 | 2.20% |
| HIF-1a(HLH)/MCF7-HIF1a-ChIP- Seq(GSE28352)/Homer | TACGTGCV | 1.00E-02 | -5.23E+00 | 0.0488 | 26 | 2.84% | 777.1 | 1.63% |
| IRF2(IRF)/Erythroblas-IRF2-ChIP- Seq(GSE36985)/Homer | GAAASYGAAASY | 1.00E-02 | -4.96E+00 | 0.0619 | 9 | 0.98% | 173.9 | 0.36% |
| BORIS(Zf)/K562-CTCFL-ChIP- Seq(GSE32465)/Homer | CNNBRGCGCCCCCTGSTGGC | 1.00E-01 | -4.46E+00 | 0.0978 | 25 | 2.73% | 788.7 | 1.65% |
| AR-halfsite(NR)/LNCaP-AR-ChIP- Seq(GSE27824)/Homer | CCAGGAACAG | 1.00E-01 | -4.40E+00 | 0.1011 | 199 | 21.72% | 8944 | 18.73% |
| Bcl6(Zf)/Liver-Bcl6-ChIP-Seq(GSE31578)/Homer | NNNCTTTCCAGGAAA | 1.00E-01 | -4.31E+00 | 0.1064 | 59 | 6.44% | 2276.2 | 4.77% |
| BMYB(HTH)/Hela-BMYB- ChIPSeq(GSE27030)/Homer | NHAACBGYYV | 1.00E-01 | -4.16E+00 | 0.1201 | 70 | 7.64% | 2798.1 | 5.86% |
| Atoh1(bHLH)/Cerebellum-Atoh1-ChIP- Seq(GSE22111)/Homer | VNRVCAGCTGGY | 1.00E-01 | -4.01E+00 | 0.1348 | 63 | 6.88% | 2497.2 | 5.23% |
| E2F6(E2F)/Hela-E2F6-ChIP- Seq(GSE31477)/Homer | GGCGGGAARN | 1.00E-01 | -3.79E+00 | 0.1629 | 73 | 7.97% | 2991.9 | 6.27% |
| CHR/Cell-Cycle-Exp/Homer | SRGTTTCAAA | 1.00E-01 | -3.75E+00 | 0.1652 | 24 | 2.62% | 800.4 | 1.68% |
| RUNX2(Runt)/PCa-RUNX2-ChIP- Seq(GSE33889)/Homer | NWAACCACADNN | 1.00E-01 | -3.69E+00 | 0.1714 | 32 | 3.49% | 1147.5 | 2.40% |
| Chop(bZIP)/MEF-Chop-ChIP- Seq(GSE35681)/Homer | ATTGCATCAT | 1.00E-01 | -3.68E+00 | 0.1714 | 10 | 1.09% | 252 | 0.53% |
| Atf4(bZIP)/MEF-Atf4-ChIP-Seq(GSE35681)/Homer | MTGATGCAAT | 1.00E-01 | -3.61E+00 | 0.1752 | 12 | 1.31% | 328.6 | 0.69% |
| Elk4(ETS)/Hela-Elk4-ChIP-Seq(GSE31477)/Homer | NRYTTCCGGY | 1.00E-01 | -3.58E+00 | 0.1763 | 55 | 6.00% | 2190.3 | 4.59% |
| GATA-DR4(Zf)/iTreg-Gata3-ChIP- Seq(GSE20898)/Homer | AGATGKDGAGATAAG | 1.00E-01 | -3.43E+00 | 0.1997 | 5 | 0.55% | 91.7 | 0.19% |
| STAT4(Stat)/CD4-Stat4-ChIP- Seq(GSE22104)/Homer | NYTTCCWGGAAR | 1.00E-01 | -3.40E+00 | 0.1997 | 39 | 4.26% | 1486.1 | 3.11% |
| TEAD(TEA)/Fibroblast-PU.1-ChIP- Seq(Unpublished)/Homer | YCWGGAATGY | 1.00E-01 | -3.38E+00 | 0.1997 | 29 | 3.17% | 1046.4 | 2.19% |
| E2F7(E2F)/Hela-E2F7-ChIP- Seq(GSE32673)/Homer | VDTTTCCCGCCA | 1.00E-01 | -3.33E+00 | 0.2042 | 19 | 2.07% | 624.6 | 1.31% |
| NF1-halfsite(CTF)/LNCaP-NF1-ChIP- Seq(Unpublished)/Homer | YTGCCAAG | 1.00E-01 | -3.31E+00 | 0.2042 | 91 | 9.93% | 3925.1 | 8.22% |
| Egr1(Zf)/K562-Egr1-ChIP-Seq(GSE32465)/Homer | TGCGTGGGYG | 1.00E-01 | -3.29E+00 | 0.2042 | 71 | 7.75% | 2978.7 | 6.24% |
| STAT6/Macrophage-Stat6-ChIP- Seq(GSE38377)/Homer | TTCCKNAGAA | 1.00E-01 | -3.02E+00 | 0.2617 | 22 | 2.40% | 777.7 | 1.63% |
| ZFX(Zf)/mES-Zfx-ChIP-Seq(GSE11431)/Homer | AGGCCTRG | 1.00E-01 | -2.96E+00 | 0.2713 | 99 | 10.81% | 4382.3 | 9.18% |
| Nur77(NR)/K562-NR4A1-ChIP- Seq(GSE31363)/Homer | TGACCTTTNCNT | 1.00E-01 | -2.95E+00 | 0.2713 | 8 | 0.87% | 210.8 | 0.44% |
| c-Myc(HLH)/LNCAP-cMyc-ChIP- Seq(unpublished)/Homer | VCCACGTG | 1.00E-01 | -2.88E+00 | 0.2815 | 39 | 4.26% | 1551.8 | 3.25% |
| Tcf3(HMG)/mES-Tcf3-ChIP-Seq(GSE11724)/Homer | ASWTCAAAGG | 1.00E-01 | -2.68E+00 | 0.3378 | 10 | 1.09% | 301.1 | 0.63% |
| Tbox:Smad/ESCd5-Smad2_3-ChIP- Seq(GSE29422)/Homer | AGGTGHCAGACA | 1.00E-01 | -2.63E+00 | 0.3483 | 10 | 1.09% | 304.5 | 0.64% |
| Isl1(Homeobox)/Neuron-Isl1-ChIP- Seq(GSE31456)/Homer | CTAATKGV | 1.00E-01 | -2.61E+00 | 0.3483 | 60 | 6.55% | 2576.8 | 5.40% |
| GATA-IR4(Zf)/iTreg-Gata3-ChIP- Seq(GSE20898)/Homer | NAGATWNBNATCTNN | 1.00E-01 | -2.49E+00 | 0.3867 | 3 | 0.33% | 53.9 | 0.11% |
| NF1(CTF)/LNCAP-NF1-ChIP- Seq(Unpublished)/Homer | CYTGGCABNSTGCCAR | 1.00E+00 | -2.29E+00 | 0.4628 | 25 | 2.73% | 987.1 | 2.07% |
| Lhx2(Homeobox)/HFSC-Lhx2-ChIP- Seq(GSE48068)/Homer | TAATTAGN | 1.00E+00 | -2.24E+00 | 0.4775 | 27 | 2.95% | 1085.2 | 2.27% |
| Rbpj1(?)/Panc1-Rbpj1-ChIP- Seq(GSE47459)/Homer | HTTTCCCASG | 1.00E+00 | -2.23E+00 | 0.4775 | 68 | 7.42% | 3037.1 | 6.36% |
| Gata2(Zf)/K562-GATA2-ChIP- Seq(GSE18829)/Homer | BBCTTATCTS | 1.00E+00 | -2.23E+00 | 0.4775 | 19 | 2.07% | 722.4 | 1.51% |
| E2F1(E2F)/Hela-E2F1-ChIP- Seq(GSE22478)/Homer | CWGGCGGGAA | 1.00E+00 | -2.15E+00 | 0.4931 | 35 | 3.82% | 1470.3 | 3.08% |
| Myf5(bHLH)/GM-Myf5-ChIP- Seq(GSE24852)/Homer | BAACAGCTGT | 1.00E+00 | -2.14E+00 | 0.4931 | 37 | 4.04% | 1566.3 | 3.28% |
| OCT4-SOX2-TCF- NANOG((POU/Homeobox/HMG)/mES-Oct4-ChIP- Seq(GSE11431)/Homer | ATTTGCATAACAATG | 1.00E+00 | -2.14E+00 | 0.4931 | 5 | 0.55% | 134.1 | 0.28% |
| Smad4(MAD)/ESC-SMAD4-ChIP- Seq(GSE29422)/Homer | VBSYGTCTGG | 1.00E+00 | -2.11E+00 | 0.4931 | 88 | 9.61% | 4046.3 | 8.47% |
| Ap4(HLH)/AML-Tfap4-ChIP- Seq(GSE45738)/Homer | NAHCAGCTGD | 1.00E+00 | -2.06E+00 | 0.5065 | 63 | 6.88% | 2832.7 | 5.93% |
| IRF1(IRF)/PBMC-IRF1-ChIP- Seq(GSE43036)/Homer | GAAAGTGAAAGT | 1.00E+00 | -2.06E+00 | 0.5065 | 7 | 0.76% | 217.7 | 0.46% |
| MyoD(HLH)/Myotube-MyoD-ChIP- Seq(GSE21614)/Homer | RRCAGCTGYTSY | 1.00E+00 | -2.02E+00 | 0.5099 | 48 | 5.24% | 2113.6 | 4.43% |
| E2F4(E2F)/K562-E2F4-ChIP- Seq(GSE31477)/Homer | GGCGGGAAAH | 1.00E+00 | -1.91E+00 | 0.5629 | 55 | 6.00% | 2476.6 | 5.19% |
| CTCF(Zf)/CD4+-CTCF-ChIP-Seq(Barski et al.)/Homer | AYAGTGCCMYCTRGTGGCCA | 1.00E+00 | -1.87E+00 | 0.5754 | 8 | 0.87% | 271.1 | 0.57% |
| ERE(NR/IR3)/MCF7-ERa-ChIP- Seq(Unpublished)/Homer | VAGGTCACNSTGACC | 1.00E+00 | -1.77E+00 | 0.6246 | 11 | 1.20% | 410.3 | 0.86% |
| ERG(ETS)/VCaP-ERG-ChIP- Seq(GSE14097)/Homer | ACAGGAAGTG | 1.00E+00 | -1.75E+00 | 0.6259 | 85 | 9.28% | 3994.3 | 8.37% |
| STAT1(Stat)/HelaS3-STAT1-ChIP- Seq(GSE12782)/Homer | NATTTCCNGGAAAT | 1.00E+00 | -1.70E+00 | 0.6533 | 11 | 1.20% | 417.5 | 0.87% |
| LXRE(NR/DR4)/BLRP(RAW)-LXRb-ChIP- Seq(GSE21512)/Homer | RGGTTACTANAGGTCA | 1.00E+00 | -1.70E+00 | 0.6533 | 8 | 0.87% | 284.2 | 0.60% |
| Oct2(POU/Homeobox)/Bcell-Oct2-ChIP- Seq(GSE21512)/Homer | ATATGCAAAT | 1.00E+00 | -1.65E+00 | 0.6669 | 9 | 0.98% | 332.1 | 0.70% |
| SCL(HLH)/HPC7-Scl-ChIP-Seq(GSE13511)/Homer | AVCAGCTG | 1.00E+00 | -1.64E+00 | 0.6669 | 241 | 26.31% | 11946.1 | 25.02% |
| GRE/RAW264.7-GRE-ChIP- Seq(Unpublished)/Homer | VAGRACAKWCTGTYC | 1.00E+00 | -1.64E+00 | 0.6669 | 9 | 0.98% | 334 | 0.70% |
| Rfx2(HTH)/LoVo-RFX2-ChIP- Seq(GSE49402)/Homer | GTTGCCATGGCAACM | 1.00E+00 | -1.64E+00 | 0.6669 | 7 | 0.76% | 245.7 | 0.51% |
| NFkB-p50,p52(RHD)/p50-ChIP-Chip(Schreiber et al.)/Homer | GGGGGAATCCCC | 1.00E+00 | -1.63E+00 | 0.6669 | 11 | 1.20% | 424.5 | 0.89% |
| HRE(HSF)/HepG2-HSF1-ChIP- Seq(GSE31477)/Homer | BSTTCTRGAABVTTCYAGAA | 1.00E+00 | -1.61E+00 | 0.6669 | 7 | 0.76% | 247.7 | 0.52% |
| RFX(HTH)/K562-RFX3-ChIP- Seq(SRA012198)/Homer | CGGTTGCCATGGCAAC | 1.00E+00 | -1.56E+00 | 0.6738 | 7 | 0.76% | 251.4 | 0.53% |
| ZNF711(Zf)/SH-SY5Y-ZNF711-ChIP- Seq(GSE20673)/Homer | AGGCCTAG | 1.00E+00 | -1.54E+00 | 0.6783 | 158 | 17.25% | 7753.7 | 16.24% |
| Hoxb4(Homeobox)/ES-Hoxb4-ChIP- Seq(GSE34014)/Homer | TGATTRATGGCY | 1.00E+00 | -1.53E+00 | 0.6783 | 5 | 0.55% | 166.9 | 0.35% |
| bHLHE40(HLH)/HepG2-BHLHE40-ChIP- Seq(GSE31477)/Homer | KCACGTGMCN | 1.00E+00 | -1.53E+00 | 0.6783 | 19 | 2.07% | 809.8 | 1.70% |
| HRE(HSF)/Striatum-HSF1-ChIP- Seq(GSE38000)/Homer | TTCTAGAABNTTCTA | 1.00E+00 | -1.49E+00 | 0.6819 | 7 | 0.76% | 256.4 | 0.54% |
| Foxo1(Forkhead)/RAW-Foxo1-ChIP-Seq(Fan et al.)/Homer | CTGTTTAC | 1.00E+00 | -1.49E+00 | 0.6819 | 74 | 8.08% | 3525.3 | 7.38% |
| Smad3(MAD)/NPC-Smad3-ChIP- Seq(GSE36673)/Homer | TWGTCTGV | 1.00E+00 | -1.44E+00 | 0.7039 | 126 | 13.76% | 6167 | 12.92% |
| TATA-Box(TBP)/Promoter/Homer | CCTTTTAWAGSC | 1.00E+00 | -1.43E+00 | 0.7039 | 37 | 4.04% | 1701 | 3.56% |
| PAX3:FKHR-fusion(Paired/Homeobox)/Rh4- PAX3:FKHR-ChIP-Seq(GSE19063)/Homer | ACCRTGACTAATTNN | 1.00E+00 | -1.42E+00 | 0.7039 | 5 | 0.55% | 173.5 | 0.36% |
| TCFL2(HMG)/K562-TCF7L2-ChIP- Seq(GSE29196)/Homer | ACWTCAAAGG | 1.00E+00 | -1.41E+00 | 0.7039 | 3 | 0.33% | 89.9 | 0.19% |
| NF1:FOXA1/LNCAP-FOXA1-ChIP- Seq(GSE27824)/Homer | WNTGTTTRYTTTGGCA | 1.00E+00 | -1.39E+00 | 0.7047 | 2 | 0.22% | 50.7 | 0.11% |
| HNF4a(NR/DR1)/HepG2-HNF4a-ChIP- Seq(GSE25021)/Homer | CARRGKBCAAAGTYCA | 1.00E+00 | -1.39E+00 | 0.7047 | 16 | 1.75% | 686.2 | 1.44% |
| PU.1(ETS)/ThioMac-PU.1-ChIP- Seq(GSE21512)/Homer | AGAGGAAGTG | 1.00E+00 | -1.38E+00 | 0.7047 | 22 | 2.40% | 976.2 | 2.04% |
| Elk1(ETS)/Hela-Elk1-ChIP-Seq(GSE31477)/Homer | HACTTCCGGY | 1.00E+00 | -1.37E+00 | 0.7047 | 48 | 5.24% | 2260.4 | 4.73% |
| TRa(NR)/C17.2-TRa-ChIP-Seq(GSE38347)/Homer | GGTCANYTGAGGWCA | 1.00E+00 | -1.36E+00 | 0.7047 | 26 | 2.84% | 1174.7 | 2.46% |
| Rfx1(HTH)/NPC-H3K4me1-ChIP- Seq(GSE16256)/Homer | KGTTGCCATGGCAA | 1.00E+00 | -1.36E+00 | 0.7047 | 10 | 1.09% | 407 | 0.85% |
| Gata1(Zf)/K562-GATA1-ChIP- Seq(GSE18829)/Homer | SAGATAAGRV | 1.00E+00 | -1.36E+00 | 0.7047 | 15 | 1.64% | 643.3 | 1.35% |
| CEBP(bZIP)/CEBPb-ChIP-Seq(GSE21512)/Homer | ATTGCGCAAC | 1.00E+00 | -1.34E+00 | 0.7047 | 25 | 2.73% | 1129.9 | 2.37% |
| GRE(NR/IR3)/A549-GR-ChIP- Seq(GSE32465)/Homer | NRGVACABNVTGTYCY | 1.00E+00 | -1.29E+00 | 0.7158 | 5 | 0.55% | 183.6 | 0.38% |
| Arnt:Ahr(bHLH)/MCF7-Arnt-ChIP-Seq(Lo et al.)/Homer | TBGCACGCAA | 1.00E+00 | -1.28E+00 | 0.7161 | 39 | 4.26% | 1835.3 | 3.84% |
| Hoxc9(Homeobox)/Ainv15-Hoxc9-ChIP- Seq(GSE21812)/Homer | GGCCATAAATCA | 1.00E+00 | -1.26E+00 | 0.7165 | 12 | 1.31% | 512.7 | 1.07% |
| Lhx3(Homeobox)/Neuron-Lhx3-ChIP- Seq(GSE31456)/Homer | ADBTAATTAR | 1.00E+00 | -1.26E+00 | 0.7165 | 39 | 4.26% | 1840 | 3.85% |
| Unknown-ESC-element/mES-Nanog-ChIP- Seq(GSE11724)/Homer | CACAGCAGGGGG | 1.00E+00 | -1.25E+00 | 0.7165 | 32 | 3.49% | 1494.7 | 3.13% |
| ARE(NR)/LNCAP-AR-ChIP- Seq(GSE27824)/Homer | RGRACASNSTGTYCYB | 1.00E+00 | -1.23E+00 | 0.7222 | 9 | 0.98% | 374.9 | 0.79% |
| Maz(Zf)/HepG2-Maz-ChIP-Seq(GSE31477)/Homer | GGGGGGGG | 1.00E+00 | -1.21E+00 | 0.7238 | 152 | 16.59% | 7594.3 | 15.91% |
| EWS:ERG-fusion(ETS)/CADO_ES1-EWS:ERG- ChIP-Seq(SRA014231)/Homer | ATTTCCTGTN | 1.00E+00 | -1.21E+00 | 0.7238 | 27 | 2.95% | 1254.5 | 2.63% |
| ISRE(IRF)/ThioMac-LPS-exp(GSE23622)/HOMER | AGTTTCASTTTC | 1.00E+00 | -1.18E+00 | 0.7319 | 3 | 0.33% | 101.2 | 0.21% |
| X-box(HTH)/NPC-H3K4me1-ChIP- Seq(GSE16256)/Homer | GGTTGCCATGGCAA | 1.00E+00 | -1.16E+00 | 0.7408 | 5 | 0.55% | 193.5 | 0.41% |
| GATA3(Zf)/iTreg-Gata3-ChIP- Seq(GSE20898)/Homer | AGATAASR | 1.00E+00 | -1.14E+00 | 0.7467 | 39 | 4.26% | 1869.7 | 3.92% |
| HIF2a(HLH)/785_O-HIF2a-ChIP- Seq(GSE34871)/Homer | GCACGTACCC | 1.00E+00 | -1.11E+00 | 0.7689 | 21 | 2.29% | 978.3 | 2.05% |
| Pbx3(Homeobox)/GM12878-PBX3-ChIP- Seq(GSE32465)/Homer | SCTGTCAMTCAN | 1.00E+00 | -1.10E+00 | 0.7689 | 8 | 0.87% | 341 | 0.71% |
| Fli1(ETS)/CD8-FLI-ChIP-Seq(GSE20898)/Homer | NRYTTCCGGH | 1.00E+00 | -1.08E+00 | 0.7719 | 70 | 7.64% | 3459.1 | 7.24% |
| ETV1(ETS)/GIST48-ETV1-ChIP- Seq(GSE22441)/Homer | AACCGGAAGT | 1.00E+00 | -1.03E+00 | 0.8044 | 76 | 8.30% | 3785.5 | 7.93% |
| REST-NRSF(Zf)/Jurkat-NRSF-ChIP-Seq/Homer | GGMGCTGTCCATGGTGCTGA | 1.00E+00 | -1.03E+00 | 0.8044 | 1 | 0.11% | 23.8 | 0.05% |
| CLOCK(HLH)/Liver-Clock-ChIP- Seq(GSE39860)/Homer | GHCACGTG | 1.00E+00 | -1.01E+00 | 0.8087 | 27 | 2.95% | 1300.3 | 2.72% |
| GLI3(Zf)/GLI3-ChIP-Chip(GSE11077)/Homer | CGTGGGTGGTCC | 1.00E+00 | -9.89E-01 | 0.8166 | 6 | 0.66% | 258 | 0.54% |
| RBPJ:Ebox/Panc1-Rbpj1-ChIP- Seq(GSE47459)/Homer | GGGRAARRGRMCAGMTG | 1.00E+00 | -9.87E-01 | 0.8166 | 14 | 1.53% | 652.7 | 1.37% |
| GABPA(ETS)/Jurkat-GABPa-ChIP- Seq(GSE17954)/Homer | RACCGGAAGT | 1.00E+00 | -9.64E-01 | 0.8234 | 52 | 5.68% | 2584.8 | 5.41% |
| Mouse_Recombination_Hotspot/Testis-DMC1-ChIP- Seq(GSE24438)/Homer | ACTYKNATTCGTGNTACTTC | 1.00E+00 | -9.63E-01 | 0.8234 | 2 | 0.22% | 69.4 | 0.15% |
| RUNX-AML(Runt)/CD4+-PolII-ChIP-Seq(Barski et al.)/Homer | GCTGTGGTTW | 1.00E+00 | -9.48E-01 | 0.8234 | 22 | 2.40% | 1062.7 | 2.23% |
| Gata4(Zf)/Heart-Gata4-ChIP- Seq(GSE35151)/Homer | NBWGATAAGR | 1.00E+00 | -9.40E-01 | 0.8234 | 24 | 2.62% | 1165.9 | 2.44% |
| NFAT(RHD)/Jurkat-NFATC1-ChIP-Seq(Jolma et al.)/Homer | ATTTTCCATT | 1.00E+00 | -9.33E-01 | 0.8234 | 27 | 2.95% | 1319.6 | 2.76% |
| Nkx2.5(Homeobox)/HL1-Nkx2.5.biotin-ChIP- Seq(GSE21529)/Homer | RRSCACTYAA | 1.00E+00 | -9.25E-01 | 0.8234 | 91 | 9.93% | 4602.2 | 9.64% |
| Six1(Homeobox)/Myoblast-Six1-ChIP- Chip(GSE20150)/Homer | GKVTCADRTTWC | 1.00E+00 | -8.86E-01 | 0.8452 | 6 | 0.66% | 269.9 | 0.57% |
| USF1(HLH)/GM12878-Usf1-ChIP- Seq(GSE32465)/Homer | SGTCACGTGR | 1.00E+00 | -8.81E-01 | 0.8452 | 22 | 2.40% | 1078.4 | 2.26% |
| MyoG(HLH)/C2C12-MyoG-ChIP- Seq(GSE36024)/Homer | AACAGCTG | 1.00E+00 | -8.75E-01 | 0.8452 | 53 | 5.79% | 2668.9 | 5.59% |
| Tlx?(NR)/NPC-H3K4me1-ChIP- Seq(GSE16256)/Homer | CTGGCAGSCTGCCA | 1.00E+00 | -8.44E-01 | 0.8603 | 18 | 1.97% | 883.5 | 1.85% |
| EBF1(EBF)/Near-E2A-ChIP- Seq(GSE21512)/Homer | GTCCCCWGGGGA | 1.00E+00 | -8.37E-01 | 0.8603 | 70 | 7.64% | 3560.8 | 7.46% |
| PAX5(Paired/Homeobox)/GM12878-PAX5-ChIP- Seq(GSE32465)/Homer | GCAGCCAAGCRTGACH | 1.00E+00 | -7.96E-01 | 0.8877 | 20 | 2.18% | 997 | 2.09% |
| Sox2(HMG)/mES-Sox2-ChIP- Seq(GSE11431)/Homer | BCCATTGTTC | 1.00E+00 | -7.67E-01 | 0.9065 | 30 | 3.28% | 1521.6 | 3.19% |
| E-box(HLH)/Promoter/Homer | SSGGTCACGTGA | 1.00E+00 | -7.56E-01 | 0.9098 | 5 | 0.55% | 235.7 | 0.49% |
| HOXD13(Homeobox)/Chicken-Hoxd13-ChIP- Seq(GSE38910)/Homer | NCYAATAAAA | 1.00E+00 | -7.53E-01 | 0.9098 | 24 | 2.62% | 1215.1 | 2.54% |
| Pdx1(Homeobox)/Islet-Pdx1-ChIP- Seq(SRA008281)/Homer | YCATYAATCA | 1.00E+00 | -7.49E-01 | 0.9098 | 21 | 2.29% | 1061.7 | 2.22% |
| ETS(ETS)/Promoter/Homer | AACCGGAAGT | 1.00E+00 | -7.44E-01 | 0.9098 | 23 | 2.51% | 1166.1 | 2.44% |
| Nkx6.1(Homeobox)/Islet-Nkx6.1-ChIP- Seq(GSE40975)/Homer | GKTAATGR | 1.00E+00 | -7.37E-01 | 0.9098 | 62 | 6.77% | 3192 | 6.69% |
| E2F(E2F)/Cell-Cycle-Exp/Homer | TTSGCGCGAAAA | 1.00E+00 | -7.03E-01 | 0.9226 | 5 | 0.55% | 242.8 | 0.51% |
| Olig2(bHLH)/Neuron-Olig2-ChIP- Seq(GSE30882)/Homer | RCCATMTGTT | 1.00E+00 | -6.99E-01 | 0.9226 | 72 | 7.86% | 3731.3 | 7.81% |
| Oct4(POU/Homeobox)/mES-Oct4-ChIP- Seq(GSE11431)/Homer | ATTTGCATAW | 1.00E+00 | -6.68E-01 | 0.9415 | 10 | 1.09% | 509.4 | 1.07% |
| ELF5(ETS)/T47D-ELF5-ChIP- Seq(GSE30407)/Homer | ACVAGGAAGT | 1.00E+00 | -6.54E-01 | 0.9478 | 30 | 3.28% | 1560.7 | 3.27% |
| Ets1-distal(ETS)/CD4+-PolII-ChIP-Seq(Barski et al.)/Homer | MACAGGAAGT | 1.00E+00 | -6.54E-01 | 0.9478 | 10 | 1.09% | 512.8 | 1.07% |
| HNF6(Homeobox)/Liver-Hnf6-ChIP- Seq(ERP000394)/Homer | NTATYGATCH | 1.00E+00 | -6.28E-01 | 0.9582 | 12 | 1.31% | 623.1 | 1.31% |
| CEBP:CEBP(bZIP)/MEF-Chop-ChIP- Seq(GSE35681)/Homer | NTNATGCAAYMNNHTGMAAY | 1.00E+00 | -6.19E-01 | 0.9595 | 4 | 0.44% | 201.7 | 0.42% |
| NFY(CCAAT)/Promoter/Homer | RGCCAATSRG | 1.00E+00 | -6.17E-01 | 0.9595 | 27 | 2.95% | 1416.8 | 2.97% |
| PRDM14(Zf)/H1-PRDM14-ChIP- Seq(GSE22767)/Homer | RGGTCTCTAACY | 1.00E+00 | -6.02E-01 | 0.9623 | 8 | 0.87% | 417.2 | 0.87% |
| Erra(NR)/HepG2-Erra-ChIP- Seq(GSE31477)/Homer | CAAAGGTCAG | 1.00E+00 | -6.01E-01 | 0.9623 | 103 | 11.24% | 5410.6 | 11.33% |
| Stat3(Stat)/mES-Stat3-ChIP- Seq(GSE11431)/Homer | CTTCCGGGAA | 1.00E+00 | -6.00E-01 | 0.9623 | 21 | 2.29% | 1106.3 | 2.32% |
| MYB(HTH)/ERMYB-Myb- ChIPSeq(GSE22095)/Homer | GGCVGTTR | 1.00E+00 | -5.94E-01 | 0.9623 | 72 | 7.86% | 3790.2 | 7.94% |
| Atf1(bZIP)/K562-ATF1-ChIP- Seq(GSE31477)/Homer | GATGACGTCA | 1.00E+00 | -5.80E-01 | 0.9623 | 25 | 2.73% | 1325 | 2.77% |
| AP-2gamma(AP2)/MCF7-TFAP2C-ChIP- Seq(GSE21234)/Homer | SCCTSAGGSCAW | 1.00E+00 | -5.79E-01 | 0.9623 | 90 | 9.83% | 4744.1 | 9.94% |
| Pax8(Paired/Homeobox)/Thyroid-Pax8-ChIP- Seq(GSE26938)/Homer | GTCATGCHTGRCTGS | 1.00E+00 | -5.72E-01 | 0.9623 | 16 | 1.75% | 850.2 | 1.78% |
| Stat3+il21(Stat)/CD4-Stat3-ChIP- Seq(GSE19198)/Homer | SVYTTCCNGGAARB | 1.00E+00 | -5.70E-01 | 0.9623 | 24 | 2.62% | 1275.9 | 2.67% |
| Phox2a(Homeobox)/Neuron-Phox2a-ChIP- Seq(GSE31456)/Homer | YTAATYNRATTA | 1.00E+00 | -5.65E-01 | 0.9623 | 7 | 0.76% | 371 | 0.78% |
| Znf263(Zf)/K562-Znf263-ChIP- Seq(GSE31477)/Homer | CVGTSCTCCC | 1.00E+00 | -5.38E-01 | 0.9639 | 119 | 12.99% | 6296.5 | 13.19% |
| NFkB-p65-Rel(RHD)/LPS-exp(GSE23622)/Homer | GGAAATTCCC | 1.00E+00 | -5.32E-01 | 0.9639 | 2 | 0.22% | 103.6 | 0.22% |
| Tcf4(HMG)/Hct116-Tcf4-ChIP- Seq(SRA012054)/Homer | ASATCAAAGGVA | 1.00E+00 | -5.21E-01 | 0.9677 | 11 | 1.20% | 597.9 | 1.25% |
| ELF1(ETS)/Jurkat-ELF1-ChIP- Seq(SRA014231)/Homer | AVCCGGAAGT | 1.00E+00 | -5.09E-01 | 0.9732 | 37 | 4.04% | 1991.7 | 4.17% |
| Foxh1(Forkhead)/hESC-FOXH1-ChIP- Seq(GSE29422)/Homer | NNTGTGGATTSS | 1.00E+00 | -5.03E-01 | 0.9732 | 15 | 1.64% | 818.8 | 1.71% |
| Tcf12(HLH)/GM12878-Tcf12-ChIP- Seq(GSE32465)/Homer | VCAGCTGYTG | 1.00E+00 | -5.03E-01 | 0.9732 | 50 | 5.46% | 2684.7 | 5.62% |
| Mef2c(MADS)/GM12878-Mef2c-ChIP- Seq(GSE32465)/Homer | DCYAAAAATAGM | 1.00E+00 | -4.91E-01 | 0.9732 | 16 | 1.75% | 876.3 | 1.84% |
| GRHL2(CP2)/HBE-GRHL2-ChIP- Seq(GSE46194)/Homer | AAACYKGTTWDACMRGTTTB | 1.00E+00 | -4.86E-01 | 0.9732 | 8 | 0.87% | 443.7 | 0.93% |
| VDR(NR/DR3)/GM10855-VDR+vitD-ChIP- Seq(GSE22484)/Homer | ARAGGTCANWGAGTTCANNN | 1.00E+00 | -4.81E-01 | 0.9732 | 6 | 0.66% | 334 | 0.70% |
| JunD(bZIP)/K562-JunD-ChIP-Seq/Homer | ATGACGTCATCN | 1.00E+00 | -4.70E-01 | 0.9736 | 3 | 0.33% | 168.6 | 0.35% |
| IRF4(IRF)/GM12878-IRF4-ChIP- Seq(GSE32465)/Homer | ACTGAAACCA | 1.00E+00 | -4.65E-01 | 0.9736 | 11 | 1.20% | 613.4 | 1.28% |
| EHF(ETS)/LoVo-EHF-ChIP- Seq(GSE49402)/Homer | AVCAGGAAGT | 1.00E+00 | -4.61E-01 | 0.9736 | 52 | 5.68% | 2815.5 | 5.90% |
| HOXA9(Homeobox)/HSC-Hoxa9-ChIP- Seq(GSE33509)/Homer | GGCCATAAATCA | 1.00E+00 | -4.38E-01 | 0.9862 | 13 | 1.42% | 731.2 | 1.53% |
| Max(HLH)/K562-Max-ChIP-Seq(GSE31477)/Homer | RCCACGTGGYYN | 1.00E+00 | -4.18E-01 | 0.9995 | 25 | 2.73% | 1392.2 | 2.92% |
| Srebp1a(HLH)/HepG2-Srebp1a-ChIP- Seq(GSE31477)/Homer | RTCACSCCAY | 1.00E+00 | -4.18E-01 | 0.9995 | 8 | 0.87% | 461.9 | 0.97% |
| ETS:RUNX/Jurkat-RUNX1-ChIP- Seq(GSE17954)/Homer | RCAGGATGTGGT | 1.00E+00 | -4.16E-01 | 0.9995 | 4 | 0.44% | 235.5 | 0.49% |
| Nkx2.1(Homeobox)/LungAC-Nkx2.1-ChIP- Seq(GSE43252)/Homer | RSCACTYRAG | 1.00E+00 | -3.89E-01 | 1 | 114 | 12.45% | 6165.4 | 12.91% |
| n-Myc(HLH)/mES-nMyc-ChIP- Seq(GSE11431)/Homer | VRCCACGTGG | 1.00E+00 | -3.86E-01 | 1 | 31 | 3.38% | 1734.6 | 3.63% |
| NFAT:AP1/Jurkat-NFATC1-ChIP-Seq(Jolma et al.)/Homer | SARTGGAAAAWRTGAGTCAB | 1.00E+00 | -3.78E-01 | 1 | 3 | 0.33% | 184.4 | 0.39% |
| Unknown(Homeobox)/Limb-p300-ChIP-Seq/Homer | SSCMATWAAA | 1.00E+00 | -3.62E-01 | 1 | 13 | 1.42% | 759.5 | 1.59% |
| Klf4(Zf)/mES-Klf4-ChIP-Seq(GSE11431)/Homer | GCCACACCCA | 1.00E+00 | -3.52E-01 | 1 | 25 | 2.73% | 1426.4 | 2.99% |
| CEBP:AP1(bZIP)/ThioMac-CEBPb-ChIP- Seq(GSE21512)/Homer | DRTGTTGCAA | 1.00E+00 | -3.45E-01 | 1 | 17 | 1.86% | 990 | 2.07% |
| AMYB(HTH)/Testes-AMYB-ChIP- Seq(GSE44588)/Homer | TGGCAGTTGG | 1.00E+00 | -3.40E-01 | 1 | 55 | 6.00% | 3063 | 6.41% |
| ETS1(ETS)/Jurkat-ETS1-ChIP- Seq(GSE17954)/Homer | ACAGGAAGTG | 1.00E+00 | -3.39E-01 | 1 | 48 | 5.24% | 2685.4 | 5.62% |
| BMAL1(HLH)/Liver-Bmal1-ChIP- Seq(GSE39860)/Homer | GNCACGTG | 1.00E+00 | -3.23E-01 | 1 | 65 | 7.10% | 3615.9 | 7.57% |
| FOXA1:AR/LNCAP-AR-ChIP- Seq(GSE27824)/Homer | AGTAAACAAAAAAGAACAND | 1.00E+00 | -3.09E-01 | 1 | 1 | 0.11% | 69 | 0.14% |
| Sox3(HMG)/NPC-Sox3-ChIP- Seq(GSE33059)/Homer | CCWTTGTY | 1.00E+00 | -2.91E-01 | 1 | 54 | 5.90% | 3050.1 | 6.39% |
| MafF(bZIP)/HepG2-MafF-ChIP- Seq(GSE31477)/Homer | HWWGTCAGCAWWTTT | 1.00E+00 | -2.90E-01 | 1 | 5 | 0.55% | 326.3 | 0.68% |
| ZBTB33(Zf)/GM12878-ZBTB33-ChIP- Seq(GSE32465)/Homer | GGVTCTCGCGAGAAC | 1.00E+00 | -2.88E-01 | 1 | 3 | 0.33% | 204.5 | 0.43% |
| Eomes(T-box)/H9-Eomes-ChIP- Seq(GSE26097)/Homer | ATTAACACCT | 1.00E+00 | -2.72E-01 | 1 | 60 | 6.55% | 3394.8 | 7.11% |
| ETS:E-box/HPC7-Scl-ChIP- Seq(GSE22178)/Homer | AGGAARCAGCTG | 1.00E+00 | -2.62E-01 | 1 | 2 | 0.22% | 146.4 | 0.31% |
| PRDM9(Zf)/Testis-DMC1-ChIP- Seq(GSE35498)/Homer | ADGGYAGYAGCATCT | 1.00E+00 | -2.60E-01 | 1 | 14 | 1.53% | 863.4 | 1.81% |
| PRDM1/BMI1(Zf)/Hela-PRDM1-ChIP- Seq(GSE31477)/Homer | ACTTTCACTTTC | 1.00E+00 | -2.58E-01 | 1 | 13 | 1.42% | 807.8 | 1.69% |
| Gfi1b(Zf)/HPC7-Gfi1b-ChIP- Seq(GSE22178)/Homer | MAATCACTGC | 1.00E+00 | -2.56E-01 | 1 | 23 | 2.51% | 1375.2 | 2.88% |
| STAT6(Stat)/CD4-Stat6-ChIP- Seq(GSE22104)/Homer | ABTTCYYRRGAA | 1.00E+00 | -2.53E-01 | 1 | 12 | 1.31% | 752.4 | 1.58% |
| GATA:SCL/Ter119-SCL-ChIP- Seq(GSE18720)/Homer | CRGCTGBNGNSNNSAGATAA | 1.00E+00 | -2.50E-01 | 1 | 2 | 0.22% | 149.6 | 0.31% |
| Oct4:Sox17/F9-Sox17-ChIP- Seq(GSE44553)/Homer | CCATTGTATGCAAAT | 1.00E+00 | -2.46E-01 | 1 | 2 | 0.22% | 150.8 | 0.32% |
| EWS:FLI1-fusion(ETS)/SK_N_MC-EWS:FLI1-ChIP- Seq(SRA014231)/Homer | VACAGGAAAT | 1.00E+00 | -2.45E-01 | 1 | 24 | 2.62% | 1439.7 | 3.02% |
| Ptf1a(HLH)/Panc1-Ptf1a-ChIP- Seq(GSE47459)/Homer | ACAGCTGTTN | 1.00E+00 | -2.34E-01 | 1 | 134 | 14.63% | 7425.9 | 15.55% |
| Pitx1(Homeobox)/Chicken-Pitx1-ChIP- Seq(GSE38910)/Homer | TAATCCCN | 1.00E+00 | -2.33E-01 | 1 | 155 | 16.92% | 8548.7 | 17.90% |
| PAX5-shortForm(Paired/Homeobox)/GM12878- PAX5-ChIP-Seq(GSE32465)/Homer | GTCACGCTCSCTGM | 1.00E+00 | -2.29E-01 | 1 | 3 | 0.33% | 221.8 | 0.46% |
| NPAS2(HLH)/Liver-NPAS2-ChIP- Seq(GSE39860)/Homer | KCCACGTGAC | 1.00E+00 | -2.25E-01 | 1 | 41 | 4.48% | 2402.6 | 5.03% |
| HOXA2(Homeobox)/mES-Hoxa2-ChIP- Seq(Donaldson et al.)/Homer | GYCATCMATCAT | 1.00E+00 | -2.18E-01 | 1 | 1 | 0.11% | 85.3 | 0.18% |
| Cdx2(Homeobox)/mES-Cdx2-ChIP- Seq(GSE14586)/Homer | GYMATAAAAH | 1.00E+00 | -2.16E-01 | 1 | 12 | 1.31% | 773.2 | 1.62% |
| PPARE(NR/DR1)/3T3L1-Pparg-ChIP- Seq(GSE13511)/Homer | TGACCTTTGCCCCA | 1.00E+00 | -2.10E-01 | 1 | 31 | 3.38% | 1860.3 | 3.90% |
| FXR(NR/IR1)/Liver-FXR-ChIP-Seq(Chong et al.)/Homer | AGGTCANTGACCTB | 1.00E+00 | -2.08E-01 | 1 | 14 | 1.53% | 895.4 | 1.88% |
| Mef2a(MADS)/HL1-Mef2a.biotin-ChIP- Seq(GSE21529/Homer | CYAAAAATAG | 1.00E+00 | -2.06E-01 | 1 | 13 | 1.42% | 838.5 | 1.76% |
| AP-2alpha(AP2)/Hela-AP2alpha-ChIP- Seq(GSE31477)/Homer | ATGCCCTGAGGC | 1.00E+00 | -2.03E-01 | 1 | 62 | 6.77% | 3581.5 | 7.50% |
| bZIP:IRF/Th17-BatF-ChIP-Seq(GSE39756)/Homer | NAGTTTCABTHTGACTNW | 1.00E+00 | -1.94E-01 | 1 | 7 | 0.76% | 487.2 | 1.02% |
| Sox6(HMG)/Myotubes-Sox6-ChIP- Seq(GSE32627)/Homer | CCATTGTTNY | 1.00E+00 | -1.92E-01 | 1 | 46 | 5.02% | 2714 | 5.68% |
| SPDEF(ETS)/VCaP-SPDEF-ChIP- Seq(SRA014231)/Homer | ASWTCCTGBT | 1.00E+00 | -1.85E-01 | 1 | 38 | 4.15% | 2277.2 | 4.77% |
| TR4(NR/DR1)/Hela-TR4-ChIP- Seq(GSE24685)/Homer | GAGGTCAAAGGTCA | 1.00E+00 | -1.81E-01 | 1 | 2 | 0.22% | 169.7 | 0.36% |
| NeuroD1(bHLH)/Islet-NeuroD1-ChIP- Seq(GSE30298)/Homer | GCCATCTGTT | 1.00E+00 | -1.65E-01 | 1 | 27 | 2.95% | 1679.4 | 3.52% |
| GATA-IR3(Zf)/iTreg-Gata3-ChIP- Seq(GSE20898)/Homer | NNNNNBAGATAWYATCTVHN | 1.00E+00 | -1.61E-01 | 1 | 2 | 0.22% | 176.6 | 0.37% |
| Tbx20(T-box)/Heart-Tbx20-ChIP- Seq(GSE29636)/Homer | GGTGYTGACAGS | 1.00E+00 | -1.58E-01 | 1 | 4 | 0.44% | 315.3 | 0.66% |
| Tbet(T-box)/CD8-Tbet-ChIP- Seq(GSE33802)/Homer | AGGTGTGAAM | 1.00E+00 | -1.57E-01 | 1 | 25 | 2.73% | 1574 | 3.30% |
| Nanog(Homeobox)/mES-Nanog-ChIP- Seq(GSE11724)/Homer | RGCCATTAAC | 1.00E+00 | -1.46E-01 | 1 | 133 | 14.52% | 7537.6 | 15.79% |
| c-Myc/mES-cMyc-ChIP-Seq(GSE11431)/Homer | VVCCACGTGG | 1.00E+00 | -1.45E-01 | 1 | 17 | 1.86% | 1121.5 | 2.35% |
| EKLF(Zf)/Erythrocyte-Klf1-ChIP- Seq(GSE20478)/Homer | NWGGGTGTGGCY | 1.00E+00 | -1.39E-01 | 1 | 6 | 0.66% | 457.9 | 0.96% |
| YY1(Zf)/Promoter/Homer | CAAGATGGCGGC | 1.00E+00 | -1.30E-01 | 1 | 3 | 0.33% | 262.2 | 0.55% |
| EBF(EBF)/proBcell-EBF-ChIP- Seq(GSE21978)/Homer | DGTCCCYRGGGA | 1.00E+00 | -1.29E-01 | 1 | 8 | 0.87% | 591.4 | 1.24% |
| Egr2/Thymocytes-Egr2-ChIP- Seq(GSE34254)/Homer | NGCGTGGGCGGR | 1.00E+00 | -1.28E-01 | 1 | 13 | 1.42% | 900.7 | 1.89% |
| NRF1/Promoter/Homer | STGCGCATGCGC | 1.00E+00 | -1.20E-01 | 1 | 13 | 1.42% | 908.8 | 1.90% |
| c-Jun-CRE(bZIP)/K562-cJun-ChIP- Seq(GSE31477)/Homer | ATGACGTCATCY | 1.00E+00 | -1.15E-01 | 1 | 7 | 0.76% | 539.8 | 1.13% |
| Usf2(HLH)/C2C12-Usf2-ChIP- Seq(GSE36030)/Homer | GTCACGTGGT | 1.00E+00 | -1.04E-01 | 1 | 10 | 1.09% | 740.4 | 1.55% |
| Rfx5(HTH)/GM12878-Rfx5-ChIP- Seq(GSE31477)/Homer | SCCTAGCAACAG | 1.00E+00 | -1.01E-01 | 1 | 8 | 0.87% | 616.4 | 1.29% |
| PBX1(Homeobox)/MCF7-PBX1-ChIP- Seq(GSE28007)/Homer | GSCTGTCACTCA | 1.00E+00 | -9.50E-02 | 1 | 1 | 0.11% | 125.6 | 0.26% |
| NFkB-p65(RHD)/GM12787-p65-ChIP- Seq(GSE19485)/Homer | WGGGGATTTCCC | 1.00E+00 | -9.49E-02 | 1 | 16 | 1.75% | 1120.9 | 2.35% |
| Reverb(NR/DR2)/BLRP(RAW)-Reverba-ChIP- Seq(GSE45914)/Homer | GTRGGTCASTGGGTCA | 1.00E+00 | -7.93E-02 | 1 | 3 | 0.33% | 297.1 | 0.62% |
| Srebp2(HLH)/HepG2-Srebp2-ChIP- Seq(GSE31477)/Homer | CGGTCACSCCAC | 1.00E+00 | -7.51E-02 | 1 | 4 | 0.44% | 374.5 | 0.78% |
| CRE(bZIP)/Promoter/Homer | CSGTGACGTCAC | 1.00E+00 | -7.20E-02 | 1 | 7 | 0.76% | 584.4 | 1.22% |
| RXR(NR/DR1)/3T3L1-RXR-ChIP- Seq(GSE13511)/Homer | TAGGGCAAAGGTCA | 1.00E+00 | -5.25E-02 | 1 | 38 | 4.15% | 2517.7 | 5.27% |
| KLF5(Zf)/LoVo-KLF5-ChIP-Seq(GSE49402)/Homer | DGGGYGKGGC | 1.00E+00 | -4.64E-02 | 1 | 106 | 11.57% | 6396.9 | 13.40% |
| PU.1-IRF(ETS:IRF)/Bcell-PU.1-ChIP- Seq(GSE21512)/Homer | MGGAAGTGAAAC | 1.00E+00 | -3.62E-02 | 1 | 41 | 4.48% | 2757.8 | 5.78% |
| Sp1(Zf)/Promoter/Homer | GGCCCCGCCCCC | 1.00E+00 | -3.26E-02 | 1 | 34 | 3.71% | 2359 | 4.94% |
| E2A(HLH)/proBcell-E2A-ChIP- Seq(GSE21978)/Homer | DNRCAGCTGY | 1.00E+00 | -1.72E-02 | 1 | 70 | 7.64% | 4583 | 9.60% |
| Esrrb(NR)/mES-Esrrb-ChIP- Seq(GSE11431)/Homer | KTGACCTTGA | 1.00E+00 | -1.36E-02 | 1 | 13 | 1.42% | 1152.1 | 2.41% |
| Nr5a2(NR)/mES-Nr5a2-ChIP- Seq(GSE19019)/Homer | BTCAAGGTCA | 1.00E+00 | -9.29E-03 | 1 | 10 | 1.09% | 981.8 | 2.06% |
| NRF1(NRF)/MCF7-NRF1-ChIP- Seq(Unpublished)/Homer | CTGCGCATGCGC | 1.00E+00 | -3.79E-03 | 1 | 8 | 0.87% | 911.6 | 1.91% |
| ZNF143|STAF(Zf)/CUTLL-ZNF143-ChIP- Seq(GSE29600)/Homer | ATTTCCCAGVAKSCY | 1.00E+00 | -1.68E-03 | 1 | 6 | 0.66% | 815.6 | 1.71% |
| Nkx3.1(Homeobox)/LNCaP-Nkx3.1-ChIP- Seq(GSE28264)/Homer | AAGCACTTAA | 1.00E+00 | -1.10E-03 | 1 | 63 | 6.88% | 4625.3 | 9.69% |
| Nr5a2(NR)/Pancreas-LRH1-ChIP- Seq(GSE34295)/Homer | BTCAAGGTCA | 1.00E+00 | -8.03E-04 | 1 | 12 | 1.31% | 1342.8 | 2.81% |
| E2A-nearPU.1(HLH)/Bcell-PU.1-ChIP- Seq(GSE21512)/Homer | NVCACCTGBN | 1.00E+00 | -4.94E-04 | 1 | 53 | 5.79% | 4121.4 | 8.63% |
| PR(NR)/T47D-PR-ChIP-Seq(GSE31130)/Homer | VAGRACAKNCTGTBC | 1.00E+00 | -4.40E-04 | 1 | 47 | 5.13% | 3759.9 | 7.87% |
| CRX(Homeobox)/Retina-Crx-ChIP- Seq(GSE20012)/Homer | GCTAATCC | 1.00E+00 | -5.00E-06 | 1 | 49 | 5.35% | 4404.4 | 9.22% |
| Tbx5(T-box)/HL1-Tbx5.biotin-ChIP- Seq(GSE21529)/Homer | AGGTGTCA | 1.00E+00 | 0.00E+00 | 1 | 96 | 10.48% | 7708.8 | 16.15% |
| GATA-DR8(Zf)/iTreg-Gata3-ChIP- Seq(GSE20898)/Homer | AGATSTNDNNDSAGATAASN | 1.00E+00 | 0.00E+00 | 1 | 0 | 0.00% | 55.9 | 0.12% |
| Pax7-longest(Paired/Homeobox)/Myoblast-Pax7- ChIP-Seq(GSE25064)/Homer | NTAATTDGCYAATTANNWWD | 1.00E+00 | 0.00E+00 | 1 | 0 | 0.00% | 27.7 | 0.06% |
| T1ISRE(IRF)/Ifnb-Exp/Homer | ACTTTCGTTTCT | 1.00E+00 | 0.00E+00 | 1 | 0 | 0.00% | 14.2 | 0.03% |
| CTCF-SatelliteElement/CD4+-CTCF-ChIP- Seq(Barski et al.)/Homer | TGCAGTTCCMVNWRTGGCCA | 1.00E+00 | 0.00E+00 | 1 | 0 | 0.00% | 26.6 | 0.06% |
| EBNA1(EBV virus)/Raji-EBNA1-ChIP- Seq(GSE30709)/Homer | GGYAGCAYDTGCTDCCCNNN | 1.00E+00 | 0.00E+00 | 1 | 0 | 0.00% | 17.4 | 0.04% |
| Pax7-long(Paired/Homeobox)/Myoblast-Pax7-ChIP- Seq(GSE25064)/Homer | TAATCHGATTAC | 1.00E+00 | 0.00E+00 | 1 | 0 | 0.00% | 19.5 | 0.04% |
| Pax7(Paired/Homeobox)/Myoblast-Pax7-ChIP- Seq(GSE25064)/Homer | TAATCAATTA | 1.00E+00 | 0.00E+00 | 1 | 0 | 0.00% | 70.8 | 0.15% |
| GFY-Staf/Promoters/Homer | RACTACAATTCCCAGAAKGC | 1.00E+00 | 0.00E+00 | 1 | 0 | 0.00% | 167.2 | 0.35% |
| GFY(?)/Promoter/Homer | ACTACAATTCCC | 1.00E+00 | 0.00E+00 | 1 | 0 | 0.00% | 220.8 | 0.46% |
| GFX(?)/Promoter/Homer | ATTCTCGCGAGA | 1.00E+00 | 0.00E+00 | 1 | 0 | 0.00% | 45.9 | 0.10% |
| RARg(NR)/ES-RARg-ChIP-Seq(GSE30538)/Homer | AGGTCAAGGTCA | 1.00E+00 | 0.00E+00 | 1 | 0 | 0.00% | 62.5 | 0.13% |
| Hnf1(Homeobox)/Liver-Foxa2-Chip- Seq(GSE25694)/Homer | GGTTAAWCATTAA | 1.00E+00 | 0.00E+00 | 1 | 0 | 0.00% | 102.9 | 0.22% |
