# Supplementary material for: TP53 engagement with the genome occurs in distinct local chromatin environments via pioneer factor activity
Source: HighWire-hosted journal article supplement (doi:10.1101/gr.181883.114), 2014-11-12
Supplement: Table_S8.docx [file Table_S8.docx]

**Table S8: Complete Motif Analysis for p53 Enhancers**

| **Motif Name** | **Consensus** | **P-value** | **Log P-value** | **q-value (Benjamini)** | **# of Target Sequences with Motif(of 1558)** | **% of Target Sequences with Motif** | **# of Background Sequences with Motif(of 47327)** | **% of Background Sequences with Motif** |
| --- | --- | --- | --- | --- | --- | --- | --- | --- |
| p53(p53)/Saos-p53-ChIP- Seq(GSE15780)/Homer | RRCATGYCYRGRCATGYYYN | 1e-557 | -1.28E+03 | 0 | 419 | 26.89% | 260.3 | 0.55% |
| p53(p53)/Saos-p53-ChIP-Seq/Homer | RRCATGYCYRGRCATGYYYN | 1e-557 | -1.28E+03 | 0 | 419 | 26.89% | 260.3 | 0.55% |
| p63(p53)/Keratinocyte-p63-ChIP- Seq(GSE17611)/Homer | NNDRCATGYCYNRRCATGYH | 1e-366 | -8.43E+02 | 0 | 433 | 27.79% | 851.1 | 1.80% |
| p53(p53)/mES-cMyc-ChIP- Seq(GSE11431)/Homer | ACATGCCCGGGCAT | 1.00E-144 | -3.33E+02 | 0 | 104 | 6.68% | 51.1 | 0.11% |
| BATF(bZIP)/Th17-BATF-ChIP- Seq(GSE39756)/Homer | DATGASTCAT | 1.00E-72 | -1.68E+02 | 0 | 210 | 13.48% | 1393.4 | 2.95% |
| AP-1(bZIP)/ThioMac-PU.1-ChIP- Seq(GSE21512)/Homer | VTGACTCATC | 1.00E-69 | -1.59E+02 | 0 | 221 | 14.18% | 1621.8 | 3.43% |
| Atf3(bZIP)/GBM-ATF3-ChIP- Seq(GSE33912)/Homer | DATGASTCATHN | 1.00E-66 | -1.54E+02 | 0 | 202 | 12.97% | 1404 | 2.97% |
| Jun-AP1(bZIP)/K562-cJun-ChIP- Seq(GSE31477)/Homer | GATGASTCATCN | 1.00E-60 | -1.38E+02 | 0 | 115 | 7.38% | 466.8 | 0.99% |
| Bach2(bZIP)/OCILy7-Bach2-ChIP- Seq(GSE44420)/Homer | TGCTGAGTCA | 1.00E-31 | -7.36E+01 | 0 | 76 | 4.88% | 406.4 | 0.86% |
| Tcfcp2l1(CP2)/mES-Tcfcp2l1-ChIP- Seq(GSE11431)/Homer | NRAACCRGTTYRAACCRGYT | 1.00E-25 | -5.79E+01 | 0 | 51 | 3.27% | 226.4 | 0.48% |
| TEAD4(TEA)/Tropoblast-Tead4-ChIP- Seq(GSE37350)/Homer | CCWGGAATGY | 1.00E-22 | -5.08E+01 | 0 | 159 | 10.21% | 2043.7 | 4.32% |
| MafK(bZIP)/C2C12-MafK-ChIP- Seq(GSE36030)/Homer | GCTGASTCAGCA | 1.00E-11 | -2.62E+01 | 0 | 48 | 3.08% | 449.9 | 0.95% |
| Smad4(MAD)/ESC-SMAD4-ChIP- Seq(GSE29422)/Homer | VBSYGTCTGG | 1.00E-10 | -2.34E+01 | 0 | 214 | 13.74% | 4149.1 | 8.77% |
| Nrf2(bZIP)/Lymphoblast-Nrf2-ChIP- Seq(GSE37589)/Homer | HTGCTGAGTCAT | 1.00E-09 | -2.29E+01 | 0 | 20 | 1.28% | 93.5 | 0.20% |
| TEAD(TEA)/Fibroblast-PU.1-ChIP- Seq(Unpublished)/Homer | YCWGGAATGY | 1.00E-09 | -2.16E+01 | 0 | 104 | 6.68% | 1637.3 | 3.46% |
| FOXP1(Forkhead)/H9-FOXP1-ChIP- Seq(GSE31006)/Homer | NYYTGTTTACHN | 1.00E-08 | -2.00E+01 | 0 | 64 | 4.11% | 845.8 | 1.79% |
| Bach1(bZIP)/K562-Bach1-ChIP- Seq(GSE31477)/Homer | AWWNTGCTGAGTCAT | 1.00E-08 | -1.92E+01 | 0 | 18 | 1.16% | 93.8 | 0.20% |
| NF-E2(bZIP)/K562-NFE2-ChIP- Seq(GSE31477)/Homer | GATGACTCAGCA | 1.00E-07 | -1.78E+01 | 0 | 20 | 1.28% | 128 | 0.27% |
| RUNX-AML(Runt)/CD4+-PolII-ChIP- Seq(Barski et al.)/Homer | GCTGTGGTTW | 1.00E-07 | -1.70E+01 | 0 | 90 | 5.78% | 1477.9 | 3.12% |
| FOXA1(Forkhead)/LNCAP-FOXA1-ChIP- Seq(GSE27824)/Homer | WAAGTAAACA | 1.00E-07 | -1.69E+01 | 0 | 139 | 8.92% | 2624.5 | 5.55% |
| Smad2(MAD)/ES-SMAD2-ChIP- Seq(GSE29422)/Homer | CTGTCTGG | 1.00E-06 | -1.55E+01 | 0 | 196 | 12.58% | 4122.4 | 8.71% |
| RUNX(Runt)/HPC7-Runx1-ChIP- Seq(GSE22178)/Homer | SAAACCACAG | 1.00E-06 | -1.53E+01 | 0 | 86 | 5.52% | 1445.2 | 3.06% |
| Smad3(MAD)/NPC-Smad3-ChIP- Seq(GSE36673)/Homer | TWGTCTGV | 1.00E-06 | -1.51E+01 | 0 | 343 | 22.02% | 8064.4 | 17.05% |
| FOXA1(Forkhead)/MCF7-FOXA1-ChIP- Seq(GSE26831)/Homer | WAAGTAAACA | 1.00E-06 | -1.42E+01 | 0 | 111 | 7.12% | 2073.1 | 4.38% |
| ETS1(ETS)/Jurkat-ETS1-ChIP- Seq(GSE17954)/Homer | ACAGGAAGTG | 1.00E-05 | -1.23E+01 | 0 | 115 | 7.38% | 2261.9 | 4.78% |
| RUNX2(Runt)/PCa-RUNX2-ChIP- Seq(GSE33889)/Homer | NWAACCACADNN | 1.00E-05 | -1.20E+01 | 0.0001 | 93 | 5.97% | 1740.2 | 3.68% |
| Foxa2(Forkhead)/Liver-Foxa2-ChIP- Seq(GSE25694)/Homer | CYTGTTTACWYW | 1.00E-05 | -1.18E+01 | 0.0001 | 88 | 5.65% | 1630.3 | 3.45% |
| ERG(ETS)/VCaP-ERG-ChIP- Seq(GSE14097)/Homer | ACAGGAAGTG | 1.00E-05 | -1.17E+01 | 0.0001 | 174 | 11.17% | 3795.3 | 8.02% |
| RUNX1(Runt)/Jurkat-RUNX1-ChIP- Seq(GSE29180)/Homer | AAACCACARM | 1.00E-05 | -1.17E+01 | 0.0001 | 114 | 7.32% | 2268.8 | 4.80% |
| MafA(bZIP)/Islet-MafA-ChIP- Seq(GSE30298)/Homer | TGCTGACTCA | 1.00E-04 | -1.05E+01 | 0.0002 | 92 | 5.91% | 1789.3 | 3.78% |
| Stat3(Stat)/mES-Stat3-ChIP- Seq(GSE11431)/Homer | CTTCCGGGAA | 1.00E-04 | -1.04E+01 | 0.0003 | 56 | 3.59% | 946.1 | 2.00% |
| Foxo1(Forkhead)/RAW-Foxo1-ChIP-Seq(Fan et al.)/Homer | CTGTTTAC | 1.00E-04 | -1.03E+01 | 0.0003 | 211 | 13.54% | 4879.2 | 10.31% |
| Fox:Ebox(Forkhead:HLH)/Panc1-Foxa2-ChIP- Seq(GSE47459)/Homer | NNNVCTGWGYAAACASN | 1.00E-04 | -1.03E+01 | 0.0003 | 104 | 6.68% | 2098 | 4.44% |
| Ets1-distal(ETS)/CD4+-PolII-ChIP-Seq(Barski et al.)/Homer | MACAGGAAGT | 1.00E-04 | -1.00E+01 | 0.0003 | 42 | 2.70% | 649.5 | 1.37% |
| Chop(bZIP)/MEF-Chop-ChIP- Seq(GSE35681)/Homer | ATTGCATCAT | 1.00E-04 | -9.62E+00 | 0.0005 | 32 | 2.05% | 450.9 | 0.95% |
| Atf4(bZIP)/MEF-Atf4-ChIP- Seq(GSE35681)/Homer | MTGATGCAAT | 1.00E-04 | -9.30E+00 | 0.0006 | 38 | 2.44% | 584.9 | 1.24% |
| Bcl6(Zf)/Liver-Bcl6-ChIP- Seq(GSE31578)/Homer | NNNCTTTCCAGGAAA | 1.00E-03 | -9.03E+00 | 0.0008 | 130 | 8.34% | 2834.9 | 5.99% |
| ETV1(ETS)/GIST48-ETV1-ChIP- Seq(GSE22441)/Homer | AACCGGAAGT | 1.00E-03 | -8.69E+00 | 0.0011 | 139 | 8.92% | 3093.5 | 6.54% |
| Fli1(ETS)/CD8-FLI-ChIP- Seq(GSE20898)/Homer | NRYTTCCGGH | 1.00E-03 | -8.55E+00 | 0.0012 | 108 | 6.93% | 2299.4 | 4.86% |
| EWS:ERG-fusion(ETS)/CADO_ES1- EWS:ERG-ChIP-Seq(SRA014231)/Homer | ATTTCCTGTN | 1.00E-03 | -8.44E+00 | 0.0013 | 82 | 5.26% | 1650.8 | 3.49% |
| NFkB-p65-Rel(RHD)/LPS- exp(GSE23622)/Homer | GGAAATTCCC | 1.00E-03 | -8.19E+00 | 0.0017 | 12 | 0.77% | 106.5 | 0.23% |
| STAT4(Stat)/CD4-Stat4-ChIP- Seq(GSE22104)/Homer | NYTTCCWGGAAR | 1.00E-03 | -7.97E+00 | 0.002 | 93 | 5.97% | 1953.6 | 4.13% |
| Gata1(Zf)/K562-GATA1-ChIP- Seq(GSE18829)/Homer | SAGATAAGRV | 1.00E-03 | -7.18E+00 | 0.0044 | 53 | 3.40% | 1005 | 2.12% |
| ELF5(ETS)/T47D-ELF5-ChIP- Seq(GSE30407)/Homer | ACVAGGAAGT | 1.00E-03 | -6.99E+00 | 0.0052 | 75 | 4.81% | 1557.8 | 3.29% |
| CEBP:AP1(bZIP)/ThioMac-CEBPb-ChIP- Seq(GSE21512)/Homer | DRTGTTGCAA | 1.00E-02 | -6.54E+00 | 0.0079 | 79 | 5.07% | 1686.4 | 3.57% |
| BMAL1(HLH)/Liver-Bmal1-ChIP- Seq(GSE39860)/Homer | GNCACGTG | 1.00E-02 | -6.32E+00 | 0.0097 | 210 | 13.48% | 5238.4 | 11.07% |
| EHF(ETS)/LoVo-EHF-ChIP- Seq(GSE49402)/Homer | AVCAGGAAGT | 1.00E-02 | -6.29E+00 | 0.0097 | 123 | 7.89% | 2859.9 | 6.05% |
| ETS:RUNX/Jurkat-RUNX1-ChIP- Seq(GSE17954)/Homer | RCAGGATGTGGT | 1.00E-02 | -6.27E+00 | 0.0097 | 13 | 0.83% | 151 | 0.32% |
| Gata2(Zf)/K562-GATA2-ChIP- Seq(GSE18829)/Homer | BBCTTATCTS | 1.00E-02 | -6.25E+00 | 0.0097 | 57 | 3.66% | 1149.4 | 2.43% |
| EWS:FLI1-fusion(ETS)/SK_N_MC-EWS:FLI1- ChIP-Seq(SRA014231)/Homer | VACAGGAAAT | 1.00E-02 | -6.10E+00 | 0.0111 | 60 | 3.85% | 1232.6 | 2.61% |
| EBF(EBF)/proBcell-EBF-ChIP- Seq(GSE21978)/Homer | DGTCCCYRGGGA | 1.00E-02 | -6.00E+00 | 0.0119 | 27 | 1.73% | 447.2 | 0.95% |
| SPDEF(ETS)/VCaP-SPDEF-ChIP- Seq(SRA014231)/Homer | ASWTCCTGBT | 1.00E-02 | -5.87E+00 | 0.0134 | 97 | 6.23% | 2202.9 | 4.66% |
| Elk1(ETS)/Hela-Elk1-ChIP- Seq(GSE31477)/Homer | HACTTCCGGY | 1.00E-02 | -5.58E+00 | 0.0176 | 44 | 2.82% | 864.6 | 1.83% |
| ZNF143|STAF(Zf)/CUTLL-ZNF143-ChIP- Seq(GSE29600)/Homer | ATTTCCCAGVAKSCY | 1.00E-02 | -5.44E+00 | 0.0197 | 39 | 2.50% | 750 | 1.59% |
| NF1(CTF)/LNCAP-NF1-ChIP- Seq(Unpublished)/Homer | CYTGGCABNSTGCCAR | 1.00E-02 | -5.34E+00 | 0.0215 | 48 | 3.08% | 975.4 | 2.06% |
| HOXA9(Homeobox)/HSC-Hoxa9-ChIP- Seq(GSE33509)/Homer | GGCCATAAATCA | 1.00E-02 | -5.33E+00 | 0.0215 | 60 | 3.85% | 1278.9 | 2.70% |
| GABPA(ETS)/Jurkat-GABPa-ChIP- Seq(GSE17954)/Homer | RACCGGAAGT | 1.00E-02 | -5.30E+00 | 0.0216 | 82 | 5.26% | 1851.6 | 3.91% |
| STAT1(Stat)/HelaS3-STAT1-ChIP- Seq(GSE12782)/Homer | NATTTCCNGGAAAT | 1.00E-02 | -5.28E+00 | 0.0217 | 29 | 1.86% | 519.4 | 1.10% |
| HIF2a(HLH)/785_O-HIF2a-ChIP- Seq(GSE34871)/Homer | GCACGTACCC | 1.00E-02 | -5.26E+00 | 0.0217 | 32 | 2.05% | 590.1 | 1.25% |
| Rfx1(HTH)/NPC-H3K4me1-ChIP- Seq(GSE16256)/Homer | KGTTGCCATGGCAA | 1.00E-02 | -4.96E+00 | 0.0289 | 21 | 1.35% | 348.5 | 0.74% |
| ZFX(Zf)/mES-Zfx-ChIP- Seq(GSE11431)/Homer | AGGCCTRG | 1.00E-02 | -4.79E+00 | 0.0335 | 153 | 9.82% | 3828.1 | 8.09% |
| ELF1(ETS)/Jurkat-ELF1-ChIP- Seq(SRA014231)/Homer | AVCCGGAAGT | 1.00E-02 | -4.66E+00 | 0.0376 | 40 | 2.57% | 813.4 | 1.72% |
| Cdx2(Homeobox)/mES-Cdx2-ChIP- Seq(GSE14586)/Homer | GYMATAAAAH | 1.00E-01 | -4.57E+00 | 0.0405 | 62 | 3.98% | 1381.3 | 2.92% |
| NFkB-p65(RHD)/GM12787-p65-ChIP- Seq(GSE19485)/Homer | WGGGGATTTCCC | 1.00E-01 | -4.31E+00 | 0.0514 | 51 | 3.27% | 1113.7 | 2.35% |
| Unknown-ESC-element/mES-Nanog-ChIP- Seq(GSE11724)/Homer | CACAGCAGGGGG | 1.00E-01 | -4.31E+00 | 0.0514 | 64 | 4.11% | 1453.5 | 3.07% |
| PU.1(ETS)/ThioMac-PU.1-ChIP- Seq(GSE21512)/Homer | AGAGGAAGTG | 1.00E-01 | -4.29E+00 | 0.0514 | 49 | 3.15% | 1063.4 | 2.25% |
| GRHL2(CP2)/HBE-GRHL2-ChIP- Seq(GSE46194)/Homer | AAACYKGTTWDACMRGTTTB | 1.00E-01 | -4.28E+00 | 0.0514 | 37 | 2.37% | 759.5 | 1.61% |
| Elk4(ETS)/Hela-Elk4-ChIP- Seq(GSE31477)/Homer | NRYTTCCGGY | 1.00E-01 | -4.03E+00 | 0.0646 | 39 | 2.50% | 824.9 | 1.74% |
| HIF-1a(HLH)/MCF7-HIF1a-ChIP- Seq(GSE28352)/Homer | TACGTGCV | 1.00E-01 | -4.02E+00 | 0.0646 | 23 | 1.48% | 429.2 | 0.91% |
| EKLF(Zf)/Erythrocyte-Klf1-ChIP- Seq(GSE20478)/Homer | NWGGGTGTGGCY | 1.00E-01 | -4.02E+00 | 0.0646 | 25 | 1.60% | 477.7 | 1.01% |
| NFAT:AP1/Jurkat-NFATC1-ChIP-Seq(Jolma et al.)/Homer | SARTGGAAAAWRTGAGTCAB | 1.00E-01 | -3.77E+00 | 0.0802 | 19 | 1.22% | 345.6 | 0.73% |
| CArG(MADS)/PUER-Srf-ChIP-Seq(Sullivan et al.)/Homer | CCATATATGGNM | 1.00E-01 | -3.73E+00 | 0.0818 | 29 | 1.86% | 589.7 | 1.25% |
| T1ISRE(IRF)/Ifnb-Exp/Homer | ACTTTCGTTTCT | 1.00E-01 | -3.66E+00 | 0.0866 | 3 | 0.19% | 19.4 | 0.04% |
| USF1(HLH)/GM12878-Usf1-ChIP- Seq(GSE32465)/Homer | SGTCACGTGR | 1.00E-01 | -3.37E+00 | 0.114 | 41 | 2.63% | 918.4 | 1.94% |
| KLF5(Zf)/LoVo-KLF5-ChIP- Seq(GSE49402)/Homer | DGGGYGKGGC | 1.00E-01 | -3.25E+00 | 0.1278 | 115 | 7.38% | 2956.1 | 6.25% |
| Rfx2(HTH)/LoVo-RFX2-ChIP- Seq(GSE49402)/Homer | GTTGCCATGGCAACM | 1.00E-01 | -3.24E+00 | 0.1278 | 9 | 0.58% | 136.1 | 0.29% |
| Stat3+il21(Stat)/CD4-Stat3-ChIP- Seq(GSE19198)/Homer | SVYTTCCNGGAARB | 1.00E-01 | -3.20E+00 | 0.1307 | 58 | 3.72% | 1385.7 | 2.93% |
| TRa(NR)/C17.2-TRa-ChIP- Seq(GSE38347)/Homer | GGTCANYTGAGGWCA | 1.00E-01 | -3.08E+00 | 0.1445 | 61 | 3.92% | 1477.8 | 3.12% |
| HRE(HSF)/Striatum-HSF1-ChIP- Seq(GSE38000)/Homer | TTCTAGAABNTTCTA | 1.00E-01 | -3.05E+00 | 0.1474 | 17 | 1.09% | 327.2 | 0.69% |
| Foxh1(Forkhead)/hESC-FOXH1-ChIP- Seq(GSE29422)/Homer | NNTGTGGATTSS | 1.00E-01 | -2.98E+00 | 0.1557 | 50 | 3.21% | 1188.7 | 2.51% |
| BORIS(Zf)/K562-CTCFL-ChIP- Seq(GSE32465)/Homer | CNNBRGCGCCCCCTGSTGG C | 1.00E-01 | -2.95E+00 | 0.1583 | 14 | 0.90% | 259.3 | 0.55% |
| Gata4(Zf)/Heart-Gata4-ChIP- Seq(GSE35151)/Homer | NBWGATAAGR | 1.00E-01 | -2.94E+00 | 0.1585 | 76 | 4.88% | 1904.1 | 4.03% |
| EBF1(EBF)/Near-E2A-ChIP- Seq(GSE21512)/Homer | GTCCCCWGGGGA | 1.00E-01 | -2.91E+00 | 0.1611 | 107 | 6.87% | 2775 | 5.87% |
| Hoxc9(Homeobox)/Ainv15-Hoxc9-ChIP- Seq(GSE21812)/Homer | GGCCATAAATCA | 1.00E-01 | -2.74E+00 | 0.1894 | 39 | 2.50% | 913.5 | 1.93% |
| Maz(Zf)/HepG2-Maz-ChIP- Seq(GSE31477)/Homer | GGGGGGGG | 1.00E-01 | -2.72E+00 | 0.1902 | 106 | 6.80% | 2773.1 | 5.86% |
| NFAT(RHD)/Jurkat-NFATC1-ChIP-Seq(Jolma et al.)/Homer | ATTTTCCATT | 1.00E-01 | -2.70E+00 | 0.1926 | 76 | 4.88% | 1932.6 | 4.09% |
| Max(HLH)/K562-Max-ChIP- Seq(GSE31477)/Homer | RCCACGTGGYYN | 1.00E-01 | -2.61E+00 | 0.2079 | 61 | 3.92% | 1525.6 | 3.23% |
| NF1:FOXA1/LNCAP-FOXA1-ChIP- Seq(GSE27824)/Homer | WNTGTTTRYTTTGGCA | 1.00E-01 | -2.59E+00 | 0.2095 | 7 | 0.45% | 110.5 | 0.23% |
| PAX5- shortForm(Paired/Homeobox)/GM12878- PAX5-ChIP-Seq(GSE32465)/Homer | GTCACGCTCSCTGM | 1.00E-01 | -2.56E+00 | 0.2128 | 13 | 0.83% | 251.3 | 0.53% |
| Pax8(Paired/Homeobox)/Thyroid-Pax8-ChIP- Seq(GSE26938)/Homer | GTCATGCHTGRCTGS | 1.00E-01 | -2.54E+00 | 0.2165 | 41 | 2.63% | 984.1 | 2.08% |
| Reverb(NR/DR2)/BLRP(RAW)-Reverba-ChIP- Seq(GSE45914)/Homer | GTRGGTCASTGGGTCA | 1.00E-01 | -2.49E+00 | 0.2246 | 17 | 1.09% | 354.2 | 0.75% |
| CHR/Cell-Cycle-Exp/Homer | SRGTTTCAAA | 1.00E-01 | -2.40E+00 | 0.2436 | 47 | 3.02% | 1161.8 | 2.46% |
| STAT6/Macrophage-Stat6-ChIP- Seq(GSE38377)/Homer | TTCCKNAGAA | 1.00E-01 | -2.38E+00 | 0.2446 | 41 | 2.63% | 998.2 | 2.11% |
| X-box(HTH)/NPC-H3K4me1-ChIP- Seq(GSE16256)/Homer | GGTTGCCATGGCAA | 1.00E-01 | -2.36E+00 | 0.2483 | 10 | 0.64% | 187.5 | 0.40% |
| Klf4(Zf)/mES-Klf4-ChIP- Seq(GSE11431)/Homer | GCCACACCCA | 1.00E-01 | -2.35E+00 | 0.2483 | 36 | 2.31% | 865.1 | 1.83% |
| n-Myc(HLH)/mES-nMyc-ChIP- Seq(GSE11431)/Homer | VRCCACGTGG | 1.00E-01 | -2.31E+00 | 0.2544 | 60 | 3.85% | 1531.5 | 3.24% |
| STAT6(Stat)/CD4-Stat6-ChIP- Seq(GSE22104)/Homer | ABTTCYYRRGAA | 1.00E+00 | -2.28E+00 | 0.2602 | 39 | 2.50% | 953.4 | 2.02% |
| Ap4(HLH)/AML-Tfap4-ChIP- Seq(GSE45738)/Homer | NAHCAGCTGD | 1.00E+00 | -2.22E+00 | 0.2741 | 119 | 7.64% | 3224.5 | 6.82% |
| GATA:SCL/Ter119-SCL-ChIP- Seq(GSE18720)/Homer | CRGCTGBNGNSNNSAGATAA | 1.00E+00 | -2.19E+00 | 0.2774 | 12 | 0.77% | 243.9 | 0.52% |
| GATA3(Zf)/iTreg-Gata3-ChIP- Seq(GSE20898)/Homer | AGATAASR | 1.00E+00 | -2.11E+00 | 0.2972 | 117 | 7.51% | 3184.6 | 6.73% |
| E-box(HLH)/Promoter/Homer | SSGGTCACGTGA | 1.00E+00 | -2.09E+00 | 0.3024 | 6 | 0.39% | 102.1 | 0.22% |
| RFX(HTH)/K562-RFX3-ChIP- Seq(SRA012198)/Homer | CGGTTGCCATGGCAAC | 1.00E+00 | -2.04E+00 | 0.3143 | 7 | 0.45% | 127.4 | 0.27% |
| ZNF711(Zf)/SH-SY5Y-ZNF711-ChIP- Seq(GSE20673)/Homer | AGGCCTAG | 1.00E+00 | -2.02E+00 | 0.3184 | 191 | 12.26% | 5361.1 | 11.33% |
| GLI3(Zf)/GLI3-ChIP-Chip(GSE11077)/Homer | CGTGGGTGGTCC | 1.00E+00 | -1.92E+00 | 0.347 | 11 | 0.71% | 231.1 | 0.49% |
| Egr2/Thymocytes-Egr2-ChIP- Seq(GSE34254)/Homer | NGCGTGGGCGGR | 1.00E+00 | -1.91E+00 | 0.347 | 10 | 0.64% | 206.3 | 0.44% |
| Mef2c(MADS)/GM12878-Mef2c-ChIP- Seq(GSE32465)/Homer | DCYAAAAATAGM | 1.00E+00 | -1.91E+00 | 0.347 | 58 | 3.72% | 1525.5 | 3.22% |
| Rbpj1(?)/Panc1-Rbpj1-ChIP- Seq(GSE47459)/Homer | HTTTCCCASG | 1.00E+00 | -1.88E+00 | 0.35 | 129 | 8.28% | 3576.3 | 7.56% |
| ETS(ETS)/Promoter/Homer | AACCGGAAGT | 1.00E+00 | -1.83E+00 | 0.3654 | 21 | 1.35% | 501.2 | 1.06% |
| STAT5(Stat)/mCD4+-Stat5-ChIP- Seq(GSE12346)/Homer | RTTTCTNAGAAA | 1.00E+00 | -1.83E+00 | 0.3654 | 25 | 1.60% | 610.6 | 1.29% |
| Oct4:Sox17/F9-Sox17-ChIP- Seq(GSE44553)/Homer | CCATTGTATGCAAAT | 1.00E+00 | -1.75E+00 | 0.3888 | 12 | 0.77% | 266.6 | 0.56% |
| Pdx1(Homeobox)/Islet-Pdx1-ChIP- Seq(SRA008281)/Homer | YCATYAATCA | 1.00E+00 | -1.70E+00 | 0.4061 | 74 | 4.75% | 2014.4 | 4.26% |
| Tlx?(NR)/NPC-H3K4me1-ChIP- Seq(GSE16256)/Homer | CTGGCAGSCTGCCA | 1.00E+00 | -1.67E+00 | 0.4117 | 45 | 2.89% | 1187 | 2.51% |
| c-Myc(HLH)/LNCAP-cMyc-ChIP- Seq(unpublished)/Homer | VCCACGTG | 1.00E+00 | -1.58E+00 | 0.45 | 28 | 1.80% | 717 | 1.52% |
| AR-halfsite(NR)/LNCaP-AR-ChIP- Seq(GSE27824)/Homer | CCAGGAACAG | 1.00E+00 | -1.57E+00 | 0.45 | 377 | 24.20% | 11020 | 23.30% |
| bHLHE40(HLH)/HepG2-BHLHE40-ChIP- Seq(GSE31477)/Homer | KCACGTGMCN | 1.00E+00 | -1.54E+00 | 0.4598 | 23 | 1.48% | 581.5 | 1.23% |
| Arnt:Ahr(bHLH)/MCF7-Arnt-ChIP-Seq(Lo et al.)/Homer | TBGCACGCAA | 1.00E+00 | -1.53E+00 | 0.4613 | 47 | 3.02% | 1263.6 | 2.67% |
| CRE(bZIP)/Promoter/Homer | CSGTGACGTCAC | 1.00E+00 | -1.43E+00 | 0.5045 | 14 | 0.90% | 341.6 | 0.72% |
| PAX3:FKHR-fusion(Paired/Homeobox)/Rh4- PAX3:FKHR-ChIP-Seq(GSE19063)/Homer | ACCRTGACTAATTNN | 1.00E+00 | -1.41E+00 | 0.5096 | 15 | 0.96% | 370.8 | 0.78% |
| PAX5(Paired/Homeobox)/GM12878-PAX5- ChIP-Seq(GSE32465)/Homer | GCAGCCAAGCRTGACH | 1.00E+00 | -1.38E+00 | 0.5197 | 36 | 2.31% | 967.8 | 2.05% |
| c-Myc/mES-cMyc-ChIP- Seq(GSE11431)/Homer | VVCCACGTGG | 1.00E+00 | -1.37E+00 | 0.5208 | 43 | 2.76% | 1170.8 | 2.48% |
| NPAS2(HLH)/Liver-NPAS2-ChIP- Seq(GSE39860)/Homer | KCCACGTGAC | 1.00E+00 | -1.25E+00 | 0.584 | 109 | 7.00% | 3130.6 | 6.62% |
| CTCF(Zf)/CD4+-CTCF-ChIP-Seq(Barski et al.)/Homer | AYAGTGCCMYCTRGTGGCCA | 1.00E+00 | -1.21E+00 | 0.6017 | 7 | 0.45% | 164.5 | 0.35% |
| Six1(Homeobox)/Myoblast-Six1-ChIP- Chip(GSE20150)/Homer | GKVTCADRTTWC | 1.00E+00 | -1.20E+00 | 0.6055 | 17 | 1.09% | 445.6 | 0.94% |
| PRDM1/BMI1(Zf)/Hela-PRDM1-ChIP- Seq(GSE31477)/Homer | ACTTTCACTTTC | 1.00E+00 | -1.15E+00 | 0.6289 | 38 | 2.44% | 1058.2 | 2.24% |
| Tcf3(HMG)/mES-Tcf3-ChIP- Seq(GSE11724)/Homer | ASWTCAAAGG | 1.00E+00 | -1.12E+00 | 0.643 | 16 | 1.03% | 424.8 | 0.90% |
| TATA-Box(TBP)/Promoter/Homer | CCTTTTAWAGSC | 1.00E+00 | -1.12E+00 | 0.643 | 96 | 6.16% | 2777.6 | 5.87% |
| NRF1/Promoter/Homer | STGCGCATGCGC | 1.00E+00 | -1.08E+00 | 0.6584 | 8 | 0.51% | 200.3 | 0.42% |
| PPARE(NR/DR1)/3T3L1-Pparg-ChIP- Seq(GSE13511)/Homer | TGACCTTTGCCCCA | 1.00E+00 | -1.03E+00 | 0.6854 | 78 | 5.01% | 2263.5 | 4.79% |
| HNF4a(NR/DR1)/HepG2-HNF4a-ChIP- Seq(GSE25021)/Homer | CARRGKBCAAAGTYCA | 1.00E+00 | -9.75E-01 | 0.7192 | 35 | 2.25% | 998 | 2.11% |
| Egr1(Zf)/K562-Egr1-ChIP- Seq(GSE32465)/Homer | TGCGTGGGYG | 1.00E+00 | -9.66E-01 | 0.7203 | 42 | 2.70% | 1207.2 | 2.55% |
| FOXA1:AR/LNCAP-AR-ChIP- Seq(GSE27824)/Homer | AGTAAACAAAAAAGAACAND | 1.00E+00 | -9.54E-01 | 0.7233 | 6 | 0.39% | 152.4 | 0.32% |
| Gfi1b(Zf)/HPC7-Gfi1b-ChIP- Seq(GSE22178)/Homer | MAATCACTGC | 1.00E+00 | -9.51E-01 | 0.7233 | 64 | 4.11% | 1865.4 | 3.94% |
| PU.1-IRF(ETS:IRF)/Bcell-PU.1-ChIP- Seq(GSE21512)/Homer | MGGAAGTGAAAC | 1.00E+00 | -8.99E-01 | 0.7526 | 105 | 6.74% | 3107.8 | 6.57% |
| GFY(?)/Promoter/Homer | ACTACAATTCCC | 1.00E+00 | -8.84E-01 | 0.7588 | 5 | 0.32% | 128.5 | 0.27% |
| CLOCK(HLH)/Liver-Clock-ChIP- Seq(GSE39860)/Homer | GHCACGTG | 1.00E+00 | -8.75E-01 | 0.7599 | 40 | 2.57% | 1165.2 | 2.46% |
| IRF2(IRF)/Erythroblas-IRF2-ChIP- Seq(GSE36985)/Homer | GAAASYGAAASY | 1.00E+00 | -8.69E-01 | 0.7599 | 7 | 0.45% | 187.4 | 0.40% |
| NFkB-p50,p52(RHD)/p50-ChIP- Chip(Schreiber et al.)/Homer | GGGGGAATCCCC | 1.00E+00 | -8.60E-01 | 0.76 | 8 | 0.51% | 217.9 | 0.46% |
| EBNA1(EBV virus)/Raji-EBNA1-ChIP- Seq(GSE30709)/Homer | GGYAGCAYDTGCTDCCCNNN | 1.00E+00 | -8.55E-01 | 0.76 | 2 | 0.13% | 44.5 | 0.09% |
| Esrrb(NR)/mES-Esrrb-ChIP- Seq(GSE11431)/Homer | KTGACCTTGA | 1.00E+00 | -8.09E-01 | 0.7885 | 50 | 3.21% | 1479.7 | 3.13% |
| CEBP(bZIP)/CEBPb-ChIP- Seq(GSE21512)/Homer | ATTGCGCAAC | 1.00E+00 | -7.64E-01 | 0.8186 | 57 | 3.66% | 1701.5 | 3.60% |
| RXR(NR/DR1)/3T3L1-RXR-ChIP- Seq(GSE13511)/Homer | TAGGGCAAAGGTCA | 1.00E+00 | -7.56E-01 | 0.8191 | 92 | 5.91% | 2761 | 5.84% |
| Nur77(NR)/K562-NR4A1-ChIP- Seq(GSE31363)/Homer | TGACCTTTNCNT | 1.00E+00 | -6.92E-01 | 0.8673 | 11 | 0.71% | 324.3 | 0.69% |
| Tcf12(HLH)/GM12878-Tcf12-ChIP- Seq(GSE32465)/Homer | VCAGCTGYTG | 1.00E+00 | -6.83E-01 | 0.8685 | 84 | 5.39% | 2543.7 | 5.38% |
| JunD(bZIP)/K562-JunD-ChIP-Seq/Homer | ATGACGTCATCN | 1.00E+00 | -6.67E-01 | 0.8772 | 5 | 0.32% | 144.5 | 0.31% |
| Olig2(bHLH)/Neuron-Olig2-ChIP- Seq(GSE30882)/Homer | RCCATMTGTT | 1.00E+00 | -6.64E-01 | 0.8772 | 177 | 11.36% | 5377.4 | 11.37% |
| TR4(NR/DR1)/Hela-TR4-ChIP- Seq(GSE24685)/Homer | GAGGTCAAAGGTCA | 1.00E+00 | -6.63E-01 | 0.8772 | 8 | 0.51% | 236.2 | 0.50% |
| Hnf1(Homeobox)/Liver-Foxa2-Chip- Seq(GSE25694)/Homer | GGTTAAWCATTAA | 1.00E+00 | -6.58E-01 | 0.8772 | 7 | 0.45% | 206.1 | 0.44% |
| GATA-DR4(Zf)/iTreg-Gata3-ChIP- Seq(GSE20898)/Homer | AGATGKDGAGATAAG | 1.00E+00 | -6.43E-01 | 0.8772 | 5 | 0.32% | 146.2 | 0.31% |
| SCL(HLH)/HPC7-Scl-ChIP- Seq(GSE13511)/Homer | AVCAGCTG | 1.00E+00 | -6.43E-01 | 0.8772 | 453 | 29.08% | 13777 | 29.12% |
| Lhx3(Homeobox)/Neuron-Lhx3-ChIP- Seq(GSE31456)/Homer | ADBTAATTAR | 1.00E+00 | -6.36E-01 | 0.8772 | 111 | 7.12% | 3382.7 | 7.15% |
| HOXA2(Homeobox)/mES-Hoxa2-ChIP- Seq(Donaldson et al.)/Homer | GYCATCMATCAT | 1.00E+00 | -6.21E-01 | 0.8772 | 6 | 0.39% | 179.3 | 0.38% |
| HRE(HSF)/HepG2-HSF1-ChIP- Seq(GSE31477)/Homer | BSTTCTRGAABVTTCYAGAA | 1.00E+00 | -5.85E-01 | 0.9016 | 8 | 0.51% | 245.6 | 0.52% |
| Atf1(bZIP)/K562-ATF1-ChIP- Seq(GSE31477)/Homer | GATGACGTCA | 1.00E+00 | -5.84E-01 | 0.9016 | 59 | 3.79% | 1814.3 | 3.84% |
| c-Jun-CRE(bZIP)/K562-cJun-ChIP- Seq(GSE31477)/Homer | ATGACGTCATCY | 1.00E+00 | -5.56E-01 | 0.9166 | 24 | 1.54% | 746.4 | 1.58% |
| Erra(NR)/HepG2-Erra-ChIP- Seq(GSE31477)/Homer | CAAAGGTCAG | 1.00E+00 | -5.38E-01 | 0.9266 | 200 | 12.84% | 6146.1 | 12.99% |
| RBPJ:Ebox/Panc1-Rbpj1-ChIP- Seq(GSE47459)/Homer | GGGRAARRGRMCAGMTG | 1.00E+00 | -5.24E-01 | 0.9335 | 24 | 1.54% | 753.4 | 1.59% |
| Mef2a(MADS)/HL1-Mef2a.biotin-ChIP- Seq(GSE21529/Homer | CYAAAAATAG | 1.00E+00 | -5.18E-01 | 0.9339 | 45 | 2.89% | 1405.6 | 2.97% |
| GATA-IR4(Zf)/iTreg-Gata3-ChIP- Seq(GSE20898)/Homer | NAGATWNBNATCTNN | 1.00E+00 | -5.14E-01 | 0.9339 | 3 | 0.19% | 94 | 0.20% |
| HOXD13(Homeobox)/Chicken-Hoxd13-ChIP- Seq(GSE38910)/Homer | NCYAATAAAA | 1.00E+00 | -4.92E-01 | 0.9464 | 74 | 4.75% | 2309.8 | 4.88% |
| ERE(NR/IR3)/MCF7-ERa-ChIP- Seq(Unpublished)/Homer | VAGGTCACNSTGACC | 1.00E+00 | -4.89E-01 | 0.9464 | 19 | 1.22% | 605.4 | 1.28% |
| NRF1(NRF)/MCF7-NRF1-ChIP- Seq(Unpublished)/Homer | CTGCGCATGCGC | 1.00E+00 | -4.88E-01 | 0.9464 | 2 | 0.13% | 64 | 0.14% |
| Usf2(HLH)/C2C12-Usf2-ChIP- Seq(GSE36030)/Homer | GTCACGTGGT | 1.00E+00 | -4.85E-01 | 0.9464 | 23 | 1.48% | 731.1 | 1.55% |
| GRE(NR/IR3)/A549-GR-ChIP- Seq(GSE32465)/Homer | NRGVACABNVTGTYCY | 1.00E+00 | -4.28E-01 | 0.9841 | 8 | 0.51% | 267.3 | 0.57% |
| AP-2alpha(AP2)/Hela-AP2alpha-ChIP- Seq(GSE31477)/Homer | ATGCCCTGAGGC | 1.00E+00 | -4.09E-01 | 0.9963 | 66 | 4.24% | 2097.1 | 4.43% |
| Tbx20(T-box)/Heart-Tbx20-ChIP- Seq(GSE29636)/Homer | GGTGYTGACAGS | 1.00E+00 | -3.90E-01 | 1 | 13 | 0.83% | 436.9 | 0.92% |
| AP-2gamma(AP2)/MCF7-TFAP2C-ChIP- Seq(GSE21234)/Homer | SCCTSAGGSCAW | 1.00E+00 | -3.82E-01 | 1 | 87 | 5.58% | 2763.3 | 5.84% |
| GATA-IR3(Zf)/iTreg-Gata3-ChIP- Seq(GSE20898)/Homer | NNNNNBAGATAWYATCTVHN | 1.00E+00 | -3.54E-01 | 1 | 8 | 0.51% | 280.9 | 0.59% |
| Znf263(Zf)/K562-Znf263-ChIP- Seq(GSE31477)/Homer | CVGTSCTCCC | 1.00E+00 | -3.30E-01 | 1 | 156 | 10.01% | 4936.1 | 10.43% |
| Tbet(T-box)/CD8-Tbet-ChIP- Seq(GSE33802)/Homer | AGGTGTGAAM | 1.00E+00 | -3.19E-01 | 1 | 80 | 5.13% | 2581.3 | 5.46% |
| BMYB(HTH)/Hela-BMYB- ChIPSeq(GSE27030)/Homer | NHAACBGYYV | 1.00E+00 | -3.14E-01 | 1 | 102 | 6.55% | 3271.5 | 6.92% |
| Sox6(HMG)/Myotubes-Sox6-ChIP- Seq(GSE32627)/Homer | CCATTGTTNY | 1.00E+00 | -3.12E-01 | 1 | 121 | 7.77% | 3864.6 | 8.17% |
| ARE(NR)/LNCAP-AR-ChIP- Seq(GSE27824)/Homer | RGRACASNSTGTYCYB | 1.00E+00 | -3.10E-01 | 1 | 15 | 0.96% | 521.1 | 1.10% |
| Lhx2(Homeobox)/HFSC-Lhx2-ChIP- Seq(GSE48068)/Homer | TAATTAGN | 1.00E+00 | -3.09E-01 | 1 | 63 | 4.04% | 2053.3 | 4.34% |
| CEBP:CEBP(bZIP)/MEF-Chop-ChIP- Seq(GSE35681)/Homer | NTNATGCAAYMNNHTGMAAY | 1.00E+00 | -2.97E-01 | 1 | 10 | 0.64% | 359.7 | 0.76% |
| OCT4-SOX2-TCF- NANOG((POU/Homeobox/HMG)/mES-Oct4- ChIP-Seq(GSE11431)/Homer | ATTTGCATAACAATG | 1.00E+00 | -2.74E-01 | 1 | 8 | 0.51% | 297.2 | 0.63% |
| Rfx5(HTH)/GM12878-Rfx5-ChIP- Seq(GSE31477)/Homer | SCCTAGCAACAG | 1.00E+00 | -2.73E-01 | 1 | 20 | 1.28% | 697.7 | 1.48% |
| NeuroD1(bHLH)/Islet-NeuroD1-ChIP- Seq(GSE30298)/Homer | GCCATCTGTT | 1.00E+00 | -2.59E-01 | 1 | 66 | 4.24% | 2178.8 | 4.61% |
| bZIP:IRF/Th17-BatF-ChIP- Seq(GSE39756)/Homer | NAGTTTCABTHTGACTNW | 1.00E+00 | -2.35E-01 | 1 | 25 | 1.60% | 876.5 | 1.85% |
| TCFL2(HMG)/K562-TCF7L2-ChIP- Seq(GSE29196)/Homer | ACWTCAAAGG | 1.00E+00 | -1.98E-01 | 1 | 3 | 0.19% | 135.1 | 0.29% |
| AMYB(HTH)/Testes-AMYB-ChIP- Seq(GSE44588)/Homer | TGGCAGTTGG | 1.00E+00 | -1.94E-01 | 1 | 106 | 6.80% | 3495 | 7.39% |
| CRX(Homeobox)/Retina-Crx-ChIP- Seq(GSE20012)/Homer | GCTAATCC | 1.00E+00 | -1.92E-01 | 1 | 218 | 13.99% | 7002.8 | 14.80% |
| Tcf4(HMG)/Hct116-Tcf4-ChIP- Seq(SRA012054)/Homer | ASATCAAAGGVA | 1.00E+00 | -1.92E-01 | 1 | 24 | 1.54% | 864.5 | 1.83% |
| IRF4(IRF)/GM12878-IRF4-ChIP- Seq(GSE32465)/Homer | ACTGAAACCA | 1.00E+00 | -1.79E-01 | 1 | 24 | 1.54% | 871.5 | 1.84% |
| IRF1(IRF)/PBMC-IRF1-ChIP- Seq(GSE43036)/Homer | GAAAGTGAAAGT | 1.00E+00 | -1.77E-01 | 1 | 6 | 0.39% | 253.6 | 0.54% |
| GATA-DR8(Zf)/iTreg-Gata3-ChIP- Seq(GSE20898)/Homer | AGATSTNDNNDSAGATAASN | 1.00E+00 | -1.73E-01 | 1 | 2 | 0.13% | 100.8 | 0.21% |
| Nr5a2(NR)/mES-Nr5a2-ChIP- Seq(GSE19019)/Homer | BTCAAGGTCA | 1.00E+00 | -1.73E-01 | 1 | 34 | 2.18% | 1206.7 | 2.55% |
| NF1-halfsite(CTF)/LNCaP-NF1-ChIP- Seq(Unpublished)/Homer | YTGCCAAG | 1.00E+00 | -1.58E-01 | 1 | 146 | 9.37% | 4798.6 | 10.14% |
| MyoG(HLH)/C2C12-MyoG-ChIP- Seq(GSE36024)/Homer | AACAGCTG | 1.00E+00 | -1.50E-01 | 1 | 83 | 5.33% | 2812 | 5.94% |
| Myf5(bHLH)/GM-Myf5-ChIP- Seq(GSE24852)/Homer | BAACAGCTGT | 1.00E+00 | -1.49E-01 | 1 | 53 | 3.40% | 1846 | 3.90% |
| Unknown(Homeobox)/Limb-p300-ChIP- Seq/Homer | SSCMATWAAA | 1.00E+00 | -1.48E-01 | 1 | 39 | 2.50% | 1389.9 | 2.94% |
| Sox2(HMG)/mES-Sox2-ChIP- Seq(GSE11431)/Homer | BCCATTGTTC | 1.00E+00 | -1.47E-01 | 1 | 58 | 3.72% | 2009 | 4.25% |
| ISRE(IRF)/ThioMac-LPS- exp(GSE23622)/HOMER | AGTTTCASTTTC | 1.00E+00 | -1.47E-01 | 1 | 2 | 0.13% | 106.4 | 0.22% |
| YY1(Zf)/Promoter/Homer | CAAGATGGCGGC | 1.00E+00 | -1.45E-01 | 1 | 3 | 0.19% | 148.8 | 0.31% |
| Pitx1(Homeobox)/Chicken-Pitx1-ChIP- Seq(GSE38910)/Homer | TAATCCCN | 1.00E+00 | -1.45E-01 | 1 | 397 | 25.48% | 12622.9 | 26.69% |
| GFY-Staf/Promoters/Homer | RACTACAATTCCCAGAAKGC | 1.00E+00 | -1.44E-01 | 1 | 1 | 0.06% | 61 | 0.13% |
| Pbx3(Homeobox)/GM12878-PBX3-ChIP- Seq(GSE32465)/Homer | SCTGTCAMTCAN | 1.00E+00 | -1.38E-01 | 1 | 12 | 0.77% | 484.6 | 1.02% |
| PBX1(Homeobox)/MCF7-PBX1-ChIP- Seq(GSE28007)/Homer | GSCTGTCACTCA | 1.00E+00 | -1.35E-01 | 1 | 3 | 0.19% | 151.8 | 0.32% |
| PRDM14(Zf)/H1-PRDM14-ChIP- Seq(GSE22767)/Homer | RGGTCTCTAACY | 1.00E+00 | -1.31E-01 | 1 | 15 | 0.96% | 593.3 | 1.25% |
| MyoD(HLH)/Myotube-MyoD-ChIP- Seq(GSE21614)/Homer | RRCAGCTGYTSY | 1.00E+00 | -1.22E-01 | 1 | 54 | 3.47% | 1905.3 | 4.03% |
| GRE/RAW264.7-GRE-ChIP- Seq(Unpublished)/Homer | VAGRACAKWCTGTYC | 1.00E+00 | -1.05E-01 | 1 | 11 | 0.71% | 467.9 | 0.99% |
| Atoh1(bHLH)/Cerebellum-Atoh1-ChIP- Seq(GSE22111)/Homer | VNRVCAGCTGGY | 1.00E+00 | -1.01E-01 | 1 | 86 | 5.52% | 2972.8 | 6.28% |
| E2F6(E2F)/Hela-E2F6-ChIP- Seq(GSE31477)/Homer | GGCGGGAARN | 1.00E+00 | -9.82E-02 | 1 | 18 | 1.16% | 721.6 | 1.53% |
| Oct4(POU/Homeobox)/mES-Oct4-ChIP- Seq(GSE11431)/Homer | ATTTGCATAW | 1.00E+00 | -9.56E-02 | 1 | 26 | 1.67% | 1000.8 | 2.12% |
| RARg(NR)/ES-RARg-ChIP- Seq(GSE30538)/Homer | AGGTCAAGGTCA | 1.00E+00 | -8.82E-02 | 1 | 1 | 0.06% | 75.4 | 0.16% |
| Nkx6.1(Homeobox)/Islet-Nkx6.1-ChIP- Seq(GSE40975)/Homer | GKTAATGR | 1.00E+00 | -8.38E-02 | 1 | 187 | 12.00% | 6227.1 | 13.16% |
| VDR(NR/DR3)/GM10855-VDR+vitD-ChIP- Seq(GSE22484)/Homer | ARAGGTCANWGAGTTCANN N | 1.00E+00 | -8.03E-02 | 1 | 10 | 0.64% | 448.1 | 0.95% |
| E2F1(E2F)/Hela-E2F1-ChIP- Seq(GSE22478)/Homer | CWGGCGGGAA | 1.00E+00 | -8.00E-02 | 1 | 5 | 0.32% | 257 | 0.54% |
| MYB(HTH)/ERMYB-Myb- ChIPSeq(GSE22095)/Homer | GGCVGTTR | 1.00E+00 | -7.18E-02 | 1 | 111 | 7.12% | 3834.3 | 8.11% |
| Oct2(POU/Homeobox)/Bcell-Oct2-ChIP- Seq(GSE21512)/Homer | ATATGCAAAT | 1.00E+00 | -7.14E-02 | 1 | 15 | 0.96% | 639.3 | 1.35% |
| LXRE(NR/DR4)/BLRP(RAW)-LXRb-ChIP- Seq(GSE21512)/Homer | RGGTTACTANAGGTCA | 1.00E+00 | -6.43E-02 | 1 | 9 | 0.58% | 424.5 | 0.90% |
| E2F4(E2F)/K562-E2F4-ChIP- Seq(GSE31477)/Homer | GGCGGGAAAH | 1.00E+00 | -6.09E-02 | 1 | 11 | 0.71% | 503.2 | 1.06% |
| PR(NR)/T47D-PR-ChIP- Seq(GSE31130)/Homer | VAGRACAKNCTGTBC | 1.00E+00 | -5.84E-02 | 1 | 157 | 10.08% | 5346.7 | 11.30% |
| Hoxb4(Homeobox)/ES-Hoxb4-ChIP- Seq(GSE34014)/Homer | TGATTRATGGCY | 1.00E+00 | -5.55E-02 | 1 | 8 | 0.51% | 394.4 | 0.83% |
| Nr5a2(NR)/Pancreas-LRH1-ChIP- Seq(GSE34295)/Homer | BTCAAGGTCA | 1.00E+00 | -5.45E-02 | 1 | 45 | 2.89% | 1704.1 | 3.60% |
| FXR(NR/IR1)/Liver-FXR-ChIP-Seq(Chong et al.)/Homer | AGGTCANTGACCTB | 1.00E+00 | -5.09E-02 | 1 | 24 | 1.54% | 987.8 | 2.09% |
| PRDM9(Zf)/Testis-DMC1-ChIP- Seq(GSE35498)/Homer | ADGGYAGYAGCATCT | 1.00E+00 | -5.03E-02 | 1 | 22 | 1.41% | 917 | 1.94% |
| Sox3(HMG)/NPC-Sox3-ChIP- Seq(GSE33059)/Homer | CCWTTGTY | 1.00E+00 | -4.85E-02 | 1 | 125 | 8.02% | 4351.6 | 9.20% |
| Tbox:Smad/ESCd5-Smad2_3-ChIP- Seq(GSE29422)/Homer | AGGTGHCAGACA | 1.00E+00 | -4.55E-02 | 1 | 10 | 0.64% | 483.6 | 1.02% |
| Sp1(Zf)/Promoter/Homer | GGCCCCGCCCCC | 1.00E+00 | -4.19E-02 | 1 | 5 | 0.32% | 287.4 | 0.61% |
| Srebp1a(HLH)/HepG2-Srebp1a-ChIP- Seq(GSE31477)/Homer | RTCACSCCAY | 1.00E+00 | -4.05E-02 | 1 | 14 | 0.90% | 642.3 | 1.36% |
| ETS:E-box/HPC7-Scl-ChIP- Seq(GSE22178)/Homer | AGGAARCAGCTG | 1.00E+00 | -3.43E-02 | 1 | 3 | 0.19% | 207 | 0.44% |
| Mouse_Recombination_Hotspot/Testis-DMC1- ChIP-Seq(GSE24438)/Homer | ACTYKNATTCGTGNTACTTC | 1.00E+00 | -2.70E-02 | 1 | 1 | 0.06% | 110.3 | 0.23% |
| HNF6(Homeobox)/Liver-Hnf6-ChIP- Seq(ERP000394)/Homer | NTATYGATCH | 1.00E+00 | -2.63E-02 | 1 | 20 | 1.28% | 895.3 | 1.89% |
| E2F7(E2F)/Hela-E2F7-ChIP- Seq(GSE32673)/Homer | VDTTTCCCGCCA | 1.00E+00 | -2.61E-02 | 1 | 1 | 0.06% | 112 | 0.24% |
| Pax7(Paired/Homeobox)/Myoblast-Pax7-ChIP- Seq(GSE25064)/Homer | TAATCAATTA | 1.00E+00 | -1.53E-02 | 1 | 1 | 0.06% | 127.8 | 0.27% |
| MafF(bZIP)/HepG2-MafF-ChIP- Seq(GSE31477)/Homer | HWWGTCAGCAWWTTT | 1.00E+00 | -1.06E-02 | 1 | 12 | 0.77% | 647.2 | 1.37% |
| Phox2a(Homeobox)/Neuron-Phox2a-ChIP- Seq(GSE31456)/Homer | YTAATYNRATTA | 1.00E+00 | -6.67E-03 | 1 | 11 | 0.71% | 632.7 | 1.34% |
| Srebp2(HLH)/HepG2-Srebp2-ChIP- Seq(GSE31477)/Homer | CGGTCACSCCAC | 1.00E+00 | -3.28E-03 | 1 | 6 | 0.39% | 447.7 | 0.95% |
| Eomes(T-box)/H9-Eomes-ChIP- Seq(GSE26097)/Homer | ATTAACACCT | 1.00E+00 | -3.16E-03 | 1 | 144 | 9.24% | 5369.6 | 11.35% |
| Ptf1a(HLH)/Panc1-Ptf1a-ChIP- Seq(GSE47459)/Homer | ACAGCTGTTN | 1.00E+00 | -2.76E-03 | 1 | 241 | 15.47% | 8560.6 | 18.10% |
| Nkx3.1(Homeobox)/LNCaP-Nkx3.1-ChIP- Seq(GSE28264)/Homer | AAGCACTTAA | 1.00E+00 | -2.40E-03 | 1 | 181 | 11.62% | 6627.1 | 14.01% |
| Isl1(Homeobox)/Neuron-Isl1-ChIP- Seq(GSE31456)/Homer | CTAATKGV | 1.00E+00 | -1.08E-03 | 1 | 114 | 7.32% | 4487.8 | 9.49% |
| Nanog(Homeobox)/mES-Nanog-ChIP- Seq(GSE11724)/Homer | RGCCATTAAC | 1.00E+00 | -7.78E-04 | 1 | 324 | 20.80% | 11420.9 | 24.14% |
| Nkx2.5(Homeobox)/HL1-Nkx2.5.biotin-ChIP- Seq(GSE21529)/Homer | RRSCACTYAA | 1.00E+00 | -7.70E-04 | 1 | 171 | 10.98% | 6444.2 | 13.62% |
| NFY(CCAAT)/Promoter/Homer | RGCCAATSRG | 1.00E+00 | -5.90E-04 | 1 | 30 | 1.93% | 1537.6 | 3.25% |
| Nkx2.1(Homeobox)/LungAC-Nkx2.1-ChIP- Seq(GSE43252)/Homer | RSCACTYRAG | 1.00E+00 | -2.73E-04 | 1 | 223 | 14.31% | 8293.5 | 17.53% |
| E2A(HLH)/proBcell-E2A-ChIP- Seq(GSE21978)/Homer | DNRCAGCTGY | 1.00E+00 | -1.60E-05 | 1 | 113 | 7.25% | 4860.2 | 10.27% |
| Tbx5(T-box)/HL1-Tbx5.biotin-ChIP- Seq(GSE21529)/Homer | AGGTGTCA | 1.00E+00 | -1.00E-06 | 1 | 263 | 16.88% | 10284 | 21.74% |
| E2A-nearPU.1(HLH)/Bcell-PU.1-ChIP- Seq(GSE21512)/Homer | NVCACCTGBN | 1.00E+00 | 0.00E+00 | 1 | 77 | 4.94% | 4697.9 | 9.93% |
| GFX(?)/Promoter/Homer | ATTCTCGCGAGA | 1.00E+00 | 0.00E+00 | 1 | 0 | 0.00% | 8.4 | 0.02% |
| Pax7-longest(Paired/Homeobox)/Myoblast- Pax7-ChIP-Seq(GSE25064)/Homer | NTAATTDGCYAATTANNWWD | 1.00E+00 | 0.00E+00 | 1 | 0 | 0.00% | 37.2 | 0.08% |
| REST-NRSF(Zf)/Jurkat-NRSF-ChIP- Seq/Homer | GGMGCTGTCCATGGTGCTG A | 1.00E+00 | 0.00E+00 | 1 | 0 | 0.00% | 27.3 | 0.06% |
| Pax7-long(Paired/Homeobox)/Myoblast-Pax7- ChIP-Seq(GSE25064)/Homer | TAATCHGATTAC | 1.00E+00 | 0.00E+00 | 1 | 0 | 0.00% | 40.3 | 0.09% |
| ZBTB33(Zf)/GM12878-ZBTB33-ChIP- Seq(GSE32465)/Homer | GGVTCTCGCGAGAAC | 1.00E+00 | 0.00E+00 | 1 | 0 | 0.00% | 24.5 | 0.05% |
| CTCF-SatelliteElement/CD4+-CTCF-ChIP- Seq(Barski et al.)/Homer | TGCAGTTCCMVNWRTGGCC A | 1.00E+00 | 0.00E+00 | 1 | 0 | 0.00% | 30.3 | 0.06% |
| E2F(E2F)/Cell-Cycle-Exp/Homer | TTSGCGCGAAAA | 1.00E+00 | 0.00E+00 | 1 | 0 | 0.00% | 43.4 | 0.09% |
