# Supplementary material for: TP53 engagement with the genome occurs in distinct local chromatin environments via pioneer factor activity
Source: HighWire-hosted journal article supplement (doi:10.1101/gr.181883.114), 2014-11-12
Supplement: Table_S9.docx [file Table_S9.docx]

**Table S9: Complete Motif Analysis for p53 Distal/Protoenhancers**

| **Motif Name** | **Consensus** | **P-value** | **Log P-value** | **q-value (Benjamini)** | **# of Target Sequences with Motif(of 1942)** | **% of Target Sequences with Motif** | **# of Background Sequences with Motif(of 46193)** | **% of Background Sequences with Motif** |
| --- | --- | --- | --- | --- | --- | --- | --- | --- |
| p53(p53)/Saos-p53-ChIP-Seq/Homer | RRCATGYCYRGRCATGYYYN | 1e-1259 | -2.90E+03 | 0 | 815 | 41.97% | 263.3 | 0.57% |
| p53(p53)/Saos-p53-ChIP- Seq(GSE15780)/Homer | RRCATGYCYRGRCATGYYYN | 1e-1259 | -2.90E+03 | 0 | 815 | 41.97% | 263.3 | 0.57% |
| p63(p53)/Keratinocyte-p63-ChIP- Seq(GSE17611)/Homer | NNDRCATGYCYNRRCATGYH | 1e-850 | -1.96E+03 | 0 | 814 | 41.92% | 847.8 | 1.84% |
| p53(p53)/mES-cMyc-ChIP- Seq(GSE11431)/Homer | ACATGCCCGGGCAT | 1e-395 | -9.11E+02 | 0 | 247 | 12.72% | 59.8 | 0.13% |
| Tcfcp2l1(CP2)/mES-Tcfcp2l1-ChIP- Seq(GSE11431)/Homer | NRAACCRGTTYRAACCRGYT | 1.00E-50 | -1.17E+02 | 0 | 75 | 3.86% | 160.5 | 0.35% |
| Smad2(MAD)/ES-SMAD2-ChIP- Seq(GSE29422)/Homer | CTGTCTGG | 1.00E-37 | -8.70E+01 | 0 | 307 | 15.81% | 3289 | 7.14% |
| Smad3(MAD)/NPC-Smad3-ChIP- Seq(GSE36673)/Homer | TWGTCTGV | 1.00E-33 | -7.66E+01 | 0 | 500 | 25.75% | 6961 | 15.11% |
| TEAD4(TEA)/Tropoblast-Tead4-ChIP- Seq(GSE37350)/Homer | CCWGGAATGY | 1.00E-30 | -7.07E+01 | 0 | 213 | 10.97% | 2087.5 | 4.53% |
| STAT6/Macrophage-Stat6-ChIP- Seq(GSE38377)/Homer | TTCCKNAGAA | 1.00E-30 | -7.05E+01 | 0 | 148 | 7.62% | 1159.4 | 2.52% |
| Smad4(MAD)/ESC-SMAD4-ChIP- Seq(GSE29422)/Homer | VBSYGTCTGG | 1.00E-30 | -7.05E+01 | 0 | 289 | 14.88% | 3308.9 | 7.18% |
| STAT5(Stat)/mCD4+-Stat5-ChIP- Seq(GSE12346)/Homer | RTTTCTNAGAAA | 1.00E-26 | -6.17E+01 | 0 | 105 | 5.41% | 705.8 | 1.53% |
| CHR/Cell-Cycle-Exp/Homer | SRGTTTCAAA | 1.00E-21 | -5.03E+01 | 0 | 154 | 7.93% | 1519.7 | 3.30% |
| Foxa2(Forkhead)/Liver-Foxa2-ChIP- Seq(GSE25694)/Homer | CYTGTTTACWYW | 1.00E-14 | -3.31E+01 | 0 | 162 | 8.34% | 1985.5 | 4.31% |
| BMAL1(HLH)/Liver-Bmal1-ChIP- Seq(GSE39860)/Homer | GNCACGTG | 1.00E-12 | -2.98E+01 | 0 | 324 | 16.68% | 5116.1 | 11.10% |
| Gata1(Zf)/K562-GATA1-ChIP- Seq(GSE18829)/Homer | SAGATAAGRV | 1.00E-11 | -2.54E+01 | 0 | 104 | 5.36% | 1189.6 | 2.58% |
| STAT4(Stat)/CD4-Stat4-ChIP- Seq(GSE22104)/Homer | NYTTCCWGGAAR | 1.00E-09 | -2.14E+01 | 0 | 154 | 7.93% | 2167.5 | 4.70% |
| Fox:Ebox(Forkhead:HLH)/Panc1-Foxa2- ChIP-Seq(GSE47459)/Homer | NNNVCTGWGYAAACASN | 1.00E-08 | -2.04E+01 | 0 | 162 | 8.34% | 2351.8 | 5.10% |
| Gata2(Zf)/K562-GATA2-ChIP- Seq(GSE18829)/Homer | BBCTTATCTS | 1.00E-08 | -1.89E+01 | 0 | 105 | 5.41% | 1362.9 | 2.96% |
| TEAD(TEA)/Fibroblast-PU.1-ChIP- Seq(Unpublished)/Homer | YCWGGAATGY | 1.00E-08 | -1.88E+01 | 0 | 128 | 6.59% | 1775.5 | 3.85% |
| GATA-DR8(Zf)/iTreg-Gata3-ChIP- Seq(GSE20898)/Homer | AGATSTNDNNDSAGATAASN | 1.00E-07 | -1.69E+01 | 0 | 23 | 1.18% | 137 | 0.30% |
| NFAT(RHD)/Jurkat-NFATC1-ChIP- Seq(Jolma et al.)/Homer | ATTTTCCATT | 1.00E-07 | -1.67E+01 | 0 | 154 | 7.93% | 2334.3 | 5.07% |
| CArG(MADS)/PUER-Srf-ChIP-Seq(Sullivan et al.)/Homer | CCATATATGGNM | 1.00E-06 | -1.47E+01 | 0 | 60 | 3.09% | 700.3 | 1.52% |
| NPAS2(HLH)/Liver-NPAS2-ChIP- Seq(GSE39860)/Homer | KCCACGTGAC | 1.00E-05 | -1.25E+01 | 0 | 174 | 8.96% | 2911.1 | 6.32% |
| ELF5(ETS)/T47D-ELF5-ChIP- Seq(GSE30407)/Homer | ACVAGGAAGT | 1.00E-04 | -1.13E+01 | 0.0001 | 99 | 5.10% | 1498.7 | 3.25% |
| ZFX(Zf)/mES-Zfx-ChIP- Seq(GSE11431)/Homer | AGGCCTRG | 1.00E-04 | -1.09E+01 | 0.0002 | 156 | 8.03% | 2635.2 | 5.72% |
| TRa(NR)/C17.2-TRa-ChIP- Seq(GSE38347)/Homer | GGTCANYTGAGGWCA | 1.00E-04 | -1.08E+01 | 0.0002 | 74 | 3.81% | 1048.8 | 2.28% |
| Gata4(Zf)/Heart-Gata4-ChIP- Seq(GSE35151)/Homer | NBWGATAAGR | 1.00E-04 | -1.02E+01 | 0.0004 | 133 | 6.85% | 2210.9 | 4.80% |
| BMYB(HTH)/Hela-BMYB- ChIPSeq(GSE27030)/Homer | NHAACBGYYV | 1.00E-04 | -1.00E+01 | 0.0004 | 185 | 9.53% | 3276.7 | 7.11% |
| GATA:SCL/Ter119-SCL-ChIP- Seq(GSE18720)/Homer | CRGCTGBNGNSNNSAGATAA | 1.00E-04 | -9.83E+00 | 0.0005 | 20 | 1.03% | 169.8 | 0.37% |
| CLOCK(HLH)/Liver-Clock-ChIP- Seq(GSE39860)/Homer | GHCACGTG | 1.00E-03 | -8.45E+00 | 0.0018 | 69 | 3.55% | 1038.9 | 2.26% |
| CEBP:CEBP(bZIP)/MEF-Chop-ChIP- Seq(GSE35681)/Homer | NTNATGCAAYMNNHTGMAAY | 1.00E-03 | -8.25E+00 | 0.0021 | 37 | 1.91% | 464.1 | 1.01% |
| NRF1/Promoter/Homer | STGCGCATGCGC | 1.00E-03 | -8.01E+00 | 0.0025 | 17 | 0.88% | 151.7 | 0.33% |
| ZNF711(Zf)/SH-SY5Y-ZNF711-ChIP- Seq(GSE20673)/Homer | AGGCCTAG | 1.00E-03 | -7.40E+00 | 0.0046 | 199 | 10.25% | 3754.9 | 8.15% |
| Foxh1(Forkhead)/hESC-FOXH1-ChIP- Seq(GSE29422)/Homer | NNTGTGGATTSS | 1.00E-02 | -5.62E+00 | 0.0264 | 83 | 4.27% | 1447 | 3.14% |
| HOXD13(Homeobox)/Chicken-Hoxd13- ChIP-Seq(GSE38910)/Homer | NCYAATAAAA | 1.00E-02 | -5.60E+00 | 0.0264 | 157 | 8.08% | 3001.2 | 6.51% |
| EBF(EBF)/proBcell-EBF-ChIP- Seq(GSE21978)/Homer | DGTCCCYRGGGA | 1.00E-02 | -5.48E+00 | 0.0286 | 25 | 1.29% | 328.6 | 0.71% |
| NFkB-p65(RHD)/GM12787-p65-ChIP- Seq(GSE19485)/Homer | WGGGGATTTCCC | 1.00E-02 | -5.25E+00 | 0.0351 | 57 | 2.94% | 942.1 | 2.04% |
| Atf1(bZIP)/K562-ATF1-ChIP- Seq(GSE31477)/Homer | GATGACGTCA | 1.00E-02 | -4.92E+00 | 0.0472 | 87 | 4.48% | 1571.7 | 3.41% |
| Chop(bZIP)/MEF-Chop-ChIP- Seq(GSE35681)/Homer | ATTGCATCAT | 1.00E-02 | -4.88E+00 | 0.0478 | 37 | 1.91% | 568.5 | 1.23% |
| FOXP1(Forkhead)/H9-FOXP1-ChIP- Seq(GSE31006)/Homer | NYYTGTTTACHN | 1.00E-02 | -4.87E+00 | 0.0478 | 60 | 3.09% | 1021.8 | 2.22% |
| FOXA1(Forkhead)/LNCAP-FOXA1-ChIP- Seq(GSE27824)/Homer | WAAGTAAACA | 1.00E-02 | -4.61E+00 | 0.0598 | 176 | 9.06% | 3504.5 | 7.61% |
| STAT6(Stat)/CD4-Stat6-ChIP- Seq(GSE22104)/Homer | ABTTCYYRRGAA | 1.00E-01 | -4.38E+00 | 0.0731 | 65 | 3.35% | 1150.1 | 2.50% |
| BATF(bZIP)/Th17-BATF-ChIP- Seq(GSE39756)/Homer | DATGASTCAT | 1.00E-01 | -4.33E+00 | 0.0754 | 72 | 3.71% | 1298.1 | 2.82% |
| GATA3(Zf)/iTreg-Gata3-ChIP- Seq(GSE20898)/Homer | AGATAASR | 1.00E-01 | -4.26E+00 | 0.0787 | 184 | 9.47% | 3716.4 | 8.07% |
| STAT1(Stat)/HelaS3-STAT1-ChIP- Seq(GSE12782)/Homer | NATTTCCNGGAAAT | 1.00E-01 | -4.23E+00 | 0.08 | 37 | 1.91% | 595.1 | 1.29% |
| Atf4(bZIP)/MEF-Atf4-ChIP- Seq(GSE35681)/Homer | MTGATGCAAT | 1.00E-01 | -4.15E+00 | 0.0846 | 44 | 2.27% | 737.2 | 1.60% |
| GATA-DR4(Zf)/iTreg-Gata3-ChIP- Seq(GSE20898)/Homer | AGATGKDGAGATAAG | 1.00E-01 | -3.93E+00 | 0.1031 | 14 | 0.72% | 177 | 0.38% |
| ZNF143|STAF(Zf)/CUTLL-ZNF143-ChIP- Seq(GSE29600)/Homer | ATTTCCCAGVAKSCY | 1.00E-01 | -3.46E+00 | 0.1605 | 38 | 1.96% | 651.2 | 1.41% |
| E2F7(E2F)/Hela-E2F7-ChIP- Seq(GSE32673)/Homer | VDTTTCCCGCCA | 1.00E-01 | -3.34E+00 | 0.1784 | 8 | 0.41% | 88.1 | 0.19% |
| ERE(NR/IR3)/MCF7-ERa-ChIP- Seq(Unpublished)/Homer | VAGGTCACNSTGACC | 1.00E-01 | -3.21E+00 | 0.198 | 27 | 1.39% | 443.8 | 0.96% |
| EWS:ERG-fusion(ETS)/CADO_ES1- EWS:ERG-ChIP-Seq(SRA014231)/Homer | ATTTCCTGTN | 1.00E-01 | -3.19E+00 | 0.1994 | 89 | 4.58% | 1746.5 | 3.79% |
| GRHL2(CP2)/HBE-GRHL2-ChIP- Seq(GSE46194)/Homer | AAACYKGTTWDACMRGTTTB | 1.00E-01 | -2.97E+00 | 0.2438 | 44 | 2.27% | 803.4 | 1.74% |
| CTCF(Zf)/CD4+-CTCF-ChIP-Seq(Barski et al.)/Homer | AYAGTGCCMYCTRGTGGCCA | 1.00E-01 | -2.83E+00 | 0.2748 | 10 | 0.51% | 133.9 | 0.29% |
| KLF5(Zf)/LoVo-KLF5-ChIP- Seq(GSE49402)/Homer | DGGGYGKGGC | 1.00E-01 | -2.80E+00 | 0.2762 | 91 | 4.69% | 1826.2 | 3.96% |
| AP-1(bZIP)/ThioMac-PU.1-ChIP- Seq(GSE21512)/Homer | VTGACTCATC | 1.00E-01 | -2.80E+00 | 0.2762 | 76 | 3.91% | 1499.5 | 3.25% |
| CEBP:AP1(bZIP)/ThioMac-CEBPb-ChIP- Seq(GSE21512)/Homer | DRTGTTGCAA | 1.00E-01 | -2.73E+00 | 0.2871 | 105 | 5.41% | 2142.4 | 4.65% |
| NF-E2(bZIP)/K562-NFE2-ChIP- Seq(GSE31477)/Homer | GATGACTCAGCA | 1.00E-01 | -2.65E+00 | 0.3055 | 8 | 0.41% | 102 | 0.22% |
| c-Jun-CRE(bZIP)/K562-cJun-ChIP- Seq(GSE31477)/Homer | ATGACGTCATCY | 1.00E-01 | -2.46E+00 | 0.3627 | 35 | 1.80% | 647.1 | 1.40% |
| BORIS(Zf)/K562-CTCFL-ChIP- Seq(GSE32465)/Homer | CNNBRGCGCCCCCTGSTGGC | 1.00E-01 | -2.42E+00 | 0.3721 | 11 | 0.57% | 164 | 0.36% |
| Srebp2(HLH)/HepG2-Srebp2-ChIP- Seq(GSE31477)/Homer | CGGTCACSCCAC | 1.00E-01 | -2.38E+00 | 0.3787 | 19 | 0.98% | 321.6 | 0.70% |
| E2F1(E2F)/Hela-E2F1-ChIP- Seq(GSE22478)/Homer | CWGGCGGGAA | 1.00E+00 | -2.24E+00 | 0.428 | 12 | 0.62% | 188.1 | 0.41% |
| Ap4(HLH)/AML-Tfap4-ChIP- Seq(GSE45738)/Homer | NAHCAGCTGD | 1.00E+00 | -2.24E+00 | 0.428 | 110 | 5.66% | 2312.9 | 5.02% |
| EHF(ETS)/LoVo-EHF-ChIP- Seq(GSE49402)/Homer | AVCAGGAAGT | 1.00E+00 | -2.01E+00 | 0.5244 | 131 | 6.75% | 2818.9 | 6.12% |
| Srebp1a(HLH)/HepG2-Srebp1a-ChIP- Seq(GSE31477)/Homer | RTCACSCCAY | 1.00E+00 | -1.96E+00 | 0.5414 | 25 | 1.29% | 468.8 | 1.02% |
| NFkB-p65-Rel(RHD)/LPS- exp(GSE23622)/Homer | GGAAATTCCC | 1.00E+00 | -1.84E+00 | 0.6025 | 6 | 0.31% | 86.8 | 0.19% |
| FOXA1(Forkhead)/MCF7-FOXA1-ChIP- Seq(GSE26831)/Homer | WAAGTAAACA | 1.00E+00 | -1.75E+00 | 0.6456 | 130 | 6.69% | 2836.2 | 6.16% |
| Rfx2(HTH)/LoVo-RFX2-ChIP- Seq(GSE49402)/Homer | GTTGCCATGGCAACM | 1.00E+00 | -1.62E+00 | 0.7279 | 8 | 0.41% | 132.6 | 0.29% |
| Max(HLH)/K562-Max-ChIP- Seq(GSE31477)/Homer | RCCACGTGGYYN | 1.00E+00 | -1.50E+00 | 0.807 | 63 | 3.24% | 1350.8 | 2.93% |
| Hnf1(Homeobox)/Liver-Foxa2-Chip- Seq(GSE25694)/Homer | GGTTAAWCATTAA | 1.00E+00 | -1.49E+00 | 0.807 | 15 | 0.77% | 284 | 0.62% |
| EBNA1(EBV virus)/Raji-EBNA1-ChIP- Seq(GSE30709)/Homer | GGYAGCAYDTGCTDCCCNNN | 1.00E+00 | -1.44E+00 | 0.8348 | 2 | 0.10% | 23 | 0.05% |
| GATA-IR3(Zf)/iTreg-Gata3-ChIP- Seq(GSE20898)/Homer | NNNNNBAGATAWYATCTVHN | 1.00E+00 | -1.37E+00 | 0.8803 | 17 | 0.88% | 335.6 | 0.73% |
| Tcf4(HMG)/Hct116-Tcf4-ChIP- Seq(SRA012054)/Homer | ASATCAAAGGVA | 1.00E+00 | -1.36E+00 | 0.8803 | 49 | 2.52% | 1051.9 | 2.28% |
| Pax8(Paired/Homeobox)/Thyroid-Pax8- ChIP-Seq(GSE26938)/Homer | GTCATGCHTGRCTGS | 1.00E+00 | -1.33E+00 | 0.8888 | 33 | 1.70% | 693.3 | 1.50% |
| Pax7(Paired/Homeobox)/Myoblast-Pax7- ChIP-Seq(GSE25064)/Homer | TAATCAATTA | 1.00E+00 | -1.33E+00 | 0.8888 | 9 | 0.46% | 165.6 | 0.36% |
| Mef2c(MADS)/GM12878-Mef2c-ChIP- Seq(GSE32465)/Homer | DCYAAAAATAGM | 1.00E+00 | -1.33E+00 | 0.8888 | 78 | 4.02% | 1718 | 3.73% |
| Nrf2(bZIP)/Lymphoblast-Nrf2-ChIP- Seq(GSE37589)/Homer | HTGCTGAGTCAT | 1.00E+00 | -1.29E+00 | 0.8888 | 5 | 0.26% | 83.9 | 0.18% |
| n-Myc(HLH)/mES-nMyc-ChIP- Seq(GSE11431)/Homer | VRCCACGTGG | 1.00E+00 | -1.29E+00 | 0.8888 | 60 | 3.09% | 1311.7 | 2.85% |
| ISRE(IRF)/ThioMac-LPS- exp(GSE23622)/HOMER | AGTTTCASTTTC | 1.00E+00 | -1.24E+00 | 0.9177 | 7 | 0.36% | 127 | 0.28% |
| HNF6(Homeobox)/Liver-Hnf6-ChIP- Seq(ERP000394)/Homer | NTATYGATCH | 1.00E+00 | -1.18E+00 | 0.953 | 54 | 2.78% | 1188.9 | 2.58% |
| SPDEF(ETS)/VCaP-SPDEF-ChIP- Seq(SRA014231)/Homer | ASWTCCTGBT | 1.00E+00 | -1.18E+00 | 0.953 | 91 | 4.69% | 2041.9 | 4.43% |
| Egr2/Thymocytes-Egr2-ChIP- Seq(GSE34254)/Homer | NGCGTGGGCGGR | 1.00E+00 | -1.16E+00 | 0.953 | 6 | 0.31% | 109.6 | 0.24% |
| Mef2a(MADS)/HL1-Mef2a.biotin-ChIP- Seq(GSE21529/Homer | CYAAAAATAG | 1.00E+00 | -1.16E+00 | 0.953 | 73 | 3.76% | 1629.5 | 3.54% |
| NRF1(NRF)/MCF7-NRF1-ChIP- Seq(Unpublished)/Homer | CTGCGCATGCGC | 1.00E+00 | -1.11E+00 | 0.9788 | 2 | 0.10% | 28.6 | 0.06% |
| RFX(HTH)/K562-RFX3-ChIP- Seq(SRA012198)/Homer | CGGTTGCCATGGCAAC | 1.00E+00 | -1.09E+00 | 0.9816 | 6 | 0.31% | 112 | 0.24% |
| RUNX-AML(Runt)/CD4+-PolII-ChIP- Seq(Barski et al.)/Homer | GCTGTGGTTW | 1.00E+00 | -1.08E+00 | 0.9825 | 61 | 3.14% | 1365.2 | 2.96% |
| CEBP(bZIP)/CEBPb-ChIP- Seq(GSE21512)/Homer | ATTGCGCAAC | 1.00E+00 | -1.06E+00 | 0.9869 | 92 | 4.74% | 2087.5 | 4.53% |
| HIF2a(HLH)/785_O-HIF2a-ChIP- Seq(GSE34871)/Homer | GCACGTACCC | 1.00E+00 | -1.05E+00 | 0.9915 | 22 | 1.13% | 473.8 | 1.03% |
| ELF1(ETS)/Jurkat-ELF1-ChIP- Seq(SRA014231)/Homer | AVCCGGAAGT | 1.00E+00 | -9.86E-01 | 1 | 31 | 1.60% | 686.4 | 1.49% |
| HIF-1a(HLH)/MCF7-HIF1a-ChIP- Seq(GSE28352)/Homer | TACGTGCV | 1.00E+00 | -9.86E-01 | 1 | 17 | 0.88% | 365.5 | 0.79% |
| Atf3(bZIP)/GBM-ATF3-ChIP- Seq(GSE33912)/Homer | DATGASTCATHN | 1.00E+00 | -9.47E-01 | 1 | 55 | 2.83% | 1248.4 | 2.71% |
| JunD(bZIP)/K562-JunD-ChIP-Seq/Homer | ATGACGTCATCN | 1.00E+00 | -9.31E-01 | 1 | 6 | 0.31% | 120.7 | 0.26% |
| PAX5- shortForm(Paired/Homeobox)/GM12878- PAX5-ChIP-Seq(GSE32465)/Homer | GTCACGCTCSCTGM | 1.00E+00 | -9.30E-01 | 1 | 8 | 0.41% | 165.1 | 0.36% |
| c-Myc(HLH)/LNCAP-cMyc-ChIP- Seq(unpublished)/Homer | VCCACGTG | 1.00E+00 | -8.88E-01 | 1 | 23 | 1.18% | 514 | 1.12% |
| Isl1(Homeobox)/Neuron-Isl1-ChIP- Seq(GSE31456)/Homer | CTAATKGV | 1.00E+00 | -8.16E-01 | 1 | 215 | 11.07% | 5044.1 | 10.95% |
| IRF2(IRF)/Erythroblas-IRF2-ChIP- Seq(GSE36985)/Homer | GAAASYGAAASY | 1.00E+00 | -8.14E-01 | 1 | 10 | 0.51% | 219.2 | 0.48% |
| Sp1(Zf)/Promoter/Homer | GGCCCCGCCCCC | 1.00E+00 | -7.91E-01 | 1 | 6 | 0.31% | 128.4 | 0.28% |
| Bach2(bZIP)/OCILy7-Bach2-ChIP- Seq(GSE44420)/Homer | TGCTGAGTCA | 1.00E+00 | -7.57E-01 | 1 | 15 | 0.77% | 341.7 | 0.74% |
| Znf263(Zf)/K562-Znf263-ChIP- Seq(GSE31477)/Homer | CVGTSCTCCC | 1.00E+00 | -7.46E-01 | 1 | 144 | 7.42% | 3390.4 | 7.36% |
| E2F4(E2F)/K562-E2F4-ChIP- Seq(GSE31477)/Homer | GGCGGGAAAH | 1.00E+00 | -7.25E-01 | 1 | 16 | 0.82% | 368.3 | 0.80% |
| GFY(?)/Promoter/Homer | ACTACAATTCCC | 1.00E+00 | -6.90E-01 | 1 | 5 | 0.26% | 111.3 | 0.24% |
| Pax7-longest(Paired/Homeobox)/Myoblast- Pax7-ChIP-Seq(GSE25064)/Homer | NTAATTDGCYAATTANNWWD | 1.00E+00 | -6.61E-01 | 1 | 3 | 0.15% | 65.4 | 0.14% |
| X-box(HTH)/NPC-H3K4me1-ChIP- Seq(GSE16256)/Homer | GGTTGCCATGGCAA | 1.00E+00 | -6.44E-01 | 1 | 10 | 0.51% | 234.7 | 0.51% |
| ETS(ETS)/Promoter/Homer | AACCGGAAGT | 1.00E+00 | -6.38E-01 | 1 | 20 | 1.03% | 474.3 | 1.03% |
| RUNX1(Runt)/Jurkat-RUNX1-ChIP- Seq(GSE29180)/Homer | AAACCACARM | 1.00E+00 | -6.31E-01 | 1 | 93 | 4.79% | 2216.3 | 4.81% |
| Arnt:Ahr(bHLH)/MCF7-Arnt-ChIP-Seq(Lo et al.)/Homer | TBGCACGCAA | 1.00E+00 | -5.89E-01 | 1 | 48 | 2.47% | 1153.5 | 2.50% |
| Mouse_Recombination_Hotspot/Testis- DMC1-ChIP-Seq(GSE24438)/Homer | ACTYKNATTCGTGNTACTTC | 1.00E+00 | -5.82E-01 | 1 | 6 | 0.31% | 143.2 | 0.31% |
| Bcl6(Zf)/Liver-Bcl6-ChIP- Seq(GSE31578)/Homer | NNNCTTTCCAGGAAA | 1.00E+00 | -5.40E-01 | 1 | 122 | 6.28% | 2939.1 | 6.38% |
| LXRE(NR/DR4)/BLRP(RAW)-LXRb-ChIP- Seq(GSE21512)/Homer | RGGTTACTANAGGTCA | 1.00E+00 | -5.40E-01 | 1 | 12 | 0.62% | 294.7 | 0.64% |
| c-Myc/mES-cMyc-ChIP- Seq(GSE11431)/Homer | VVCCACGTGG | 1.00E+00 | -5.37E-01 | 1 | 42 | 2.16% | 1021.8 | 2.22% |
| Bach1(bZIP)/K562-Bach1-ChIP- Seq(GSE31477)/Homer | AWWNTGCTGAGTCAT | 1.00E+00 | -5.24E-01 | 1 | 4 | 0.21% | 98.3 | 0.21% |
| TCFL2(HMG)/K562-TCF7L2-ChIP- Seq(GSE29196)/Homer | ACWTCAAAGG | 1.00E+00 | -4.68E-01 | 1 | 5 | 0.26% | 128.3 | 0.28% |
| PAX3:FKHR-fusion(Paired/Homeobox)/Rh4- PAX3:FKHR-ChIP-Seq(GSE19063)/Homer | ACCRTGACTAATTNN | 1.00E+00 | -4.61E-01 | 1 | 18 | 0.93% | 453.6 | 0.98% |
| PU.1(ETS)/ThioMac-PU.1-ChIP- Seq(GSE21512)/Homer | AGAGGAAGTG | 1.00E+00 | -4.57E-01 | 1 | 40 | 2.06% | 992 | 2.15% |
| USF1(HLH)/GM12878-Usf1-ChIP- Seq(GSE32465)/Homer | SGTCACGTGR | 1.00E+00 | -4.44E-01 | 1 | 28 | 1.44% | 702.1 | 1.52% |
| ETS:RUNX/Jurkat-RUNX1-ChIP- Seq(GSE17954)/Homer | RCAGGATGTGGT | 1.00E+00 | -4.37E-01 | 1 | 5 | 0.26% | 131.6 | 0.29% |
| GATA-IR4(Zf)/iTreg-Gata3-ChIP- Seq(GSE20898)/Homer | NAGATWNBNATCTNN | 1.00E+00 | -4.27E-01 | 1 | 5 | 0.26% | 132.2 | 0.29% |
| HRE(HSF)/HepG2-HSF1-ChIP- Seq(GSE31477)/Homer | BSTTCTRGAABVTTCYAGAA | 1.00E+00 | -4.25E-01 | 1 | 8 | 0.41% | 209.7 | 0.46% |
| FOXA1:AR/LNCAP-AR-ChIP- Seq(GSE27824)/Homer | AGTAAACAAAAAAGAACAND | 1.00E+00 | -4.17E-01 | 1 | 8 | 0.41% | 210.8 | 0.46% |
| Reverb(NR/DR2)/BLRP(RAW)-Reverba- ChIP-Seq(GSE45914)/Homer | GTRGGTCASTGGGTCA | 1.00E+00 | -3.98E-01 | 1 | 9 | 0.46% | 238.5 | 0.52% |
| E2F(E2F)/Cell-Cycle-Exp/Homer | TTSGCGCGAAAA | 1.00E+00 | -3.86E-01 | 1 | 1 | 0.05% | 27.4 | 0.06% |
| E-box(HLH)/Promoter/Homer | SSGGTCACGTGA | 1.00E+00 | -3.76E-01 | 1 | 3 | 0.15% | 84.8 | 0.18% |
| Egr1(Zf)/K562-Egr1-ChIP- Seq(GSE32465)/Homer | TGCGTGGGYG | 1.00E+00 | -3.51E-01 | 1 | 27 | 1.39% | 700.8 | 1.52% |
| Elk1(ETS)/Hela-Elk1-ChIP- Seq(GSE31477)/Homer | HACTTCCGGY | 1.00E+00 | -3.39E-01 | 1 | 29 | 1.49% | 753.3 | 1.64% |
| Phox2a(Homeobox)/Neuron-Phox2a-ChIP- Seq(GSE31456)/Homer | YTAATYNRATTA | 1.00E+00 | -3.34E-01 | 1 | 34 | 1.75% | 879.5 | 1.91% |
| Foxo1(Forkhead)/RAW-Foxo1-ChIP- Seq(Fan et al.)/Homer | CTGTTTAC | 1.00E+00 | -3.24E-01 | 1 | 207 | 10.66% | 5095.5 | 11.06% |
| E2F6(E2F)/Hela-E2F6-ChIP- Seq(GSE31477)/Homer | GGCGGGAARN | 1.00E+00 | -3.13E-01 | 1 | 20 | 1.03% | 534 | 1.16% |
| ERG(ETS)/VCaP-ERG-ChIP- Seq(GSE14097)/Homer | ACAGGAAGTG | 1.00E+00 | -3.11E-01 | 1 | 140 | 7.21% | 3483.6 | 7.56% |
| Nur77(NR)/K562-NR4A1-ChIP- Seq(GSE31363)/Homer | TGACCTTTNCNT | 1.00E+00 | -3.08E-01 | 1 | 14 | 0.72% | 382.8 | 0.83% |
| RARg(NR)/ES-RARg-ChIP- Seq(GSE30538)/Homer | AGGTCAAGGTCA | 1.00E+00 | -3.07E-01 | 1 | 2 | 0.10% | 62.5 | 0.14% |
| Unknown(Homeobox)/Limb-p300-ChIP- Seq/Homer | SSCMATWAAA | 1.00E+00 | -2.99E-01 | 1 | 66 | 3.40% | 1683.1 | 3.65% |
| Elk4(ETS)/Hela-Elk4-ChIP- Seq(GSE31477)/Homer | NRYTTCCGGY | 1.00E+00 | -2.99E-01 | 1 | 29 | 1.49% | 765.9 | 1.66% |
| RUNX(Runt)/HPC7-Runx1-ChIP- Seq(GSE22178)/Homer | SAAACCACAG | 1.00E+00 | -2.96E-01 | 1 | 51 | 2.63% | 1314.2 | 2.85% |
| Six1(Homeobox)/Myoblast-Six1-ChIP- Chip(GSE20150)/Homer | GKVTCADRTTWC | 1.00E+00 | -2.86E-01 | 1 | 18 | 0.93% | 490.6 | 1.06% |
| Nkx3.1(Homeobox)/LNCaP-Nkx3.1-ChIP- Seq(GSE28264)/Homer | AAGCACTTAA | 1.00E+00 | -2.75E-01 | 1 | 249 | 12.82% | 6148 | 13.34% |
| Jun-AP1(bZIP)/K562-cJun-ChIP- Seq(GSE31477)/Homer | GATGASTCATCN | 1.00E+00 | -2.73E-01 | 1 | 14 | 0.72% | 390 | 0.85% |
| Gfi1b(Zf)/HPC7-Gfi1b-ChIP- Seq(GSE22178)/Homer | MAATCACTGC | 1.00E+00 | -2.70E-01 | 1 | 72 | 3.71% | 1845.3 | 4.01% |
| RBPJ:Ebox/Panc1-Rbpj1-ChIP- Seq(GSE47459)/Homer | GGGRAARRGRMCAGMTG | 1.00E+00 | -2.63E-01 | 1 | 21 | 1.08% | 573.6 | 1.25% |
| MafK(bZIP)/C2C12-MafK-ChIP- Seq(GSE36030)/Homer | GCTGASTCAGCA | 1.00E+00 | -2.53E-01 | 1 | 14 | 0.72% | 395.1 | 0.86% |
| MyoG(HLH)/C2C12-MyoG-ChIP- Seq(GSE36024)/Homer | AACAGCTG | 1.00E+00 | -2.36E-01 | 1 | 74 | 3.81% | 1913.9 | 4.15% |
| Rfx1(HTH)/NPC-H3K4me1-ChIP- Seq(GSE16256)/Homer | KGTTGCCATGGCAA | 1.00E+00 | -2.33E-01 | 1 | 13 | 0.67% | 374.3 | 0.81% |
| Oct4:Sox17/F9-Sox17-ChIP- Seq(GSE44553)/Homer | CCATTGTATGCAAAT | 1.00E+00 | -2.26E-01 | 1 | 10 | 0.51% | 296.4 | 0.64% |
| GABPA(ETS)/Jurkat-GABPa-ChIP- Seq(GSE17954)/Homer | RACCGGAAGT | 1.00E+00 | -2.25E-01 | 1 | 65 | 3.35% | 1696.6 | 3.68% |
| Lhx2(Homeobox)/HFSC-Lhx2-ChIP- Seq(GSE48068)/Homer | TAATTAGN | 1.00E+00 | -2.22E-01 | 1 | 103 | 5.30% | 2638.8 | 5.73% |
| CRE(bZIP)/Promoter/Homer | CSGTGACGTCAC | 1.00E+00 | -2.21E-01 | 1 | 8 | 0.41% | 243.1 | 0.53% |
| RXR(NR/DR1)/3T3L1-RXR-ChIP- Seq(GSE13511)/Homer | TAGGGCAAAGGTCA | 1.00E+00 | -2.16E-01 | 1 | 87 | 4.48% | 2247.3 | 4.88% |
| ETS:E-box/HPC7-Scl-ChIP- Seq(GSE22178)/Homer | AGGAARCAGCTG | 1.00E+00 | -2.01E-01 | 1 | 6 | 0.31% | 192.7 | 0.42% |
| Pax7-long(Paired/Homeobox)/Myoblast- Pax7-ChIP-Seq(GSE25064)/Homer | TAATCHGATTAC | 1.00E+00 | -1.95E-01 | 1 | 1 | 0.05% | 41.9 | 0.09% |
| PRDM1/BMI1(Zf)/Hela-PRDM1-ChIP- Seq(GSE31477)/Homer | ACTTTCACTTTC | 1.00E+00 | -1.88E-01 | 1 | 48 | 2.47% | 1291.4 | 2.80% |
| EBF1(EBF)/Near-E2A-ChIP- Seq(GSE21512)/Homer | GTCCCCWGGGGA | 1.00E+00 | -1.59E-01 | 1 | 67 | 3.45% | 1789 | 3.88% |
| Tcf3(HMG)/mES-Tcf3-ChIP- Seq(GSE11724)/Homer | ASWTCAAAGG | 1.00E+00 | -1.55E-01 | 1 | 16 | 0.82% | 480.2 | 1.04% |
| NFY(CCAAT)/Promoter/Homer | RGCCAATSRG | 1.00E+00 | -1.54E-01 | 1 | 58 | 2.99% | 1566.2 | 3.40% |
| TR4(NR/DR1)/Hela-TR4-ChIP- Seq(GSE24685)/Homer | GAGGTCAAAGGTCA | 1.00E+00 | -1.52E-01 | 1 | 5 | 0.26% | 175.6 | 0.38% |
| NFkB-p50,p52(RHD)/p50-ChIP- Chip(Schreiber et al.)/Homer | GGGGGAATCCCC | 1.00E+00 | -1.48E-01 | 1 | 4 | 0.21% | 146.4 | 0.32% |
| Myf5(bHLH)/GM-Myf5-ChIP- Seq(GSE24852)/Homer | BAACAGCTGT | 1.00E+00 | -1.40E-01 | 1 | 48 | 2.47% | 1322.6 | 2.87% |
| Nkx2.5(Homeobox)/HL1-Nkx2.5.biotin-ChIP- Seq(GSE21529)/Homer | RRSCACTYAA | 1.00E+00 | -1.39E-01 | 1 | 228 | 11.74% | 5787.1 | 12.56% |
| bHLHE40(HLH)/HepG2-BHLHE40-ChIP- Seq(GSE31477)/Homer | KCACGTGMCN | 1.00E+00 | -1.33E-01 | 1 | 16 | 0.82% | 490.6 | 1.06% |
| Sox3(HMG)/NPC-Sox3-ChIP- Seq(GSE33059)/Homer | CCWTTGTY | 1.00E+00 | -1.32E-01 | 1 | 203 | 10.45% | 5186 | 11.26% |
| NeuroD1(bHLH)/Islet-NeuroD1-ChIP- Seq(GSE30298)/Homer | GCCATCTGTT | 1.00E+00 | -1.31E-01 | 1 | 61 | 3.14% | 1660.7 | 3.60% |
| Ptf1a(HLH)/Panc1-Ptf1a-ChIP- Seq(GSE47459)/Homer | ACAGCTGTTN | 1.00E+00 | -1.31E-01 | 1 | 256 | 13.18% | 6483.3 | 14.07% |
| PRDM14(Zf)/H1-PRDM14-ChIP- Seq(GSE22767)/Homer | RGGTCTCTAACY | 1.00E+00 | -1.27E-01 | 1 | 17 | 0.88% | 520.8 | 1.13% |
| MyoD(HLH)/Myotube-MyoD-ChIP- Seq(GSE21614)/Homer | RRCAGCTGYTSY | 1.00E+00 | -1.26E-01 | 1 | 47 | 2.42% | 1307.7 | 2.84% |
| PRDM9(Zf)/Testis-DMC1-ChIP- Seq(GSE35498)/Homer | ADGGYAGYAGCATCT | 1.00E+00 | -1.21E-01 | 1 | 28 | 1.44% | 817.3 | 1.77% |
| ETV1(ETS)/GIST48-ETV1-ChIP- Seq(GSE22441)/Homer | AACCGGAAGT | 1.00E+00 | -1.17E-01 | 1 | 101 | 5.20% | 2682.5 | 5.82% |
| HOXA2(Homeobox)/mES-Hoxa2-ChIP- Seq(Donaldson et al.)/Homer | GYCATCMATCAT | 1.00E+00 | -1.15E-01 | 1 | 6 | 0.31% | 216.9 | 0.47% |
| Nr5a2(NR)/Pancreas-LRH1-ChIP- Seq(GSE34295)/Homer | BTCAAGGTCA | 1.00E+00 | -1.13E-01 | 1 | 48 | 2.47% | 1344 | 2.92% |
| RUNX2(Runt)/PCa-RUNX2-ChIP- Seq(GSE33889)/Homer | NWAACCACADNN | 1.00E+00 | -1.12E-01 | 1 | 59 | 3.04% | 1626.2 | 3.53% |
| Klf4(Zf)/mES-Klf4-ChIP- Seq(GSE11431)/Homer | GCCACACCCA | 1.00E+00 | -1.04E-01 | 1 | 18 | 0.93% | 560.2 | 1.22% |
| GFY-Staf/Promoters/Homer | RACTACAATTCCCAGAAKGC | 1.00E+00 | -1.04E-01 | 1 | 1 | 0.05% | 55.5 | 0.12% |
| EKLF(Zf)/Erythrocyte-Klf1-ChIP- Seq(GSE20478)/Homer | NWGGGTGTGGCY | 1.00E+00 | -9.46E-02 | 1 | 10 | 0.51% | 342.7 | 0.74% |
| IRF1(IRF)/PBMC-IRF1-ChIP- Seq(GSE43036)/Homer | GAAAGTGAAAGT | 1.00E+00 | -9.29E-02 | 1 | 9 | 0.46% | 314.4 | 0.68% |
| PAX5(Paired/Homeobox)/GM12878-PAX5- ChIP-Seq(GSE32465)/Homer | GCAGCCAAGCRTGACH | 1.00E+00 | -9.15E-02 | 1 | 26 | 1.34% | 785.9 | 1.71% |
| VDR(NR/DR3)/GM10855-VDR+vitD-ChIP- Seq(GSE22484)/Homer | ARAGGTCANWGAGTTCANNN | 1.00E+00 | -9.04E-02 | 1 | 8 | 0.41% | 286.1 | 0.62% |
| Tbet(T-box)/CD8-Tbet-ChIP- Seq(GSE33802)/Homer | AGGTGTGAAM | 1.00E+00 | -9.01E-02 | 1 | 100 | 5.15% | 2692.2 | 5.84% |
| Stat3(Stat)/mES-Stat3-ChIP- Seq(GSE11431)/Homer | CTTCCGGGAA | 1.00E+00 | -8.40E-02 | 1 | 28 | 1.44% | 845.6 | 1.84% |
| NF1:FOXA1/LNCAP-FOXA1-ChIP- Seq(GSE27824)/Homer | WNTGTTTRYTTTGGCA | 1.00E+00 | -8.26E-02 | 1 | 3 | 0.15% | 134.7 | 0.29% |
| Nkx2.1(Homeobox)/LungAC-Nkx2.1-ChIP- Seq(GSE43252)/Homer | RSCACTYRAG | 1.00E+00 | -7.67E-02 | 1 | 294 | 15.14% | 7519.1 | 16.32% |
| OCT4-SOX2-TCF- NANOG((POU/Homeobox/HMG)/mES- Oct4-ChIP-Seq(GSE11431)/Homer | ATTTGCATAACAATG | 1.00E+00 | -7.34E-02 | 1 | 15 | 0.77% | 498.1 | 1.08% |
| Maz(Zf)/HepG2-Maz-ChIP- Seq(GSE31477)/Homer | GGGGGGGG | 1.00E+00 | -6.69E-02 | 1 | 55 | 2.83% | 1576.8 | 3.42% |
| ETS1(ETS)/Jurkat-ETS1-ChIP- Seq(GSE17954)/Homer | ACAGGAAGTG | 1.00E+00 | -6.10E-02 | 1 | 74 | 3.81% | 2077.7 | 4.51% |
| Sox2(HMG)/mES-Sox2-ChIP- Seq(GSE11431)/Homer | BCCATTGTTC | 1.00E+00 | -5.45E-02 | 1 | 85 | 4.38% | 2372.2 | 5.15% |
| YY1(Zf)/Promoter/Homer | CAAGATGGCGGC | 1.00E+00 | -5.21E-02 | 1 | 2 | 0.10% | 112.7 | 0.24% |
| Tcf12(HLH)/GM12878-Tcf12-ChIP- Seq(GSE32465)/Homer | VCAGCTGYTG | 1.00E+00 | -4.93E-02 | 1 | 61 | 3.14% | 1762.3 | 3.83% |
| Lhx3(Homeobox)/Neuron-Lhx3-ChIP- Seq(GSE31456)/Homer | ADBTAATTAR | 1.00E+00 | -4.82E-02 | 1 | 158 | 8.14% | 4236.5 | 9.20% |
| AR-halfsite(NR)/LNCaP-AR-ChIP- Seq(GSE27824)/Homer | CCAGGAACAG | 1.00E+00 | -4.81E-02 | 1 | 394 | 20.29% | 10054.1 | 21.82% |
| HNF4a(NR/DR1)/HepG2-HNF4a-ChIP- Seq(GSE25021)/Homer | CARRGKBCAAAGTYCA | 1.00E+00 | -4.48E-02 | 1 | 27 | 1.39% | 864 | 1.88% |
| NF1-halfsite(CTF)/LNCaP-NF1-ChIP- Seq(Unpublished)/Homer | YTGCCAAG | 1.00E+00 | -4.38E-02 | 1 | 160 | 8.24% | 4300.5 | 9.33% |
| HOXA9(Homeobox)/HSC-Hoxa9-ChIP- Seq(GSE33509)/Homer | GGCCATAAATCA | 1.00E+00 | -3.95E-02 | 1 | 57 | 2.94% | 1678.4 | 3.64% |
| Usf2(HLH)/C2C12-Usf2-ChIP- Seq(GSE36030)/Homer | GTCACGTGGT | 1.00E+00 | -3.94E-02 | 1 | 18 | 0.93% | 619.7 | 1.35% |
| Hoxb4(Homeobox)/ES-Hoxb4-ChIP- Seq(GSE34014)/Homer | TGATTRATGGCY | 1.00E+00 | -3.80E-02 | 1 | 10 | 0.51% | 386.6 | 0.84% |
| GLI3(Zf)/GLI3-ChIP- Chip(GSE11077)/Homer | CGTGGGTGGTCC | 1.00E+00 | -3.63E-02 | 1 | 3 | 0.15% | 160.1 | 0.35% |
| Cdx2(Homeobox)/mES-Cdx2-ChIP- Seq(GSE14586)/Homer | GYMATAAAAH | 1.00E+00 | -3.37E-02 | 1 | 64 | 3.30% | 1877.9 | 4.08% |
| Rbpj1(?)/Panc1-Rbpj1-ChIP- Seq(GSE47459)/Homer | HTTTCCCASG | 1.00E+00 | -2.87E-02 | 1 | 117 | 6.02% | 3267 | 7.09% |
| TATA-Box(TBP)/Promoter/Homer | CCTTTTAWAGSC | 1.00E+00 | -2.69E-02 | 1 | 111 | 5.72% | 3120.6 | 6.77% |
| Hoxc9(Homeobox)/Ainv15-Hoxc9-ChIP- Seq(GSE21812)/Homer | GGCCATAAATCA | 1.00E+00 | -2.22E-02 | 1 | 38 | 1.96% | 1215.8 | 2.64% |
| PPARE(NR/DR1)/3T3L1-Pparg-ChIP- Seq(GSE13511)/Homer | TGACCTTTGCCCCA | 1.00E+00 | -2.19E-02 | 1 | 63 | 3.24% | 1890.4 | 4.10% |
| IRF4(IRF)/GM12878-IRF4-ChIP- Seq(GSE32465)/Homer | ACTGAAACCA | 1.00E+00 | -2.08E-02 | 1 | 30 | 1.54% | 998.7 | 2.17% |
| Stat3+il21(Stat)/CD4-Stat3-ChIP- Seq(GSE19198)/Homer | SVYTTCCNGGAARB | 1.00E+00 | -2.07E-02 | 1 | 42 | 2.16% | 1330.5 | 2.89% |
| HRE(HSF)/Striatum-HSF1-ChIP- Seq(GSE38000)/Homer | TTCTAGAABNTTCTA | 1.00E+00 | -2.04E-02 | 1 | 10 | 0.51% | 414.9 | 0.90% |
| bZIP:IRF/Th17-BatF-ChIP- Seq(GSE39756)/Homer | NAGTTTCABTHTGACTNW | 1.00E+00 | -1.98E-02 | 1 | 29 | 1.49% | 973.3 | 2.11% |
| Oct2(POU/Homeobox)/Bcell-Oct2-ChIP- Seq(GSE21512)/Homer | ATATGCAAAT | 1.00E+00 | -1.95E-02 | 1 | 30 | 1.54% | 1002.6 | 2.18% |
| Tbx20(T-box)/Heart-Tbx20-ChIP- Seq(GSE29636)/Homer | GGTGYTGACAGS | 1.00E+00 | -1.91E-02 | 1 | 10 | 0.51% | 417.7 | 0.91% |
| Pbx3(Homeobox)/GM12878-PBX3-ChIP- Seq(GSE32465)/Homer | SCTGTCAMTCAN | 1.00E+00 | -1.48E-02 | 1 | 9 | 0.46% | 396.1 | 0.86% |
| Atoh1(bHLH)/Cerebellum-Atoh1-ChIP- Seq(GSE22111)/Homer | VNRVCAGCTGGY | 1.00E+00 | -1.43E-02 | 1 | 77 | 3.96% | 2300.9 | 4.99% |
| GRE(NR/IR3)/A549-GR-ChIP- Seq(GSE32465)/Homer | NRGVACABNVTGTYCY | 1.00E+00 | -1.34E-02 | 1 | 5 | 0.26% | 265.4 | 0.58% |
| NFAT:AP1/Jurkat-NFATC1-ChIP-Seq(Jolma et al.)/Homer | SARTGGAAAAWRTGAGTCAB | 1.00E+00 | -1.31E-02 | 1 | 9 | 0.46% | 401.5 | 0.87% |
| Ets1-distal(ETS)/CD4+-PolII-ChIP- Seq(Barski et al.)/Homer | MACAGGAAGT | 1.00E+00 | -1.27E-02 | 1 | 17 | 0.88% | 651.7 | 1.41% |
| E2A-nearPU.1(HLH)/Bcell-PU.1-ChIP- Seq(GSE21512)/Homer | NVCACCTGBN | 1.00E+00 | -1.26E-02 | 1 | 117 | 6.02% | 3359.9 | 7.29% |
| Unknown-ESC-element/mES-Nanog-ChIP- Seq(GSE11724)/Homer | CACAGCAGGGGG | 1.00E+00 | -1.22E-02 | 1 | 30 | 1.54% | 1032.5 | 2.24% |
| Nr5a2(NR)/mES-Nr5a2-ChIP- Seq(GSE19019)/Homer | BTCAAGGTCA | 1.00E+00 | -1.17E-02 | 1 | 30 | 1.54% | 1035.1 | 2.25% |
| Rfx5(HTH)/GM12878-Rfx5-ChIP- Seq(GSE31477)/Homer | SCCTAGCAACAG | 1.00E+00 | -1.13E-02 | 1 | 19 | 0.98% | 717.7 | 1.56% |
| Esrrb(NR)/mES-Esrrb-ChIP- Seq(GSE11431)/Homer | KTGACCTTGA | 1.00E+00 | -1.01E-02 | 1 | 38 | 1.96% | 1270.8 | 2.76% |
| GRE/RAW264.7-GRE-ChIP- Seq(Unpublished)/Homer | VAGRACAKWCTGTYC | 1.00E+00 | -8.81E-03 | 1 | 10 | 0.51% | 450.2 | 0.98% |
| AMYB(HTH)/Testes-AMYB-ChIP- Seq(GSE44588)/Homer | TGGCAGTTGG | 1.00E+00 | -6.54E-03 | 1 | 118 | 6.08% | 3453.1 | 7.50% |
| Erra(NR)/HepG2-Erra-ChIP- Seq(GSE31477)/Homer | CAAAGGTCAG | 1.00E+00 | -5.22E-03 | 1 | 173 | 8.91% | 4900.6 | 10.64% |
| Tbox:Smad/ESCd5-Smad2_3-ChIP- Seq(GSE29422)/Homer | AGGTGHCAGACA | 1.00E+00 | -4.68E-03 | 1 | 8 | 0.41% | 408.2 | 0.89% |
| Fli1(ETS)/CD8-FLI-ChIP- Seq(GSE20898)/Homer | NRYTTCCGGH | 1.00E+00 | -2.65E-03 | 1 | 65 | 3.35% | 2115.2 | 4.59% |
| Pitx1(Homeobox)/Chicken-Pitx1-ChIP- Seq(GSE38910)/Homer | TAATCCCN | 1.00E+00 | -2.47E-03 | 1 | 503 | 25.90% | 13239.3 | 28.74% |
| Pdx1(Homeobox)/Islet-Pdx1-ChIP- Seq(SRA008281)/Homer | YCATYAATCA | 1.00E+00 | -2.36E-03 | 1 | 76 | 3.91% | 2425.4 | 5.26% |
| Sox6(HMG)/Myotubes-Sox6-ChIP- Seq(GSE32627)/Homer | CCATTGTTNY | 1.00E+00 | -2.29E-03 | 1 | 163 | 8.39% | 4732.5 | 10.27% |
| AP-2gamma(AP2)/MCF7-TFAP2C-ChIP- Seq(GSE21234)/Homer | SCCTSAGGSCAW | 1.00E+00 | -2.28E-03 | 1 | 52 | 2.68% | 1764.4 | 3.83% |
| MafA(bZIP)/Islet-MafA-ChIP- Seq(GSE30298)/Homer | TGCTGACTCA | 1.00E+00 | -2.20E-03 | 1 | 45 | 2.32% | 1568.8 | 3.41% |
| FXR(NR/IR1)/Liver-FXR-ChIP-Seq(Chong et al.)/Homer | AGGTCANTGACCTB | 1.00E+00 | -2.03E-03 | 1 | 15 | 0.77% | 675.3 | 1.47% |
| ARE(NR)/LNCAP-AR-ChIP- Seq(GSE27824)/Homer | RGRACASNSTGTYCYB | 1.00E+00 | -1.49E-03 | 1 | 8 | 0.41% | 450.9 | 0.98% |
| MYB(HTH)/ERMYB-Myb- ChIPSeq(GSE22095)/Homer | GGCVGTTR | 1.00E+00 | -1.38E-03 | 1 | 128 | 6.59% | 3865.2 | 8.39% |
| Olig2(bHLH)/Neuron-Olig2-ChIP- Seq(GSE30882)/Homer | RCCATMTGTT | 1.00E+00 | -1.06E-03 | 1 | 167 | 8.60% | 4915 | 10.67% |
| NF1(CTF)/LNCAP-NF1-ChIP- Seq(Unpublished)/Homer | CYTGGCABNSTGCCAR | 1.00E+00 | -7.94E-04 | 1 | 16 | 0.82% | 748.6 | 1.62% |
| Eomes(T-box)/H9-Eomes-ChIP- Seq(GSE26097)/Homer | ATTAACACCT | 1.00E+00 | -3.55E-04 | 1 | 184 | 9.47% | 5465 | 11.86% |
| Oct4(POU/Homeobox)/mES-Oct4-ChIP- Seq(GSE11431)/Homer | ATTTGCATAW | 1.00E+00 | -3.12E-04 | 1 | 38 | 1.96% | 1478.8 | 3.21% |
| AP-2alpha(AP2)/Hela-AP2alpha-ChIP- Seq(GSE31477)/Homer | ATGCCCTGAGGC | 1.00E+00 | -3.08E-04 | 1 | 32 | 1.65% | 1297.7 | 2.82% |
| EWS:FLI1-fusion(ETS)/SK_N_MC- EWS:FLI1-ChIP-Seq(SRA014231)/Homer | VACAGGAAAT | 1.00E+00 | -1.98E-04 | 1 | 26 | 1.34% | 1132.2 | 2.46% |
| E2A(HLH)/proBcell-E2A-ChIP- Seq(GSE21978)/Homer | DNRCAGCTGY | 1.00E+00 | -1.29E-04 | 1 | 106 | 5.46% | 3467.6 | 7.53% |
| CRX(Homeobox)/Retina-Crx-ChIP- Seq(GSE20012)/Homer | GCTAATCC | 1.00E+00 | -4.50E-05 | 1 | 243 | 12.51% | 7198.2 | 15.62% |
| PU.1-IRF(ETS:IRF)/Bcell-PU.1-ChIP- Seq(GSE21512)/Homer | MGGAAGTGAAAC | 1.00E+00 | -2.70E-05 | 1 | 94 | 4.84% | 3243.7 | 7.04% |
| Tlx?(NR)/NPC-H3K4me1-ChIP- Seq(GSE16256)/Homer | CTGGCAGSCTGCCA | 1.00E+00 | -1.90E-05 | 1 | 14 | 0.72% | 826 | 1.79% |
| MafF(bZIP)/HepG2-MafF-ChIP- Seq(GSE31477)/Homer | HWWGTCAGCAWWTTT | 1.00E+00 | -6.00E-06 | 1 | 12 | 0.62% | 793.1 | 1.72% |
| Tbx5(T-box)/HL1-Tbx5.biotin-ChIP- Seq(GSE21529)/Homer | AGGTGTCA | 1.00E+00 | -4.00E-06 | 1 | 293 | 15.09% | 8710.5 | 18.91% |
| SCL(HLH)/HPC7-Scl-ChIP- Seq(GSE13511)/Homer | AVCAGCTG | 1.00E+00 | -2.00E-06 | 1 | 396 | 20.39% | 11404.6 | 24.75% |
| Nkx6.1(Homeobox)/Islet-Nkx6.1-ChIP- Seq(GSE40975)/Homer | GKTAATGR | 1.00E+00 | -1.00E-06 | 1 | 240 | 12.36% | 7446.6 | 16.16% |
| PR(NR)/T47D-PR-ChIP- Seq(GSE31130)/Homer | VAGRACAKNCTGTBC | 1.00E+00 | 0.00E+00 | 1 | 160 | 8.24% | 5383.1 | 11.68% |
| Nanog(Homeobox)/mES-Nanog-ChIP- Seq(GSE11724)/Homer | RGCCATTAAC | 1.00E+00 | 0.00E+00 | 1 | 381 | 19.62% | 12123.3 | 26.31% |
| T1ISRE(IRF)/Ifnb-Exp/Homer | ACTTTCGTTTCT | 1.00E+00 | 0.00E+00 | 1 | 0 | 0.00% | 19.8 | 0.04% |
| PBX1(Homeobox)/MCF7-PBX1-ChIP- Seq(GSE28007)/Homer | GSCTGTCACTCA | 1.00E+00 | 0.00E+00 | 1 | 0 | 0.00% | 108.1 | 0.23% |
| GFX(?)/Promoter/Homer | ATTCTCGCGAGA | 1.00E+00 | 0.00E+00 | 1 | 0 | 0.00% | 6.9 | 0.01% |
| ZBTB33(Zf)/GM12878-ZBTB33-ChIP- Seq(GSE32465)/Homer | GGVTCTCGCGAGAAC | 1.00E+00 | 0.00E+00 | 1 | 0 | 0.00% | 15.2 | 0.03% |
| CTCF-SatelliteElement/CD4+-CTCF-ChIP- Seq(Barski et al.)/Homer | TGCAGTTCCMVNWRTGGCCA | 1.00E+00 | 0.00E+00 | 1 | 0 | 0.00% | 22 | 0.05% |
| REST-NRSF(Zf)/Jurkat-NRSF-ChIP- Seq/Homer | GGMGCTGTCCATGGTGCTGA | 1.00E+00 | 0.00E+00 | 1 | 0 | 0.00% | 0.9 | 0.00% |
