# Supplementary figures and images for: TP53 engagement with the genome occurs in distinct local chromatin environments via pioneer factor activity
Source: PubMed Central journal article supplement — Genome Res. 2015 Feb;25(2):179–88. doi: 10.1101/gr.181883.114 (PMC4315292; doi:10.1101/gr.181883.114), 2015-02

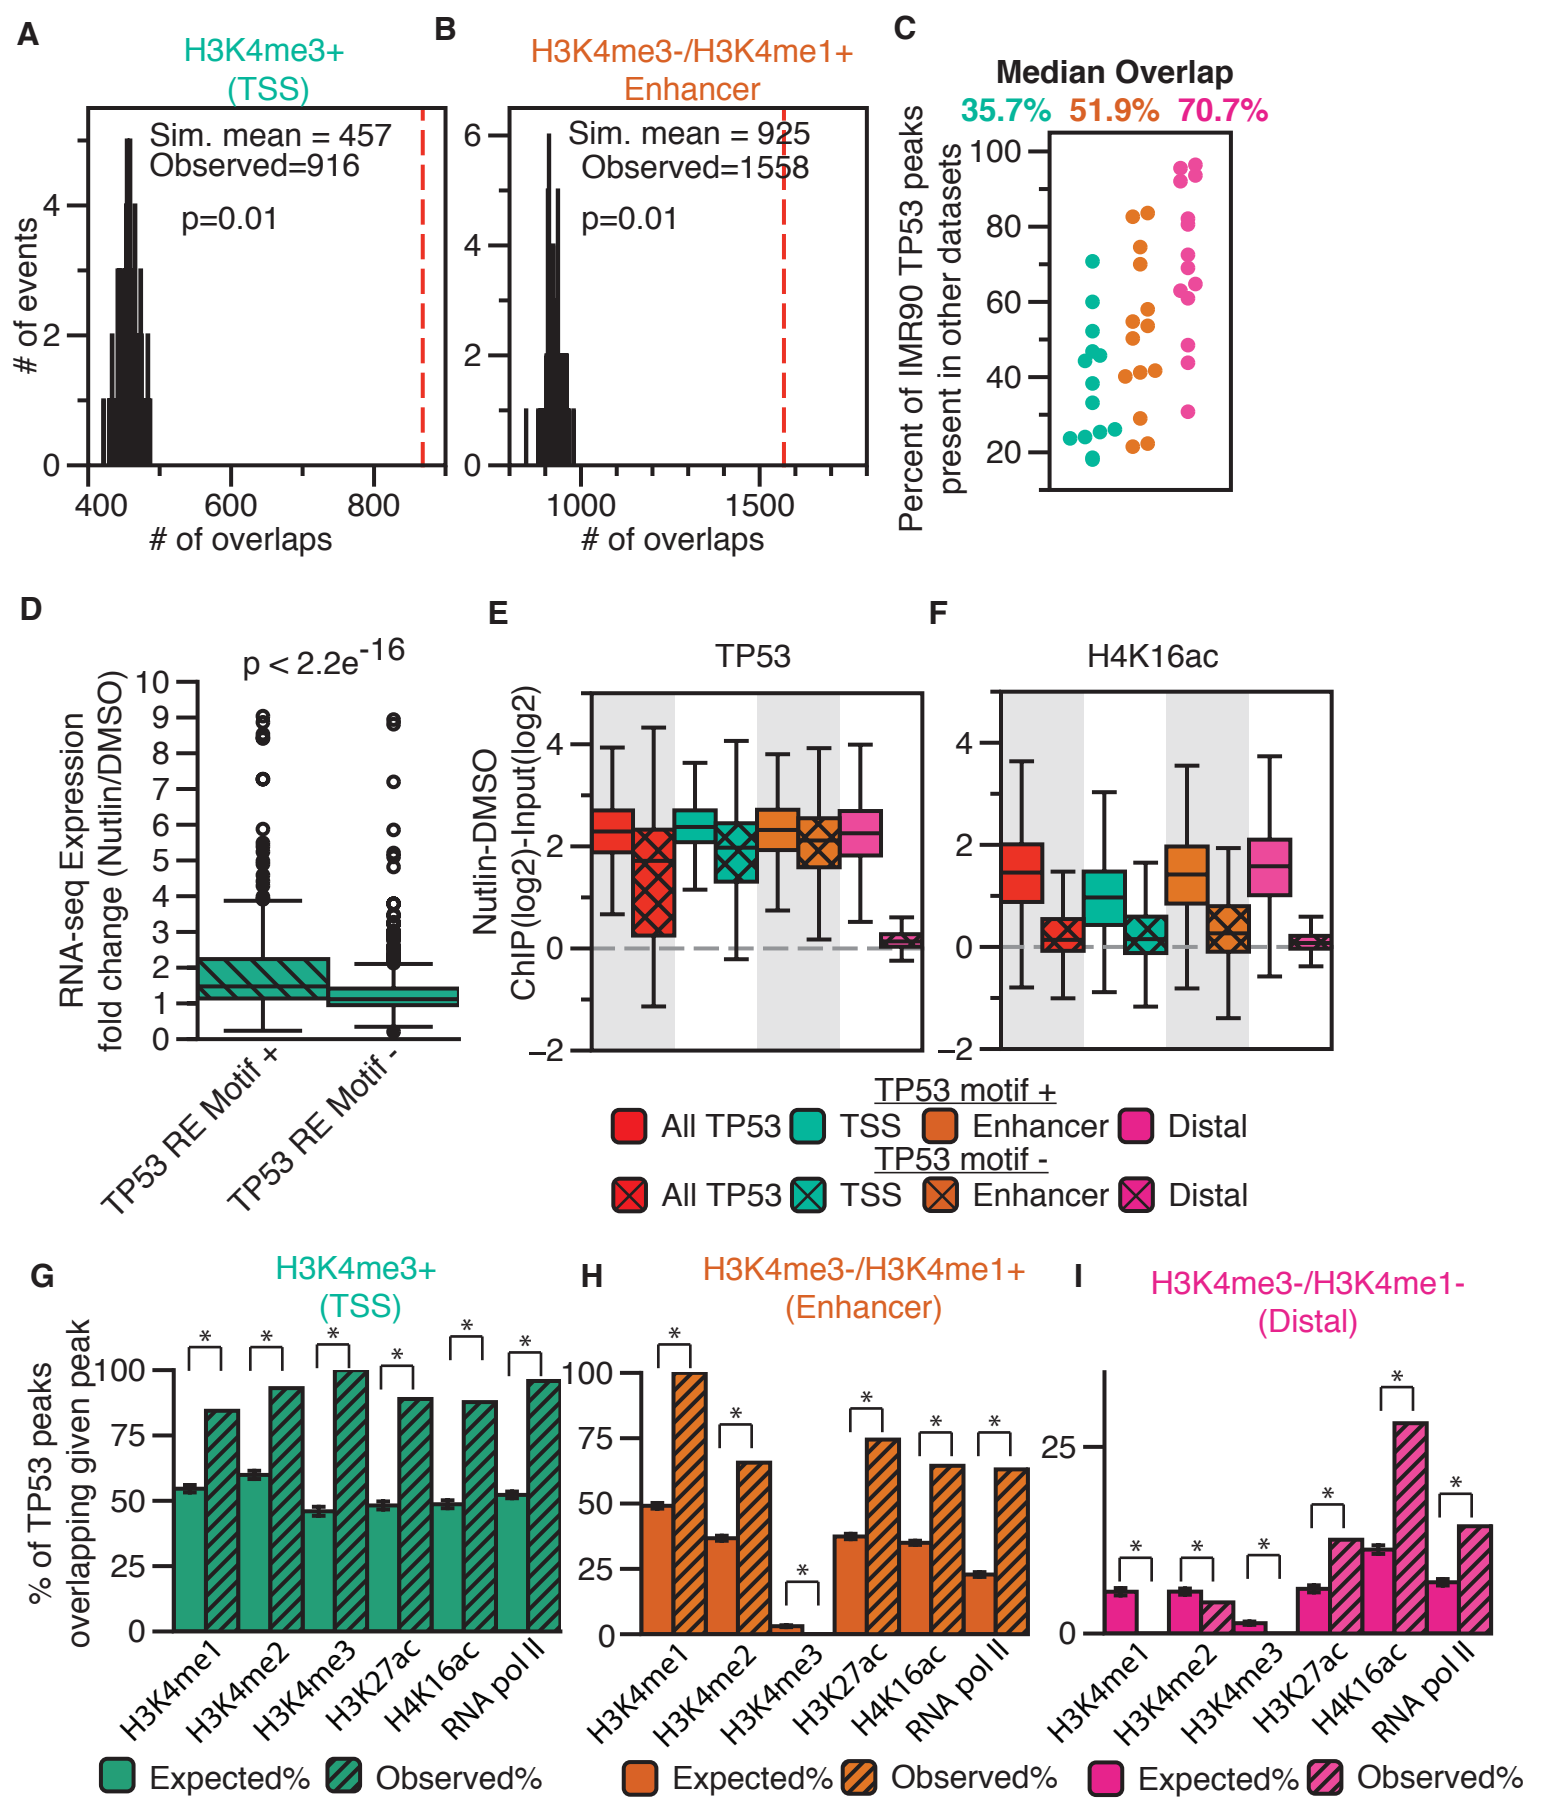

Supplement: supp_gr.181883.114_FigureS2.pdf [file supp_gr.181883.114_FigureS2.pdf]

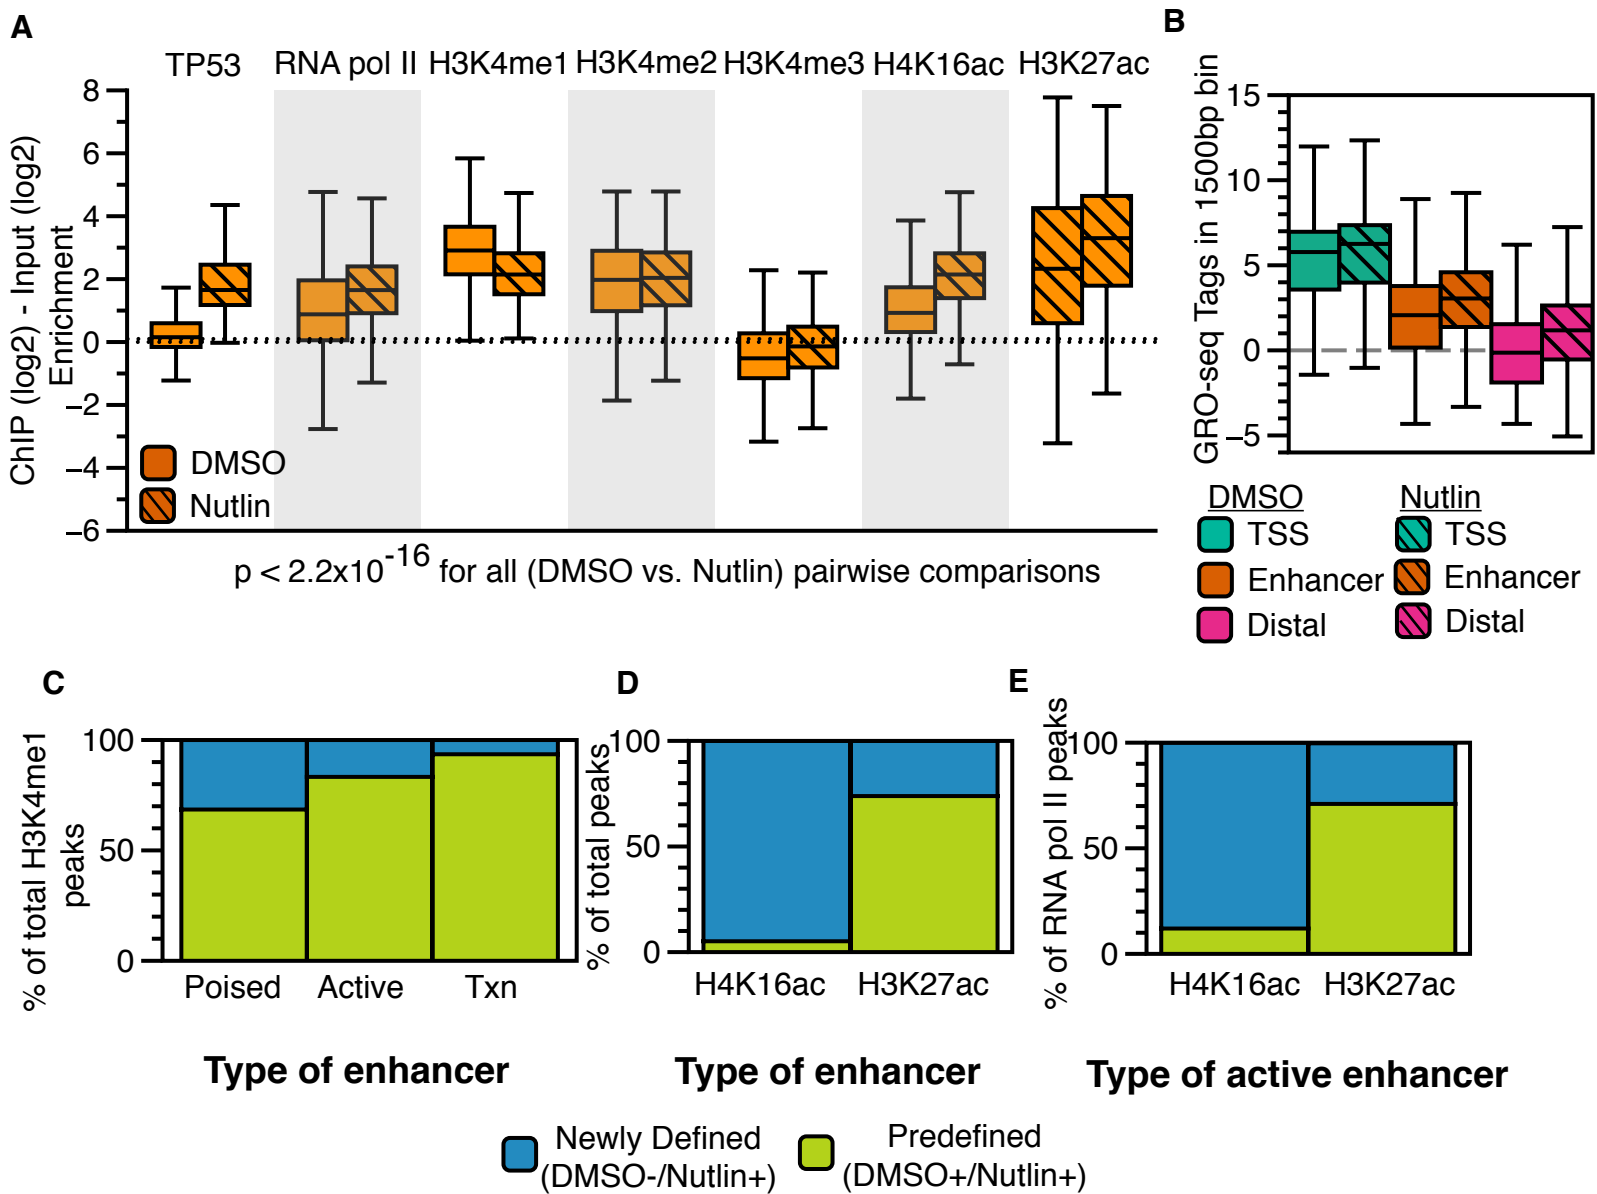

Supplement: supp_gr.181883.114_FigureS3.pdf [file supp_gr.181883.114_FigureS3.pdf]

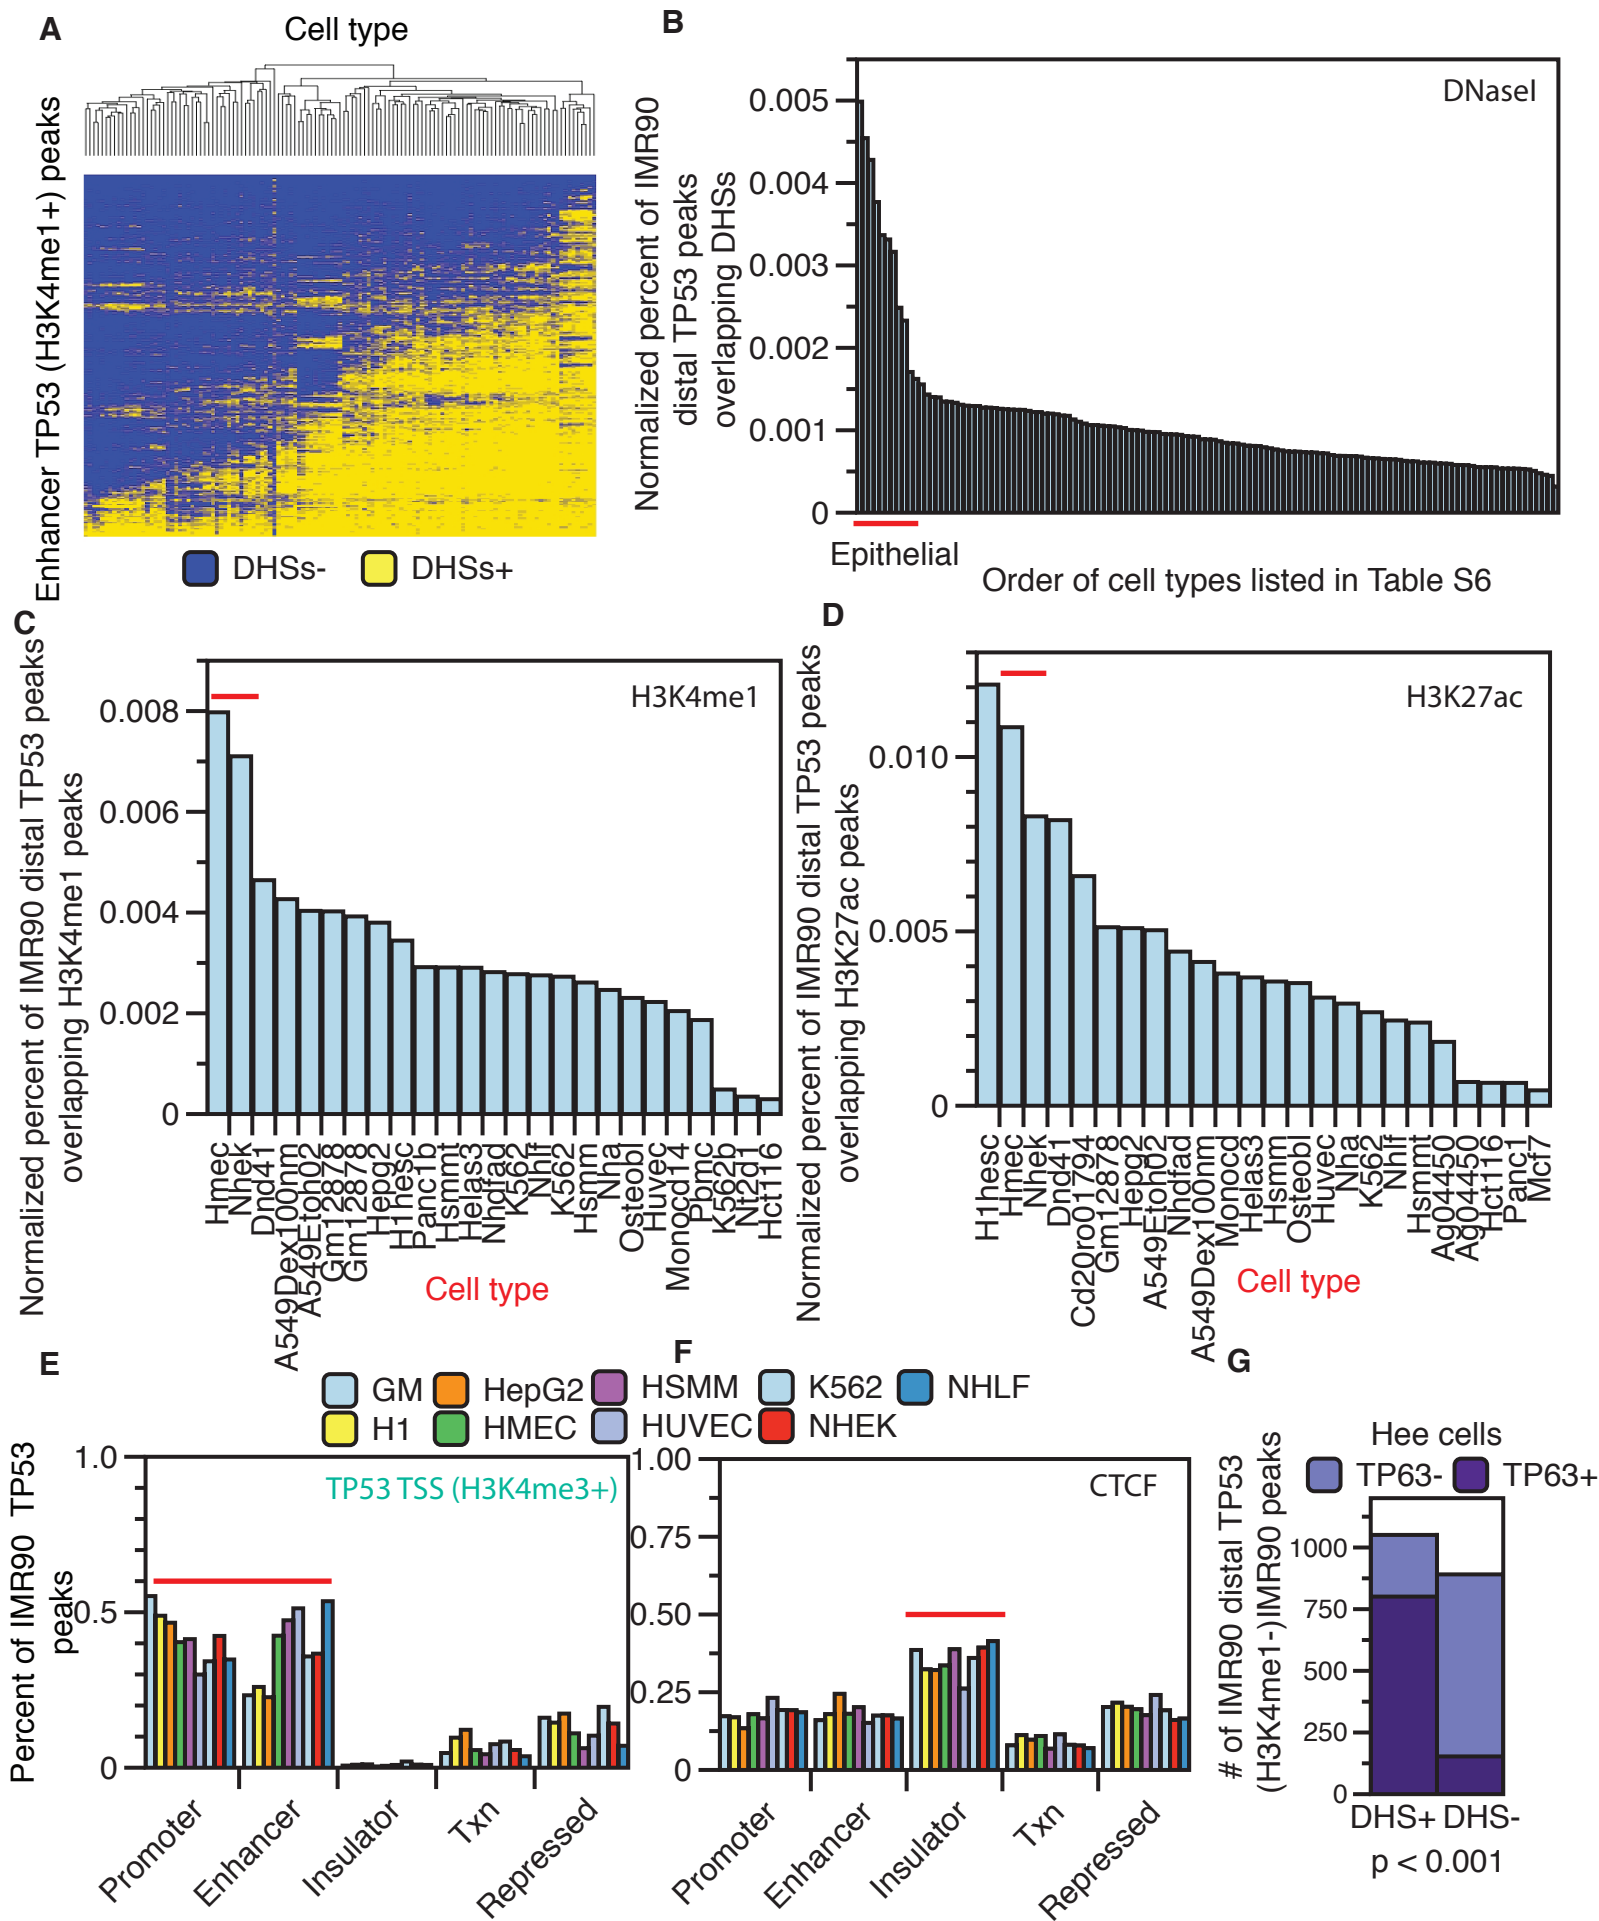

Supplement: supp_gr.181883.114_FigureS5.pdf [file supp_gr.181883.114_FigureS5.pdf]
